# Supplementary material for: Notifications on Pesticide Residues in the Rapid Alert System for Food and Feed (RASFF)
Source: MDPI journal article supplement (doi:10.3390/ijerph19148525), 2022-07-12
Supplement: s1 [file s1]

## Supplementary Material

### Notifications on Pesticide Residues in the Rapid Alert System for Food and Feed

**Table S1.** Number of notifications on particular pesticides in the RASFF in 1981–2020.

| Pesticide                            | Number of Notifications | Pesticide               | Number of Notifications |
|--------------------------------------|-------------------------|-------------------------|-------------------------|
| <b>pesticides analysed in detail</b> | <b>4061</b>             | buprofezin              | 57                      |
| acephate                             | 172                     | captan                  | 8                       |
| acetamiprid                          | 257                     | carbaryl                | 48                      |
| carbendazim                          | 333                     | carbosulfan             | 7                       |
| carbofuran                           | 184                     | chlorantraniliprole     | 4                       |
| chlorpyrifos                         | 460                     | chlorate                | 27                      |
| dichlorvos                           | 112                     | chlorbufam              | 2                       |
| dimethoate                           | 326                     | chlorfenapyr            | 44                      |
| ethylene oxide                       | 494                     | chlorfenvinphos         | 2                       |
| fipronil                             | 186                     | chlorfluazuron          | 22                      |
| formetanate                          | 203                     | chlormequat             | 99                      |
| methamidophos                        | 176                     | chlorothalonil          | 20                      |
| methomyl                             | 260                     | chlorpropham            | 7                       |
| monocrotophos                        | 159                     | chlorpyrifos-methyl     | 63                      |
| omethoate                            | 223                     | clofentezine            | 33                      |
| oxamyl                               | 160                     | clothianidin            | 15                      |
| profenofos                           | 143                     | copper                  | 10                      |
| triazophos                           | 213                     | cotinine                | 1                       |
| <b>all other pesticides</b>          | <b>3952</b>             | cyfluthrin              | 5                       |
| 1,4-dichlorobenzene                  | 8                       | cyhalothrin             | 12                      |
| 2,4-D                                | 1                       | cymoxanil               | 2                       |
| 2-chloroethanol                      | 7                       | cypermethrin            | 77                      |
| 3-hydroxycarbofuran                  | 2                       | cyproconazole           | 4                       |
| 4-CPA                                | 2                       | cyprodinil              | 10                      |
| abamectin                            | 9                       | cyromazine              | 4                       |
| acrinathrin                          | 4                       | DDT                     | 29                      |
| aldicarb                             | 5                       | deltamethrin            | 17                      |
| aldrin                               | 2                       | demeton-S-methyl        | 1                       |
| allethrin                            | 1                       | diafenthiuron           | 46                      |
| amitraz                              | 77                      | diazinon                | 37                      |
| anthraquinone                        | 77                      | dichlofluanide          | 1                       |
| azaconazole                          | 1                       | dicloran                | 3                       |
| azinphos-methyl                      | 19                      | dicofol                 | 33                      |
| azoxystrobin                         | 27                      | dicrotophos             | 19                      |
| bifenthrin                           | 38                      | didecyldimethylammonium | 22                      |
| biphenyl                             | 16                      | chloride (DDAC)         |                         |
| bitertanol                           | 2                       | dieldrin                | 7                       |
| boscalid                             | 19                      | diethion                | 21                      |
| bromide                              | 16                      | difenoconazole          | 16                      |
| bromopropylate                       | 10                      | diflubenzuron           | 2                       |
| bromuconazole                        | 1                       | dimefuron               | 1                       |
| bupirimate                           | 1                       | dimethomorph            | 18                      |

| <b>Pesticide</b>   | <b>Number of notifications</b> | <b>Pesticide</b>           | <b>Number of notifications</b> |
|--------------------|--------------------------------|----------------------------|--------------------------------|
| diniconazole       | 4                              | fonofos                    | 2                              |
| dinotefuran        | 47                             | formothion                 | 1                              |
| diphenylamine      | 7                              | fosthiazate                | 43                             |
| disulfoton         | 1                              | glyphosate                 | 30                             |
| dithiocarbamates   | 67                             | haloxyfop                  | 2                              |
| dodine             | 5                              | HCH                        | 29                             |
| E 324 - ethoxyquin | 3                              | heptachlor                 | 7                              |
| emamectin          | 5                              | heptenophos                | 1                              |
| endosulfan         | 79                             | hexachlorobenzene          | 12                             |
| endrin             | 1                              | hexachlorohexane           | 2                              |
| EPN                | 26                             | hexaconazole               | 55                             |
| esfenvalerate      | 20                             | hexaflumuron               | 9                              |
| ethephon           | 93                             | hydrogen phosphide         | 3                              |
| ethion             | 92                             | hymexazol                  | 1                              |
| ethofumesate       | 1                              | imazalil                   | 61                             |
| ethoprophos        | 3                              | imidacloprid               | 88                             |
| ethylene dibromide | 1                              | indoxacarb                 | 21                             |
| etofenprox         | 3                              | iprobenfos                 | 3                              |
| etoxazole          | 4                              | iprodione                  | 40                             |
| famoxadone         | 6                              | iprovalicarb               | 2                              |
| fenamidone         | 1                              | isocarbophos               | 13                             |
| fenamiphos         | 21                             | isofenphos-methyl          | 43                             |
| fenarimol          | 3                              | isoprocarb                 | 8                              |
| fenazaquin         | 2                              | isoprothiolane             | 9                              |
| fenbutatin oxide   | 7                              | kresoxim-methyl            | 6                              |
| fenhexamid         | 7                              | lambda-cyhalothrin         | 72                             |
| fenitrothion       | 29                             | linuron                    | 1                              |
| fenobucarb         | 4                              | lufenuron                  | 18                             |
| fenpropathrin      | 39                             | magnesium phosphide        | 1                              |
| fenpropidin        | 2                              | malathion                  | 75                             |
| fenpyroximate      | 1                              | mandipropamid              | 3                              |
| fenthion           | 16                             | matrine                    | 6                              |
| fenvalerate        | 53                             | mepiquat                   | 3                              |
| flzasulfuron       | 1                              | mepronil                   | 1                              |
| flonicamid         | 27                             | metalaxyl                  | 27                             |
| fluazifop-p        | 11                             | metaldehyde                | 1                              |
| fluazifop-P-butyl  | 6                              | metamitron                 | 2                              |
| fluazinam          | 1                              | methidathion               | 30                             |
| flubendiamide      | 11                             | methiocarb                 | 23                             |
| fludioxonil        | 6                              | methoxychlor               | 3                              |
| flufenoxuron       | 3                              | methoxyfenozone            | 9                              |
| fluopicolide       | 2                              | methyl bromide             | 5                              |
| fluopyram          | 4                              | metrafenone                | 4                              |
| fluoxastrobin      | 1                              | mirex                      | 1                              |
| flupyradifuron     | 1                              | myclobutanil               | 12                             |
| flusilazole        | 22                             | N,N-diethyl-meta-toluamide | 5                              |
| flutriafol         | 4                              | (DEET)                     |                                |
| folpet             | 10                             | naphthalene                | 2                              |

| Pesticide                          | Number of notifications | Pesticide          | Number of notifications |
|------------------------------------|-------------------------|--------------------|-------------------------|
| nicotine                           | 23                      | pyrazophos         | 1                       |
| nitrofen                           | 17                      | pyridaben          | 69                      |
| novaluron                          | 1                       | pyridalyl          | 4                       |
| nuarimol                           | 4                       | pyrimethanil       | 11                      |
| organophosphate pesticides         | 3                       | quinalphos         | 10                      |
| orthophenylphenol                  | 3                       | quinoxifen         | 1                       |
| oxadixyl                           | 1                       | quintozene         | 2                       |
| oxydemeton-methyl                  | 9                       | raticide           | 5                       |
| paclobutrazol                      | 1                       | roxymidone         | 1                       |
| paraoxon-methyl                    | 1                       | slug pellets       | 2                       |
| parathion                          | 4                       | spinosad           | 3                       |
| parathion-methyl                   | 22                      | spiromesifen       | 7                       |
| penconazole                        | 8                       | spirotetramat      | 2                       |
| pencycuron                         | 3                       | sulfotep           | 3                       |
| pentachlorophenol                  | 12                      | sulphur            | 3                       |
| permethrin                         | 43                      | syprodiinil        | 1                       |
| pesticide residues (not specified) | 34                      | tau-fluvalinate    | 10                      |
| phenmedipham                       | 1                       | tebuconazole       | 47                      |
| phentachloroaniline                | 1                       | tebufenozide       | 1                       |
| phenthoate                         | 17                      | tebufenpyrad       | 7                       |
| phorate                            | 5                       | tecnazene          | 1                       |
| phosalone                          | 13                      | teflubenzuron      | 4                       |
| phosmet                            | 7                       | terbucarb          | 1                       |
| phosphamidone                      | 1                       | tetraconazole      | 7                       |
| phoxim                             | 1                       | tetradifon         | 44                      |
| picoxystrobin                      | 1                       | tetramethrin       | 9                       |
| piperonylbutoxide                  | 4                       | thiabendazole      | 21                      |
| pirimicarb                         | 6                       | thiacloprid        | 8                       |
| pirimiphos-methyl                  | 38                      | thiamethoxam       | 35                      |
| prochloraz                         | 76                      | thiodicarb         | 10                      |
| procymidone                        | 96                      | thiophanate-methyl | 41                      |
| promecarb                          | 3                       | tolfenpyrad        | 63                      |
| prometryn                          | 5                       | triadimefon        | 8                       |
| propamocarb                        | 9                       | triadimenol        | 13                      |
| propargite                         | 94                      | trichlorfon        | 10                      |
| propiconazole                      | 31                      | tricyclazole       | 61                      |
| propoxur                           | 4                       | trifloxystrobin    | 11                      |
| proquinazid                        | 1                       | trifluralin        | 17                      |
| prothiofos                         | 15                      | triforine          | 1                       |
| pymetrozine                        | 2                       | vinclozolin        | 1                       |
| pyraclostrobin                     | 17                      | <b>Total</b>       | <b>8013</b>             |

**Table S2.** Short names of some values of the variables: product category, notification basis, distribution status and action taken.

| <b>Short Name</b>               | <b>Original Name</b>                              |
|---------------------------------|---------------------------------------------------|
| <b>Product Category</b>         |                                                   |
| cereals                         | cereals and bakery products                       |
| cocoa, coffee, tea              | cocoa and cocoa preparations, coffee and tea      |
| crustaceans                     | crustaceans and products thereof                  |
| dietetic foods...               | dietetic foods, food supplements, fortified foods |
| eggs                            | eggs and egg products                             |
| fats, oils                      | fats and oils                                     |
| feed for food                   | feed for food-producing animals                   |
| fish                            | fish and fish products                            |
| food additives                  | food additives and flavourings                    |
| food materials                  | food contact materials                            |
| fruits, vegetables              | fruits and vegetables                             |
| herbs, spices                   | herbs and spices                                  |
| honey                           | honey and royal jelly                             |
| meat                            | meat and meat products (other than poultry)       |
| milk                            | milk and milk products                            |
| beverages                       | non-alcoholic beverages                           |
| nuts                            | nuts, nut products and seeds                      |
| other food product              | other food product / mixed                        |
| poultry meat                    | poultry meat and poultry meat products            |
| prepared dishes                 | prepared dishes and snacks                        |
| soups, broths...                | soups, broths, sauces and condiments              |
| <b>notification basis</b>       |                                                   |
| border control – detained       | border control - consignment detained             |
| border control – released       | border control - consignment released             |
| border control – customs        | border control - consignment under customs        |
| official control / RASFF        | official control following RASFF notification     |
| official control                | official control on the market                    |
| <b>distribution status</b>      |                                                   |
| distribution (possible)         | distribution on the market (possible)             |
| distribution restricted         | distribution restricted to notifying country      |
| distr. to non-member countries  | distribution to non-member countries only         |
| distribution to other countries | distribution to other member countries            |
| information not available       | information on distribution not (yet) available   |
| no distr. from notif. country   | no distribution from notifying country            |
| no distr. to other countries    | no distribution to other member countries         |
| product no longer on market     | product (presumably) no longer on the market      |
| product consumed                | product already consumed                          |
| product forw. to destination    | product forwarded to destination                  |
| product not placed on market    | product not (yet) placed on the market            |
| <b>action taken</b>             |                                                   |
| destination identified          | destination of the product identified             |
| import not authorised           | import not authorised                             |
| phys./chem. treatment           | physical/chemical treatment                       |
| placed under customs            | placed under customs seals                        |
| product consumed                | product already consumed                          |
| product recall/withdrawal       | product recall or withdrawal                      |
| sales ban                       | prohibition to trade - sales ban                  |
| public warning – press          | public warning - press release                    |
| product passed the MDD          | product passed the Minimal Durability Date        |
| use for other purpose           | use for other purpose than food/feed              |
| withdrawal from recipient       | withdrawal from recipient(s)                      |
| withdrawal from market          | withdrawal from the market                        |

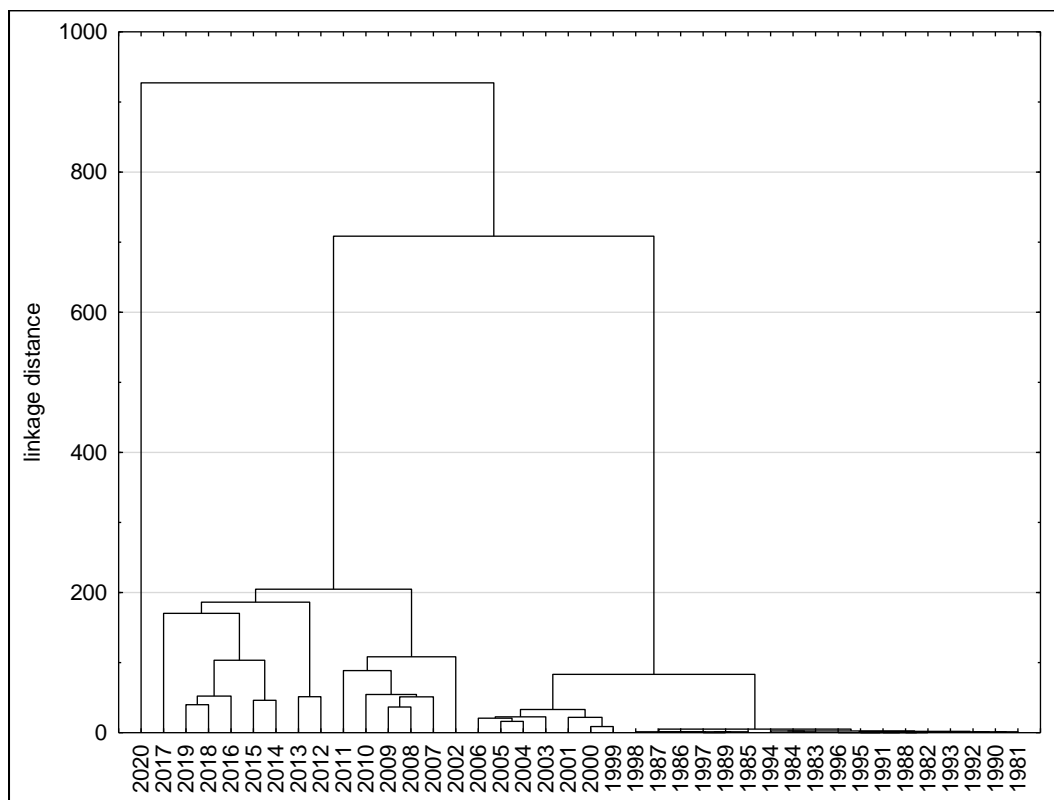

**Figure S1a.** Results of joining cluster analysis for years

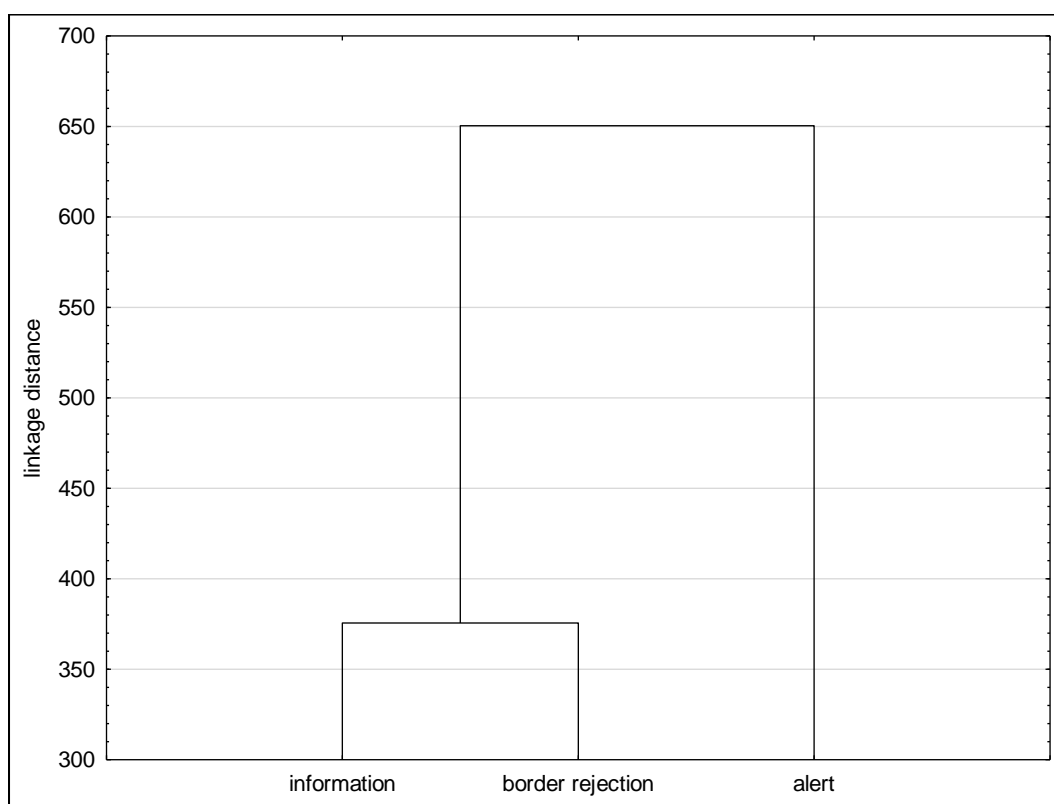

**Figure S1b.** Results of joining cluster analysis for notification type

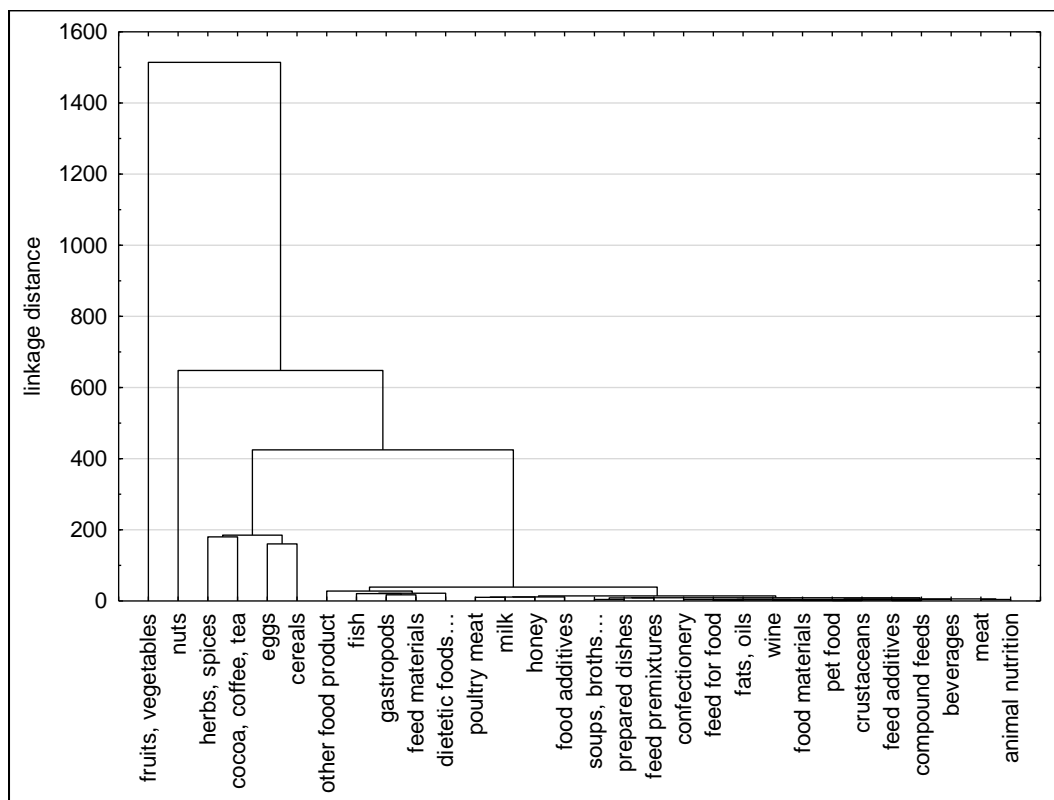

**Figure S1c.** Results of joining cluster analysis for product categories

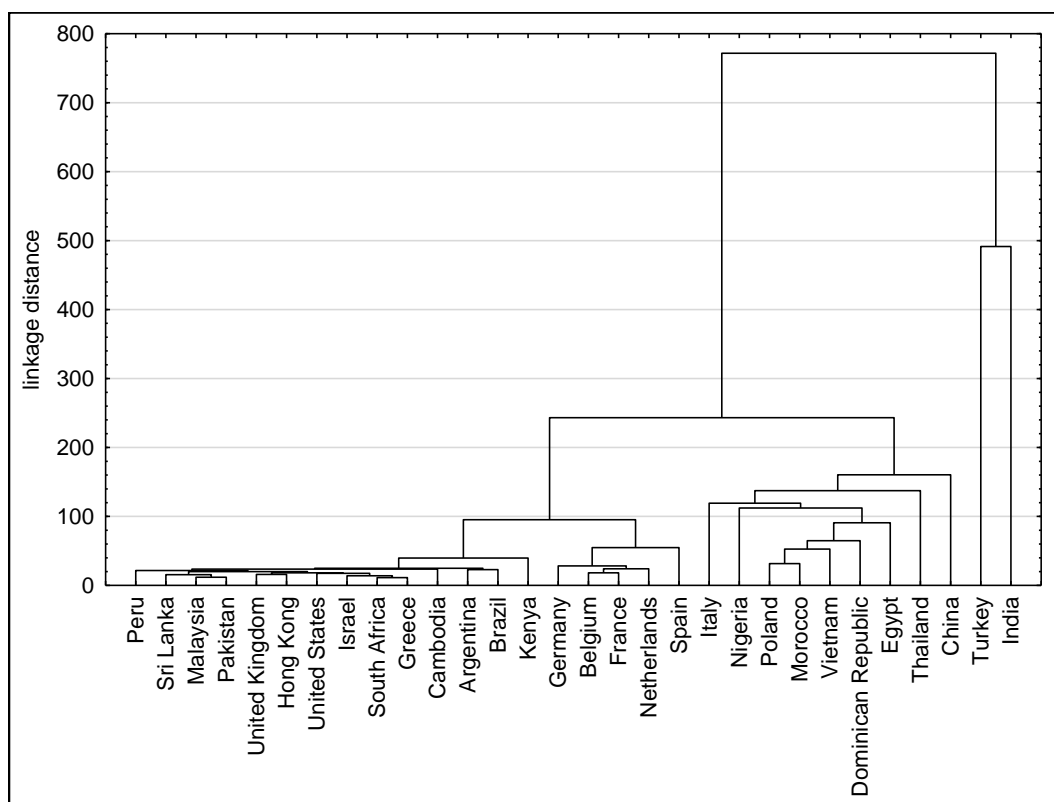

**Figure S1d.** Results of joining cluster analysis for origin countries

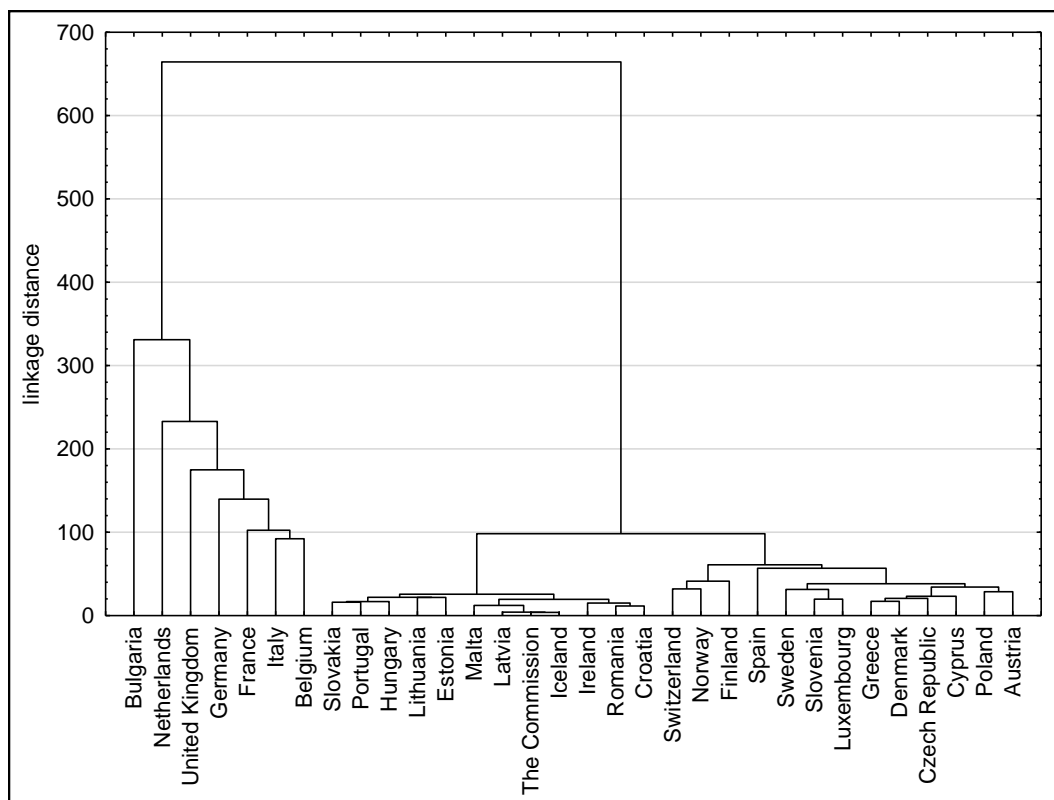

**Figure S1e.** Results of joining cluster analysis for notifying countries

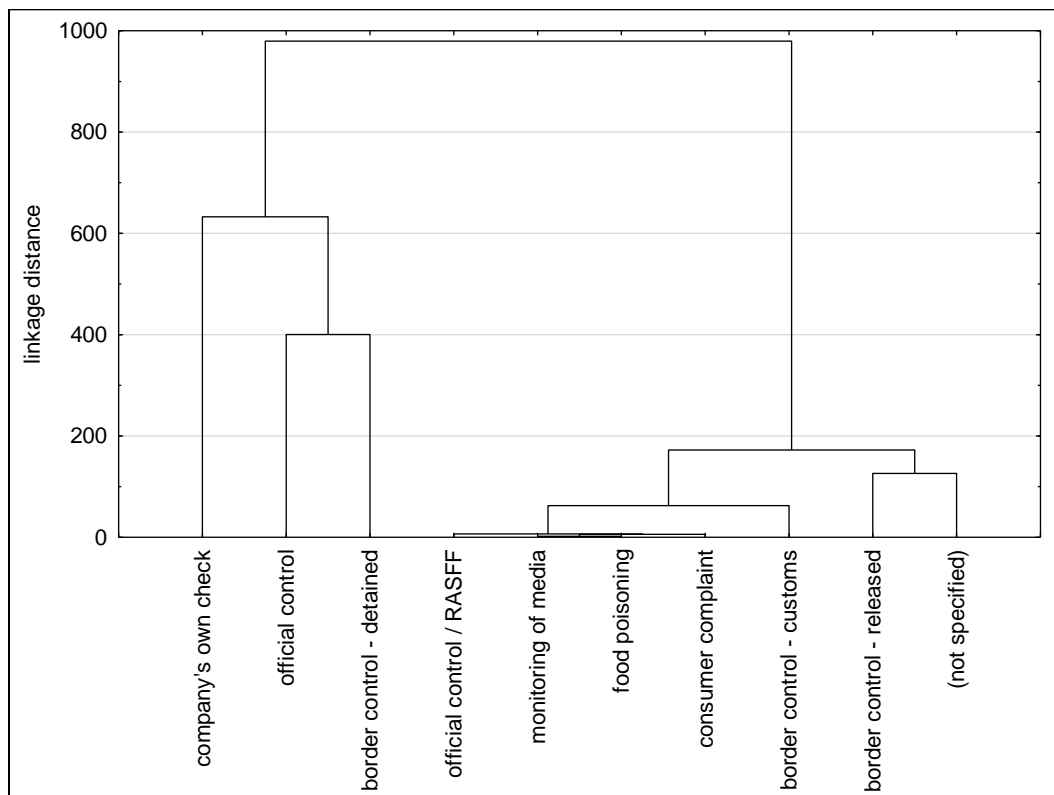

**Figure S1f.** Results of joining cluster analysis for notification basis

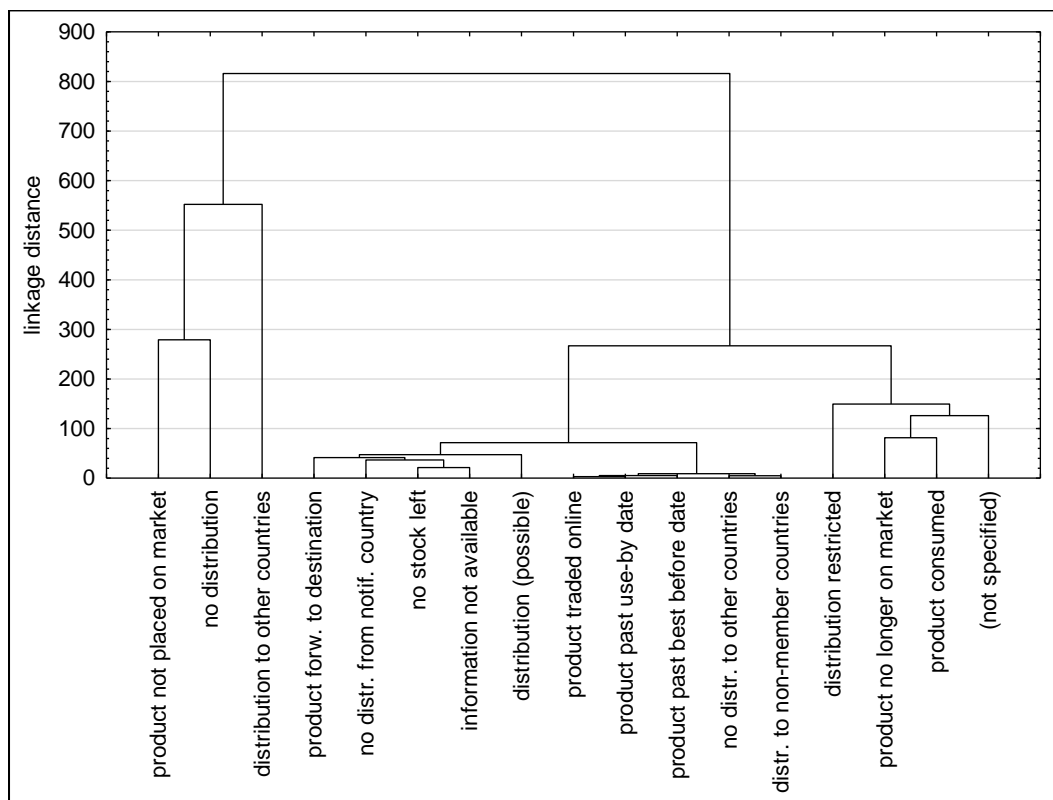

**Figure S1g.** Results of joining cluster analysis for distribution status

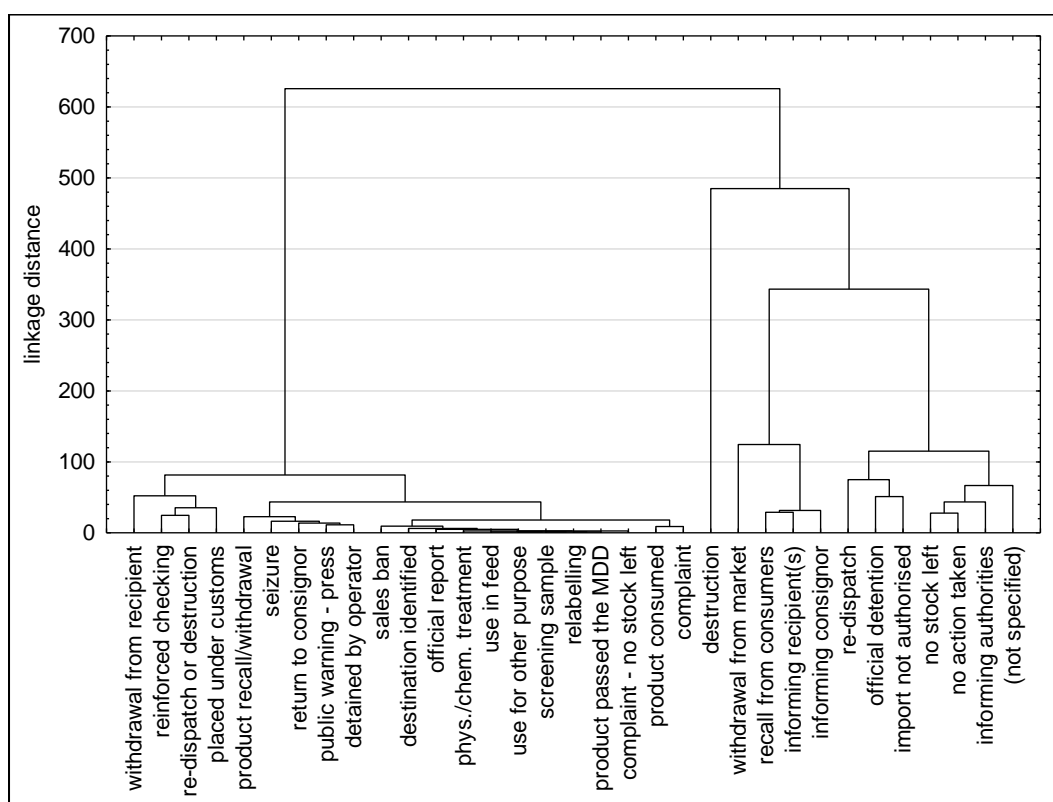

**Figure S1h.** Results of joining cluster analysis for action taken



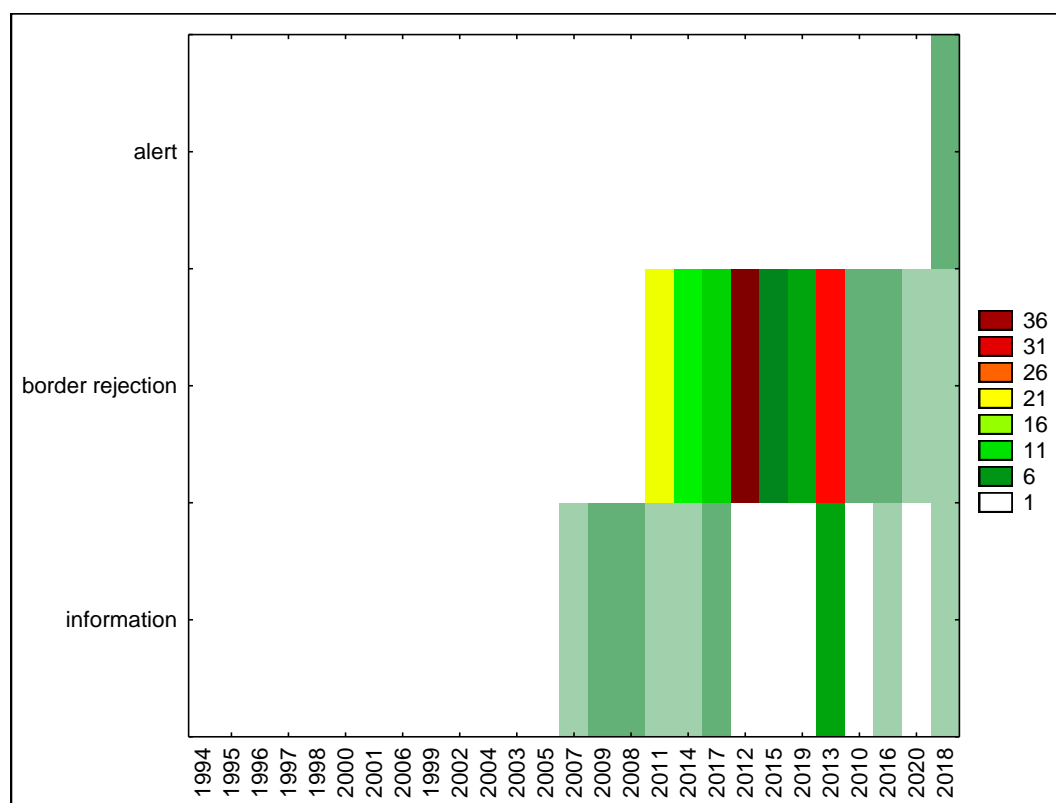

**Figure S2a.** Results of two-way joining cluster analysis for acephate (notification type)

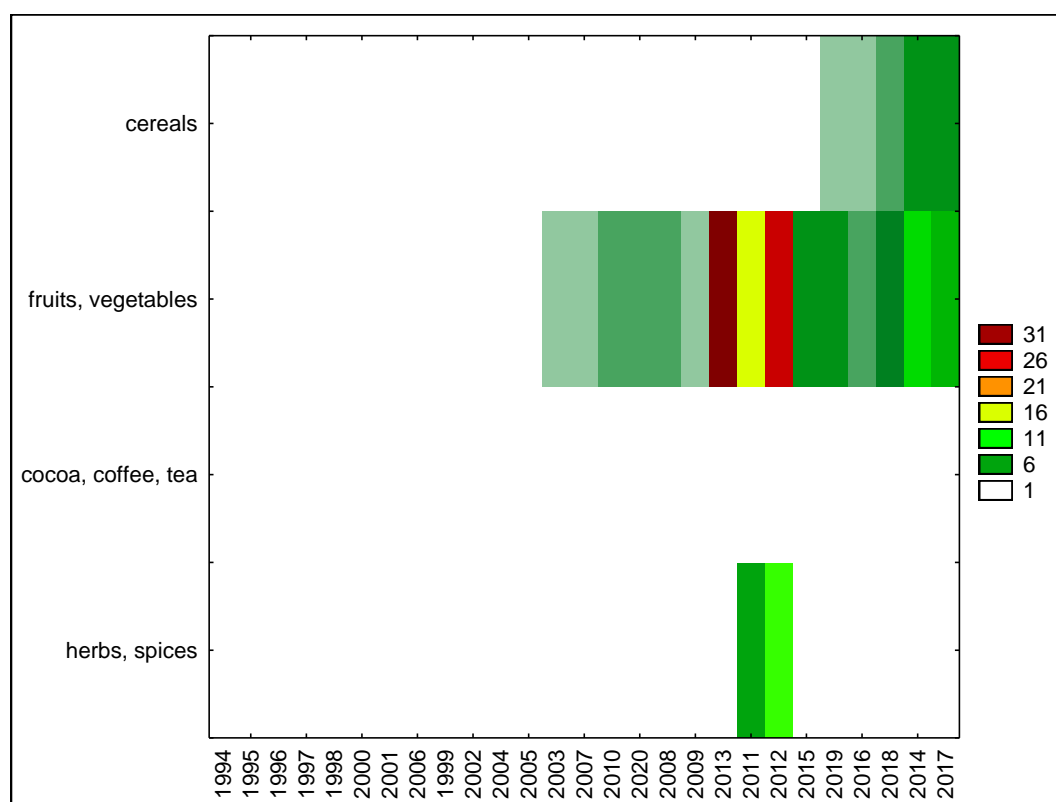

**Figure S2b.** Results of two-way joining cluster analysis for acephate (product category)

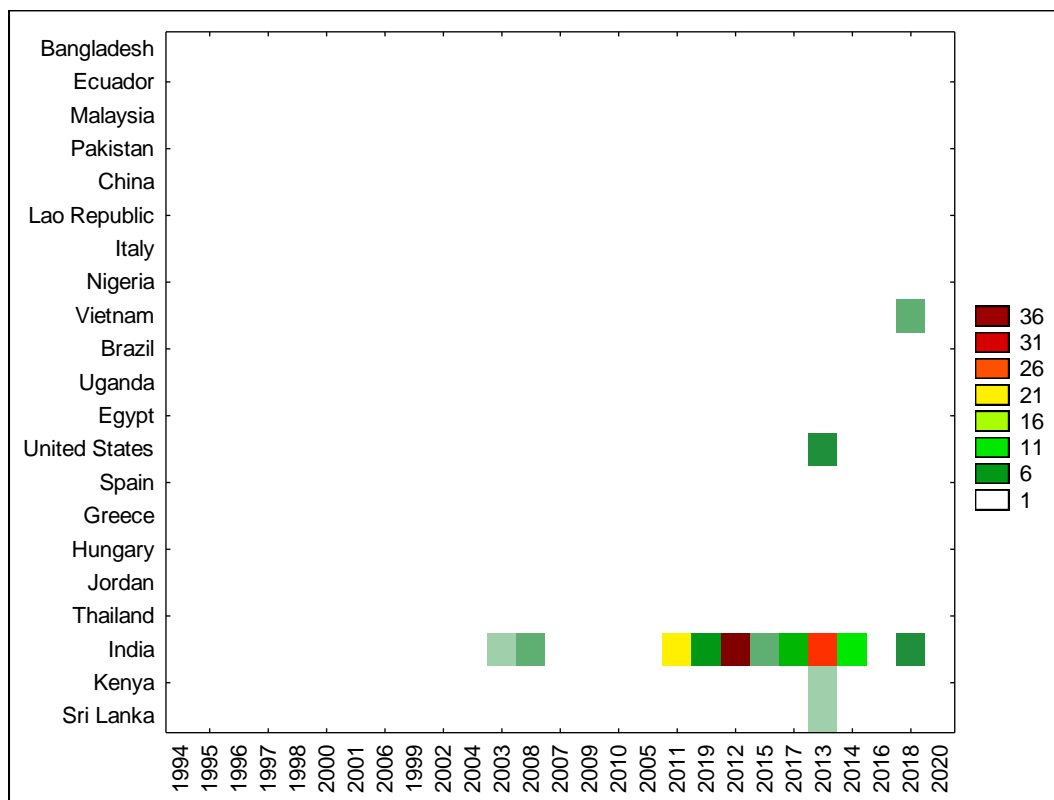

**Figure S2c.** Results of two-way joining cluster analysis for acephate (origin country)

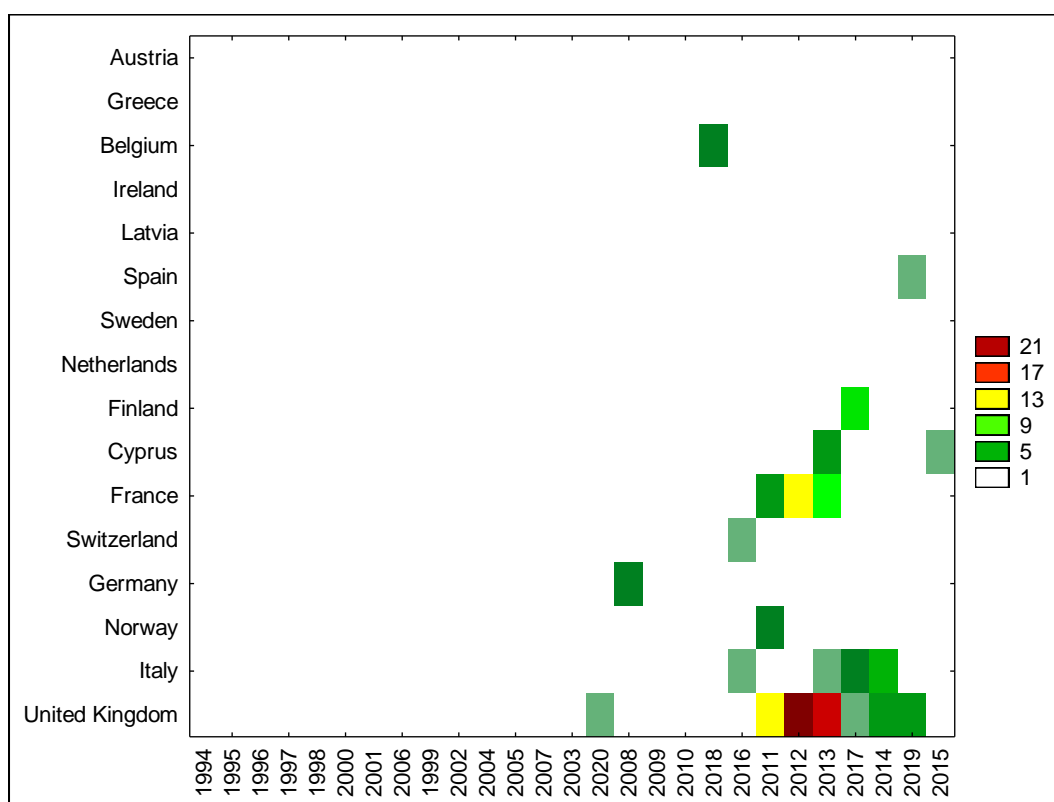

**Figure S2d.** Results of two-way joining cluster analysis for acephate (notifying country)

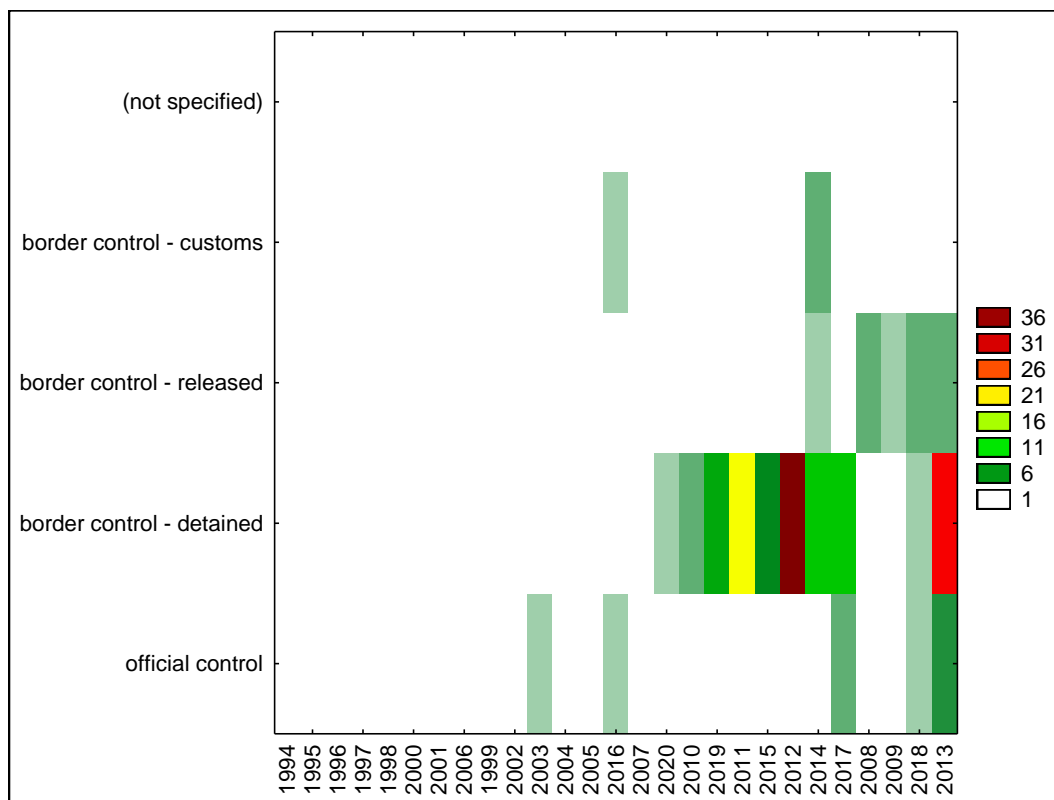

**Figure S2e.** Results of two-way joining cluster analysis for acephate (notification basis)

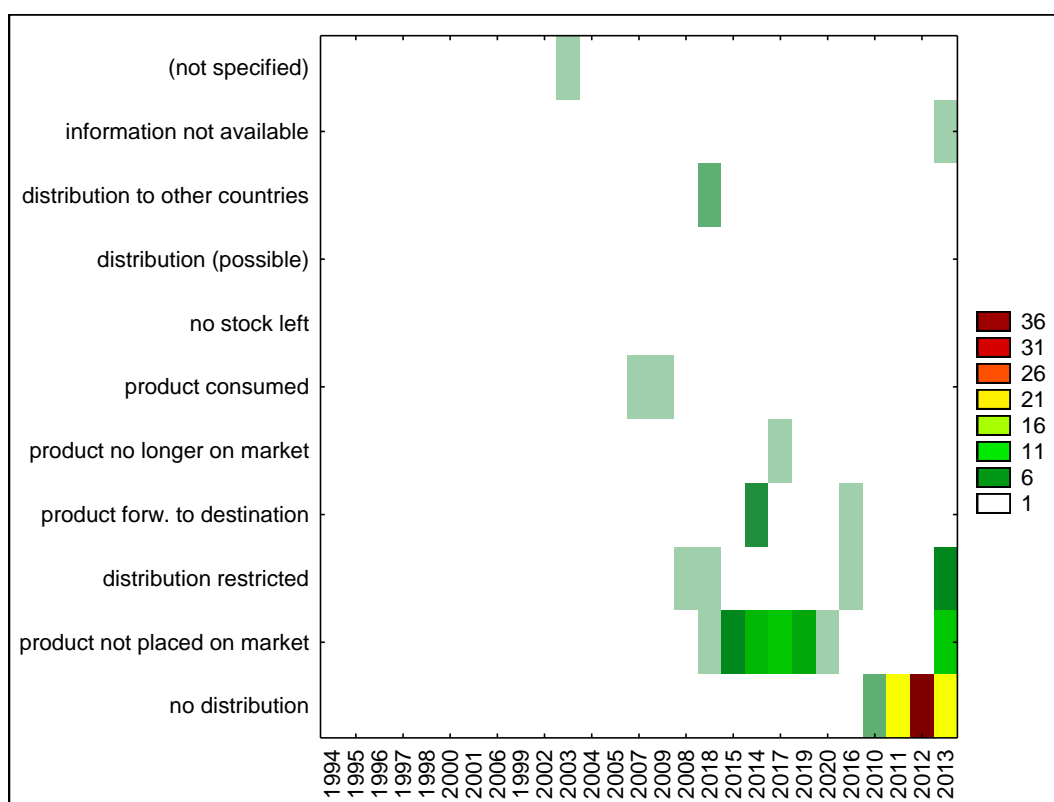

**Figure S2f.** Results of two-way joining cluster analysis for acephate (distribution status)

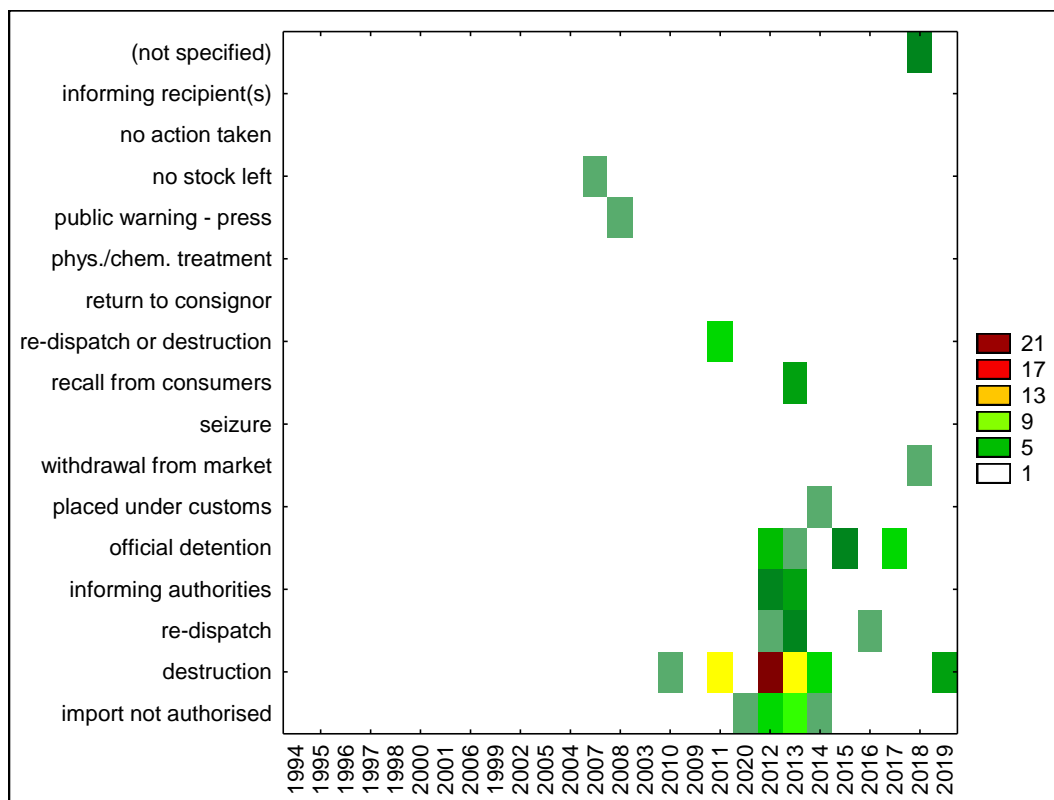

**Figure S2g.** Results of two-way joining cluster analysis for acephate (action taken)

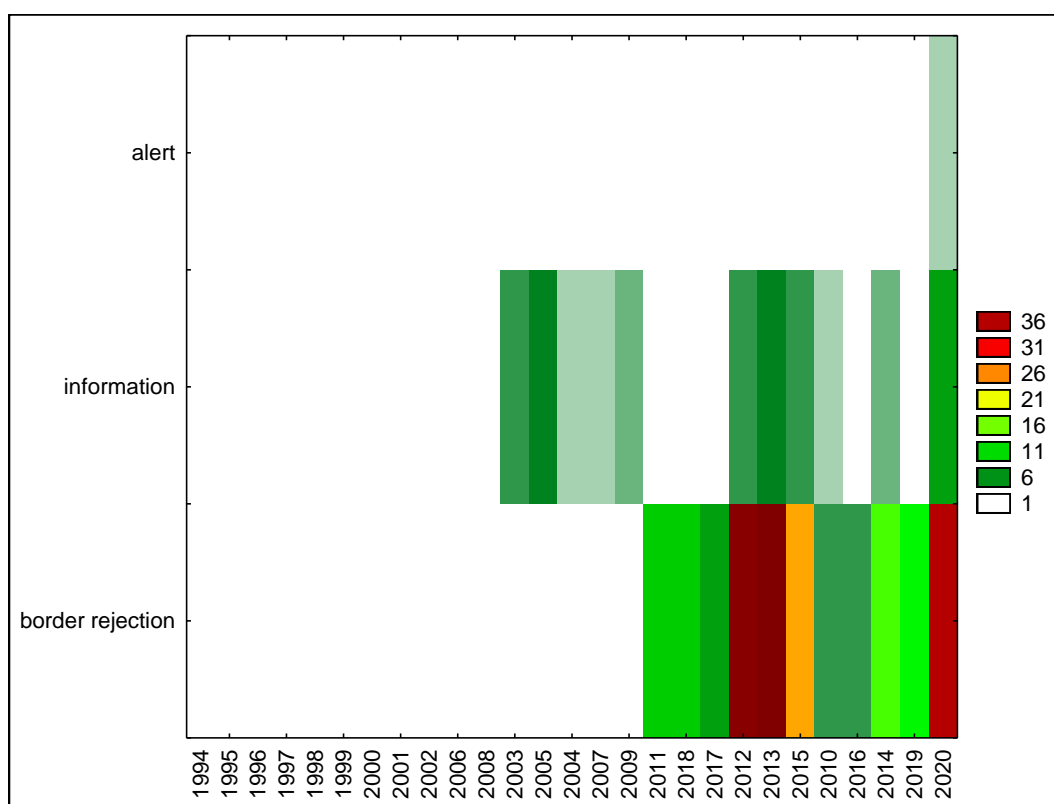

**Figure S3a.** Results of two-way joining cluster analysis for acetamiprid (notification type)

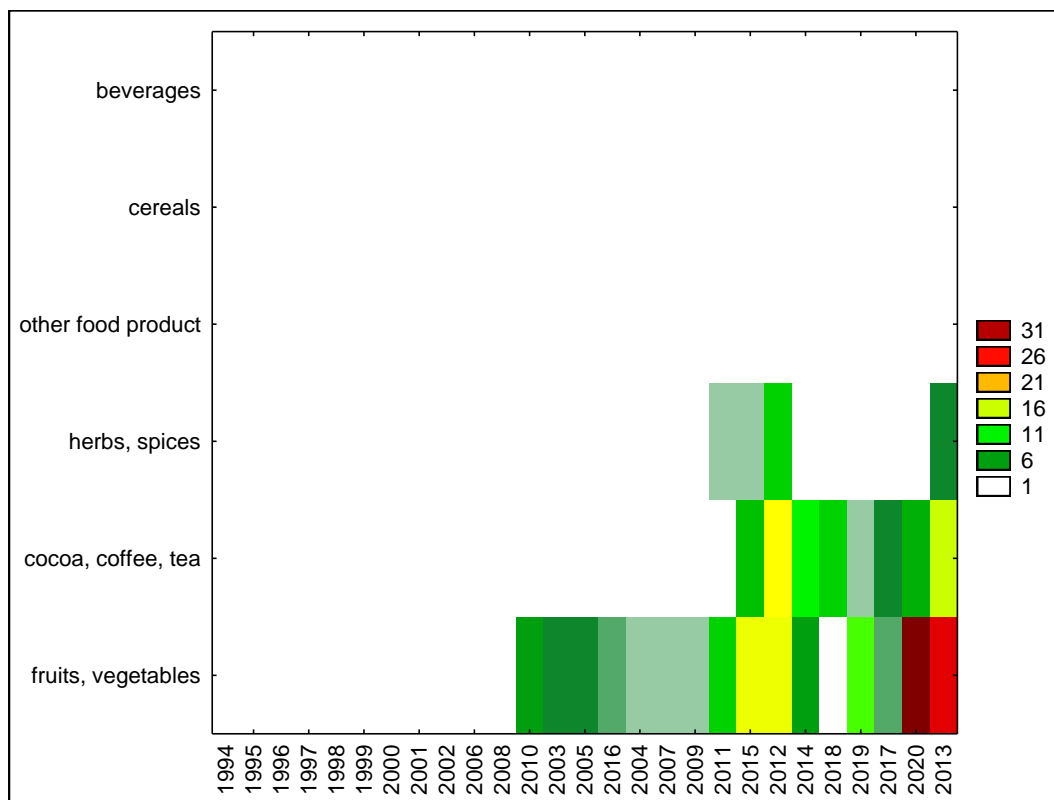

**Figure S3b.** Results of two-way joining cluster analysis for acetamiprid (product category)

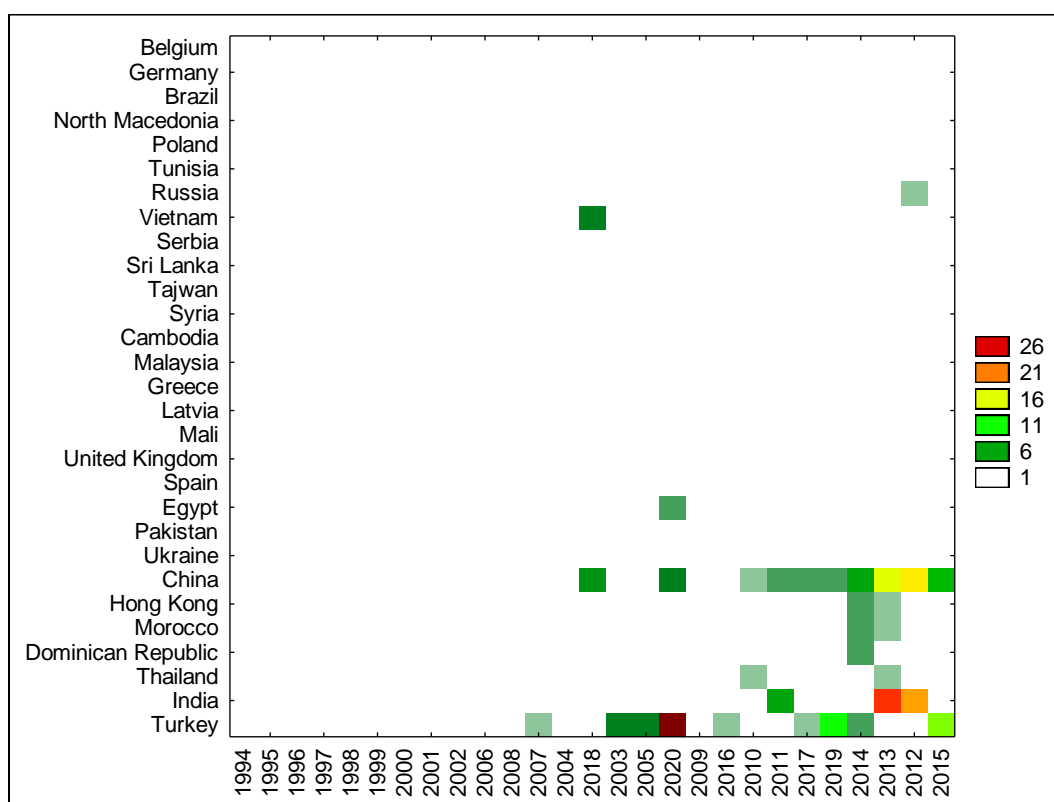

**Figure S3c.** Results of two-way joining cluster analysis for acetamiprid (origin country)

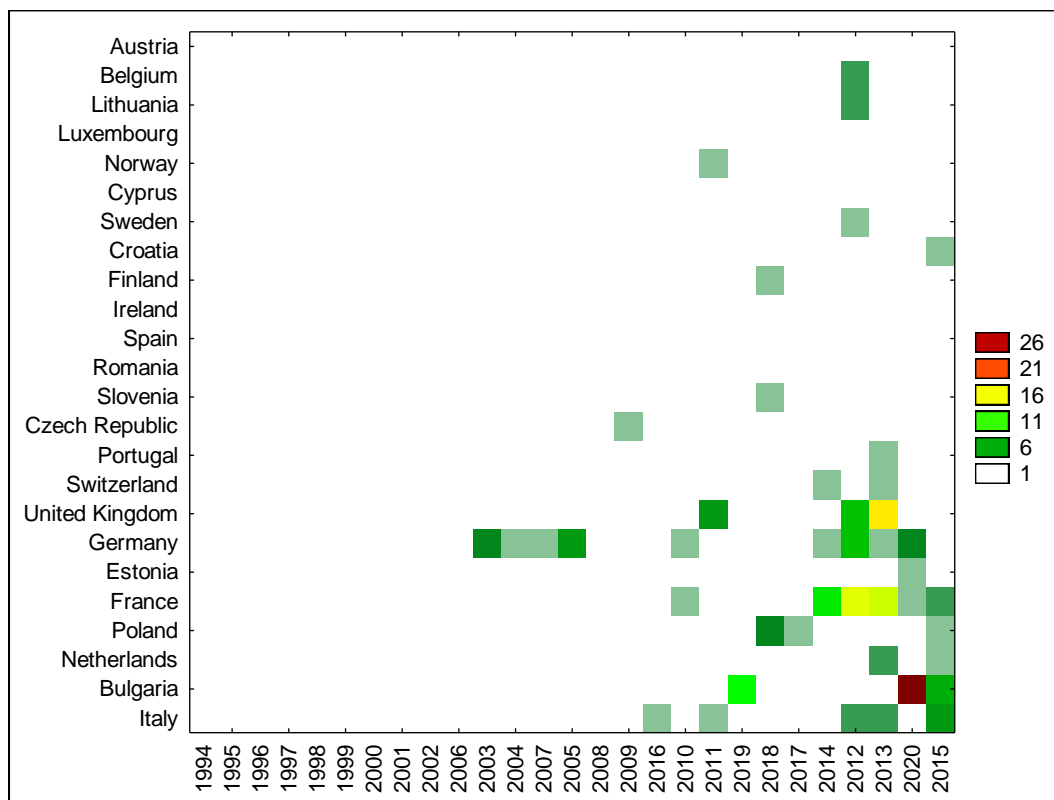

**Figure S3d.** Results of two-way joining cluster analysis for acetamiprid (notifying country)

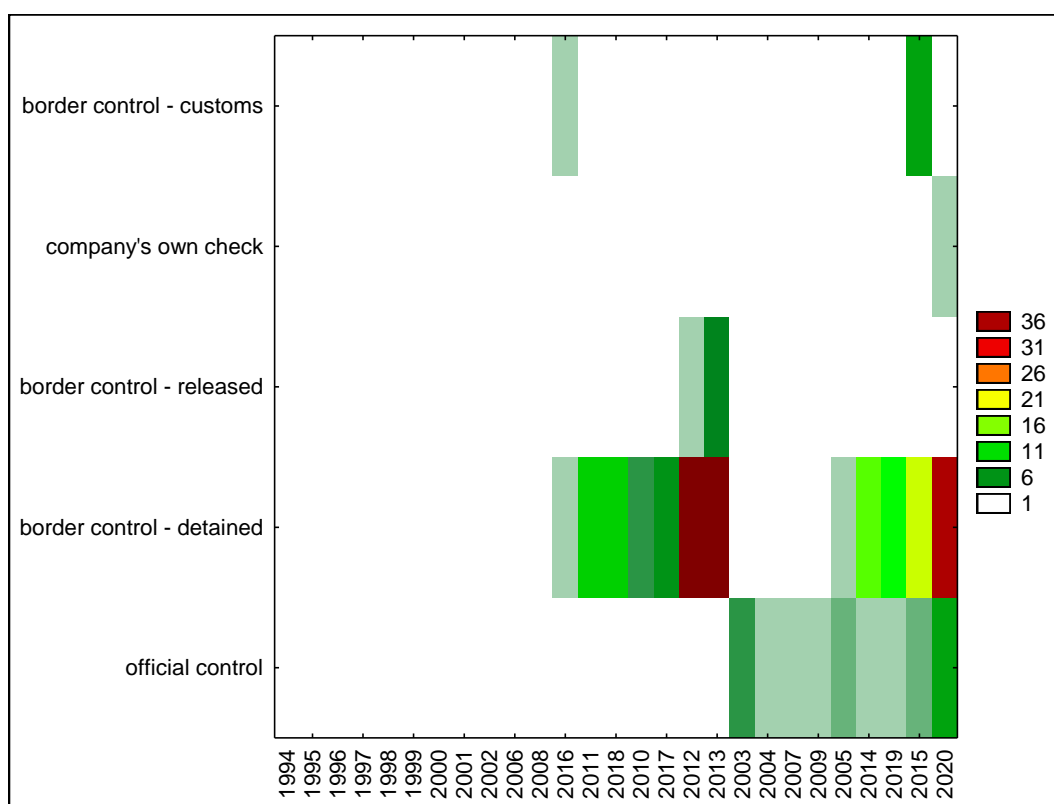

**Figure S3e.** Results of two-way joining cluster analysis for acetamiprid (notification basis)

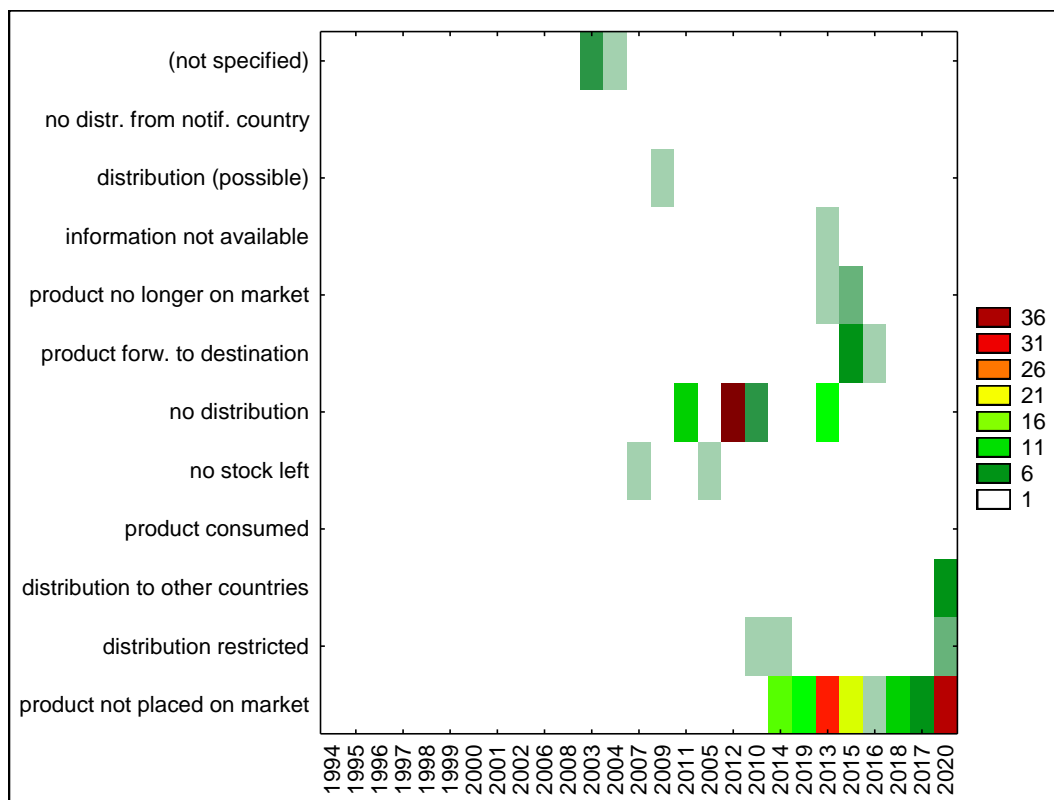

**Figure S3f.** Results of two-way joining cluster analysis for acetamiprid (distribution status)

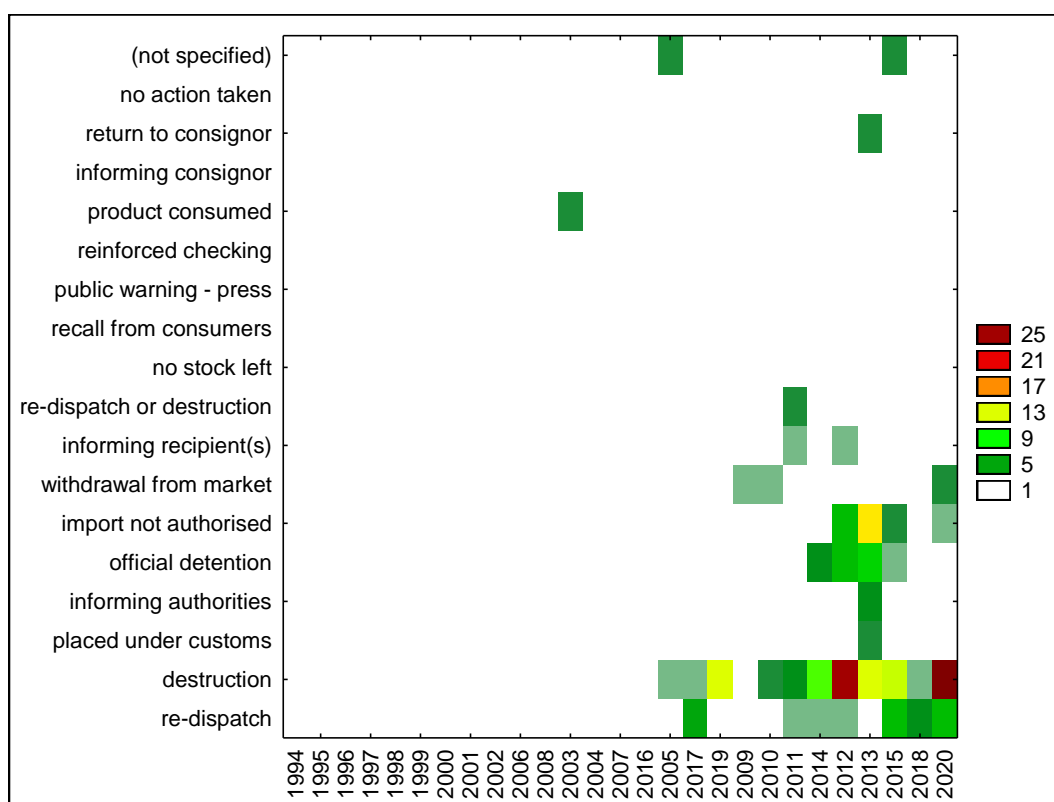

**Figure S3g.** Results of two-way joining cluster analysis for acetamiprid (action taken)

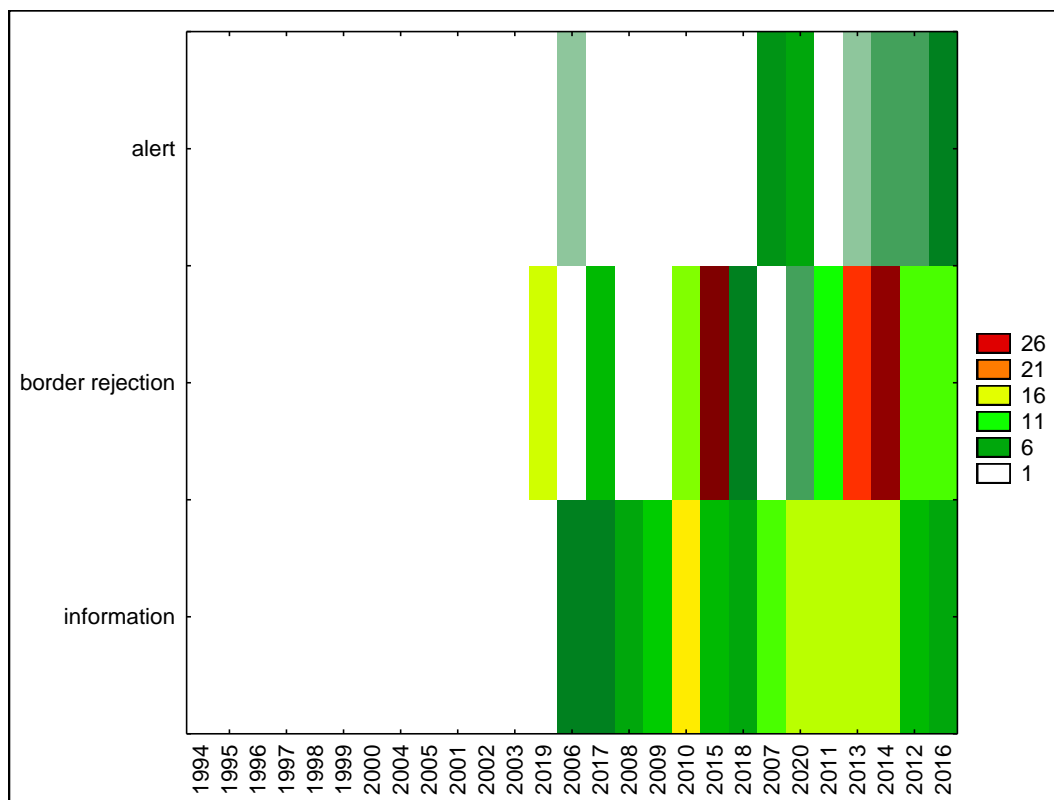

**Figure S4a.** Results of two-way joining cluster analysis for carbendazim (notification type)

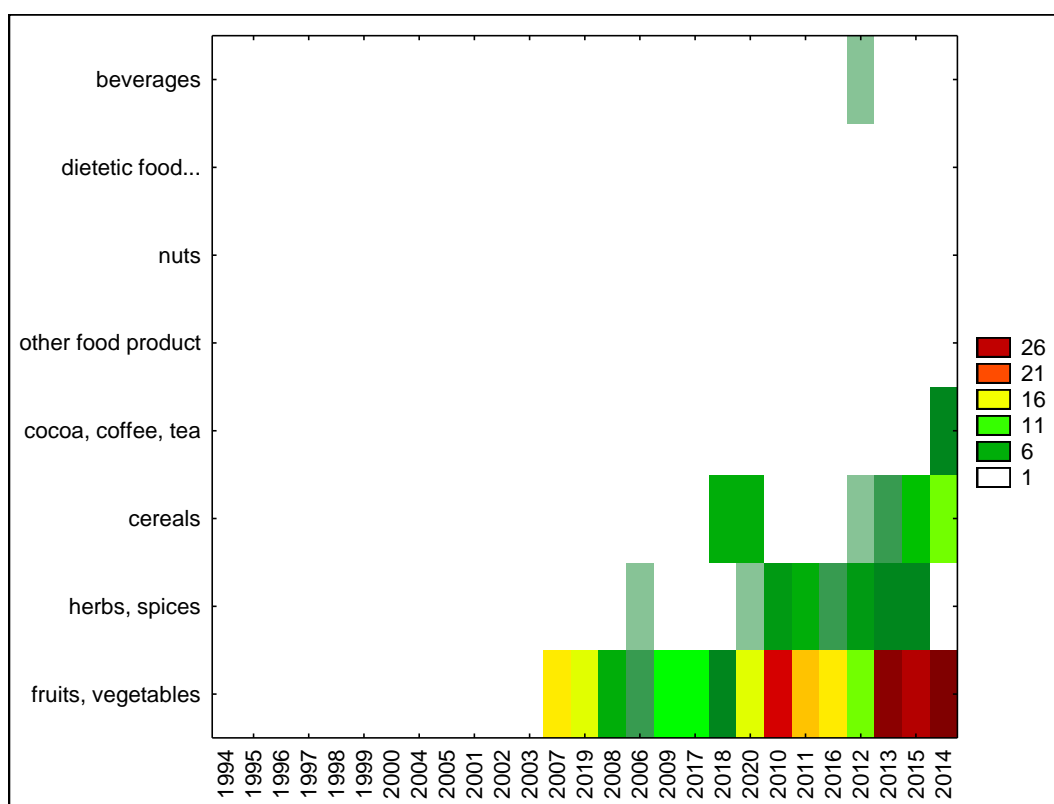

**Figure S4b.** Results of two-way joining cluster analysis for carbendazim (product category)



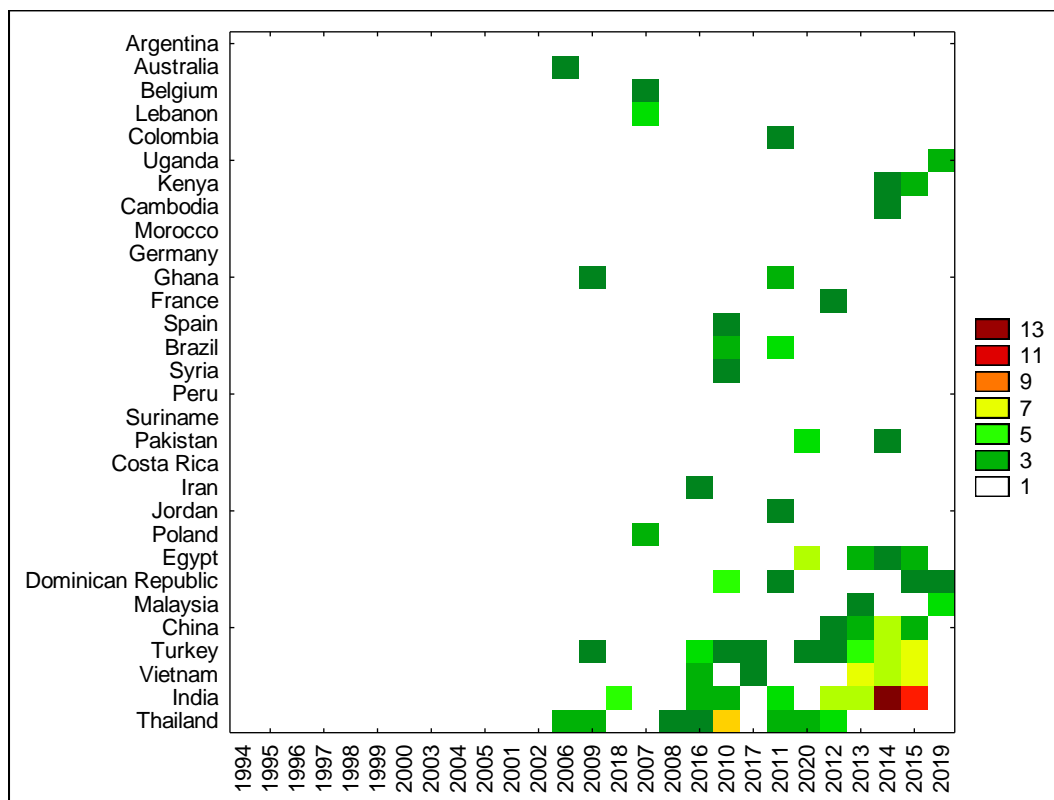

**Figure S4c.** Results of two-way joining cluster analysis for carbendazim (origin country)

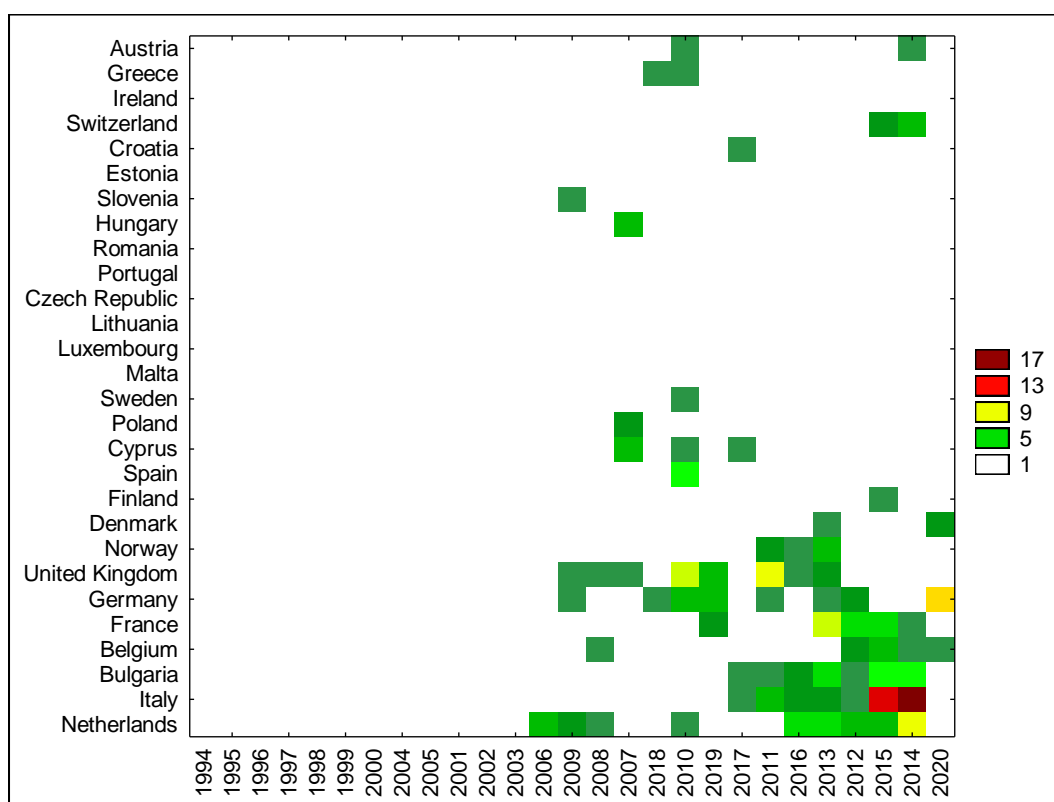

**Figure S4d.** Results of two-way joining cluster analysis for carbendazim (notifying country)

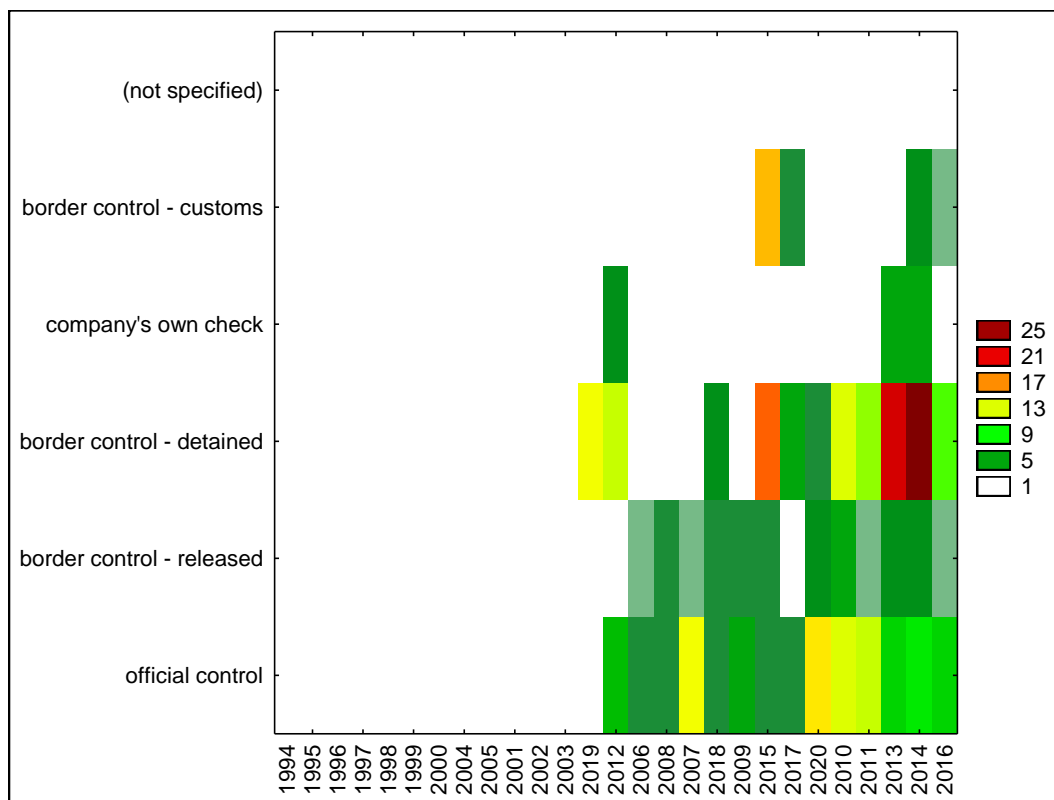

**Figure S4e.** Results of two-way joining cluster analysis for carbendazim (notification basis)

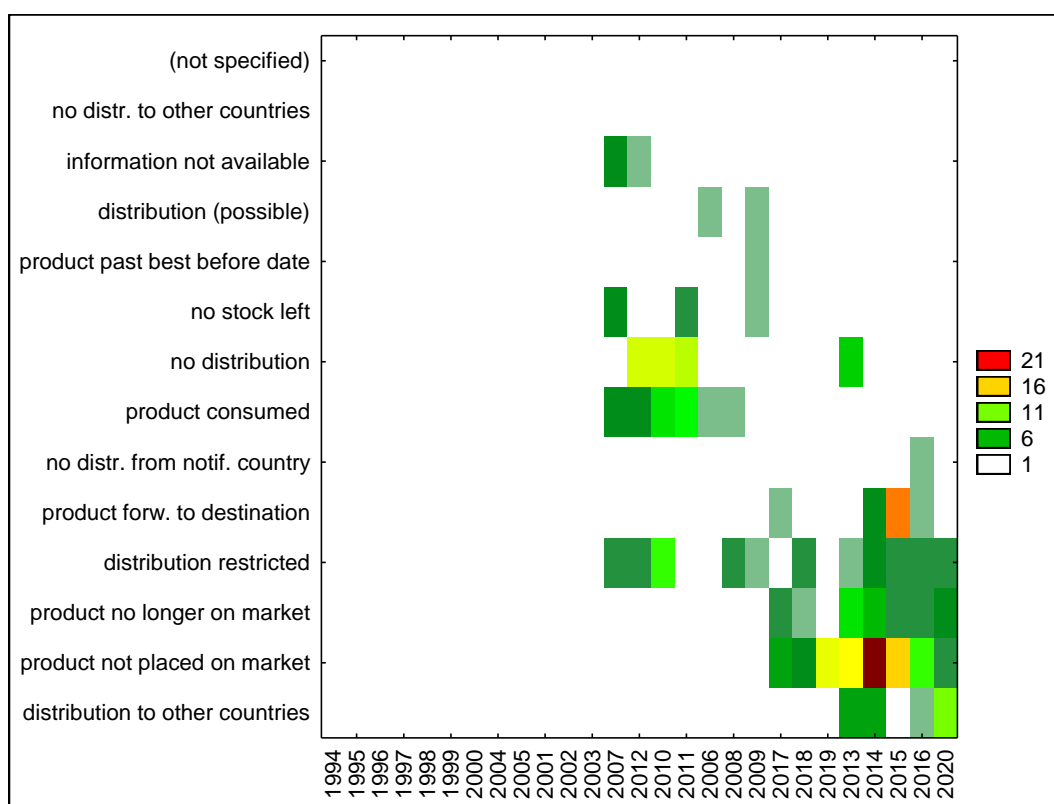

**Figure S4f.** Results of two-way joining cluster analysis for carbendazim (distribution status)

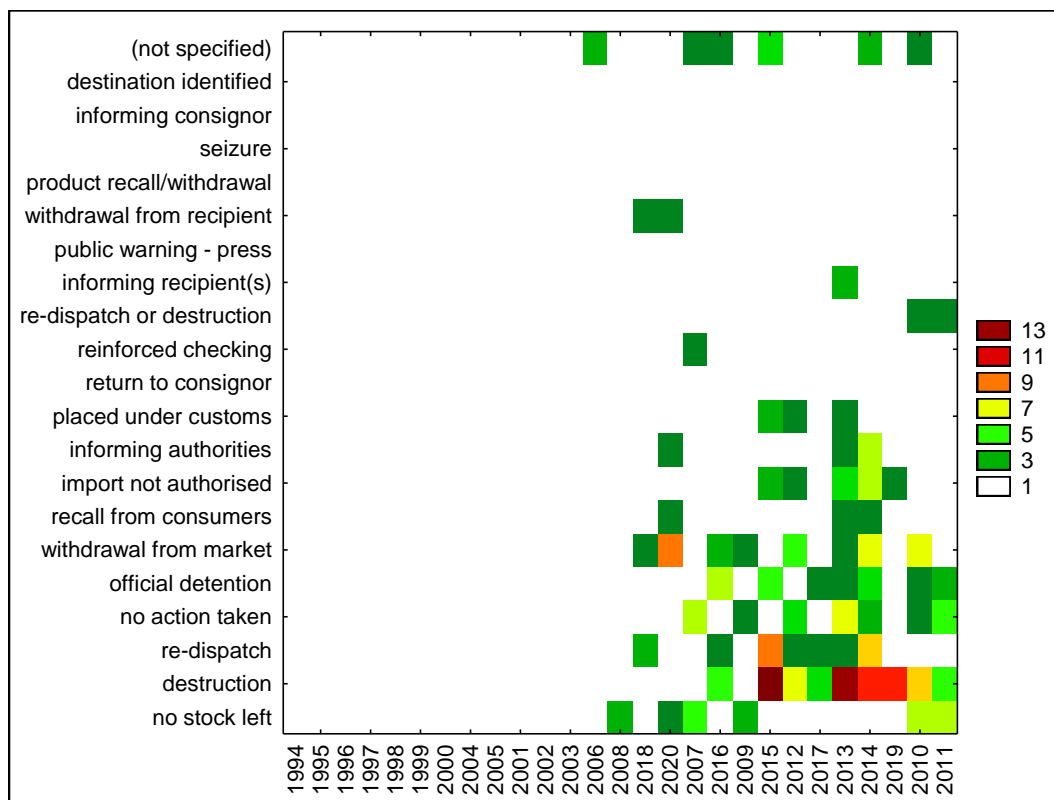

**Figure S4g.** Results of two-way joining cluster analysis for carbendazim (action taken)

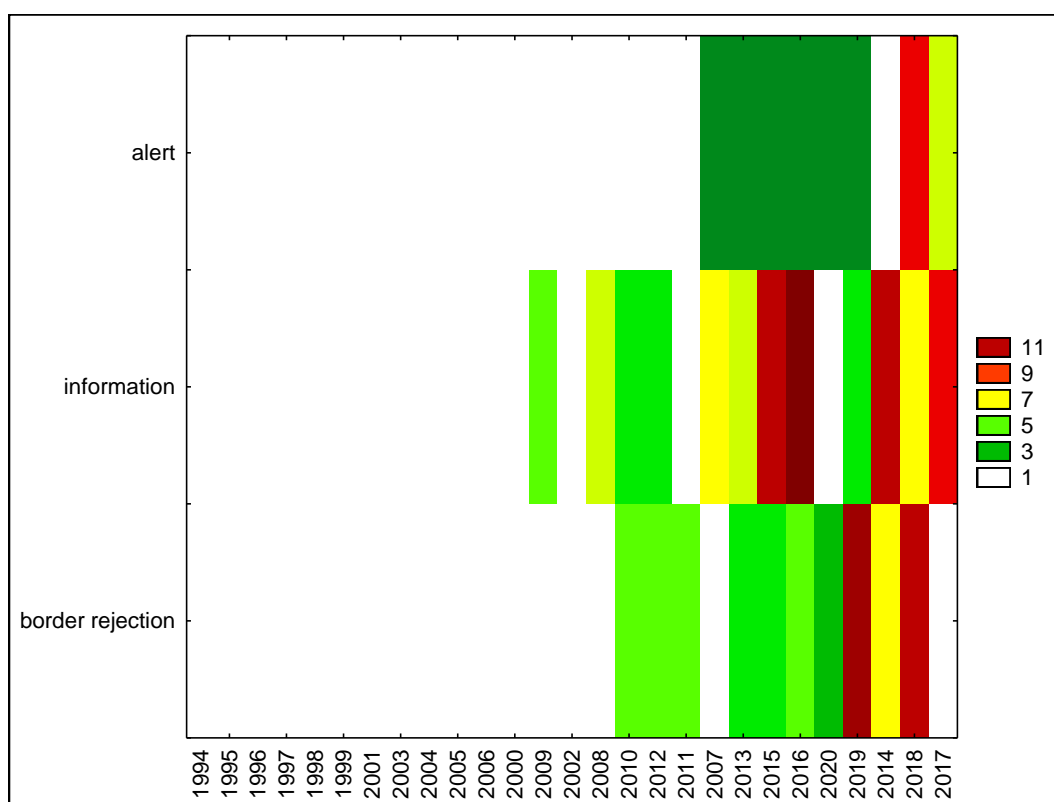

**Figure S5a.** Results of two-way joining cluster analysis for carbofuran (notification type)

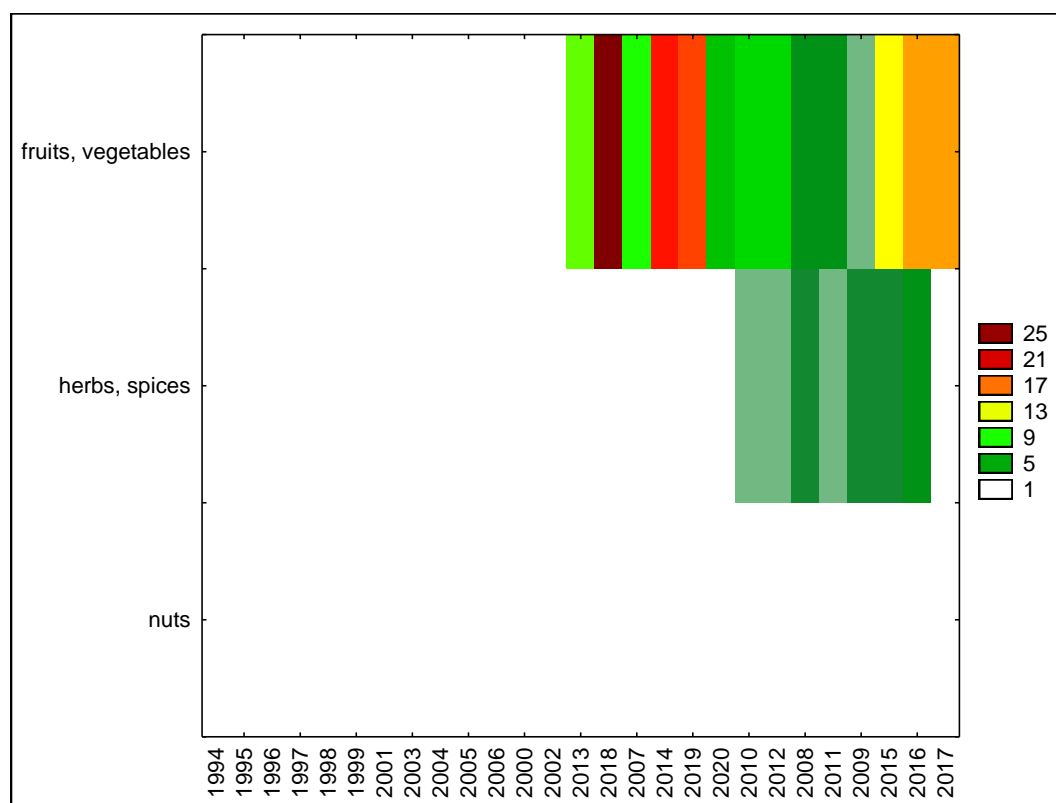

**Figure S5b.** Results of two-way joining cluster analysis for carbofuran (product category)

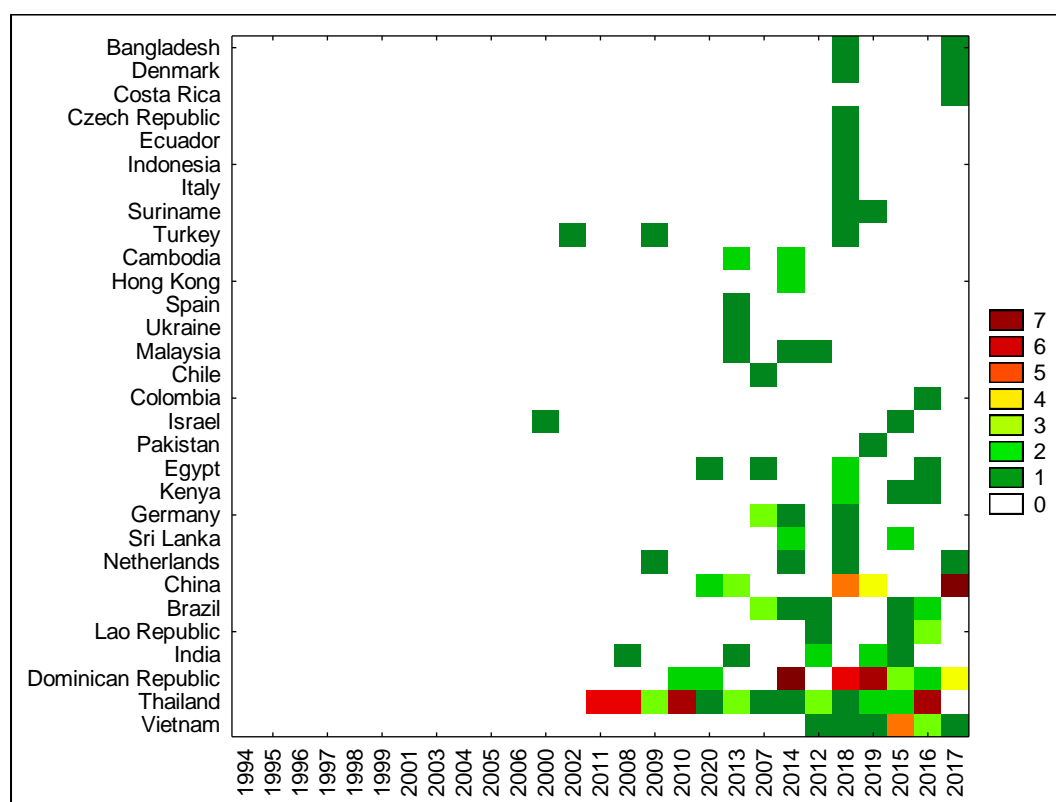

**Figure S5c.** Results of two-way joining cluster analysis for carbofuran (origin country)

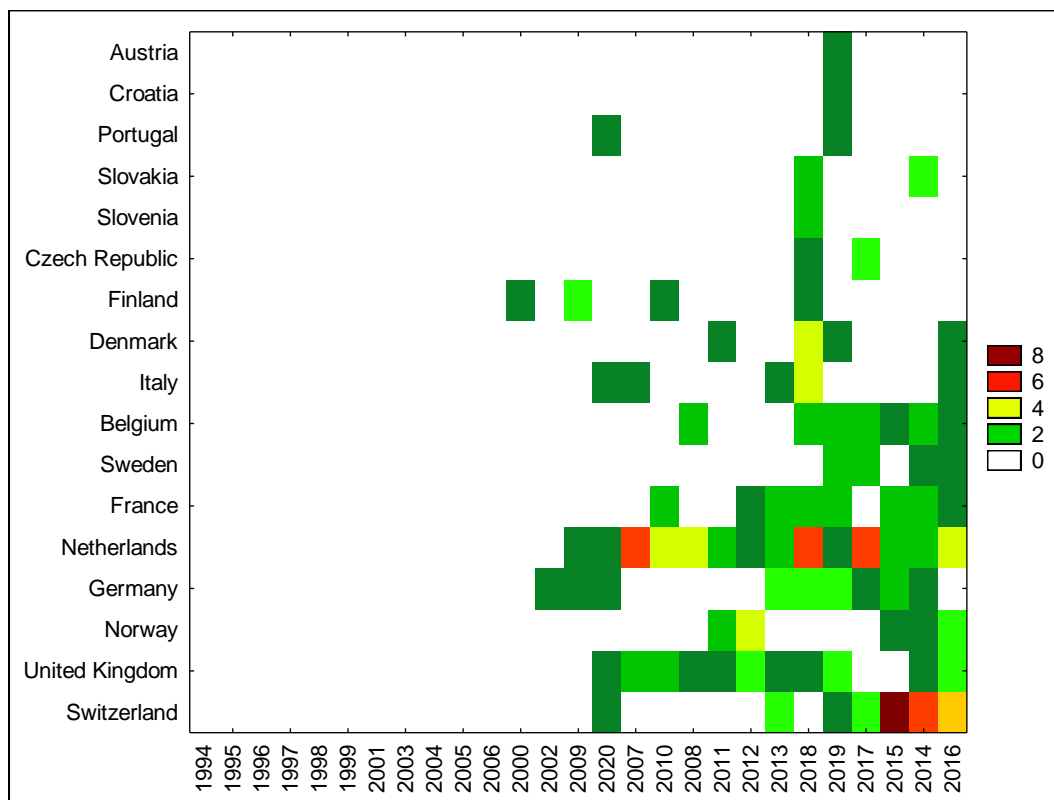

**Figure S5d.** Results of two-way joining cluster analysis for carbofuran (notifying country)

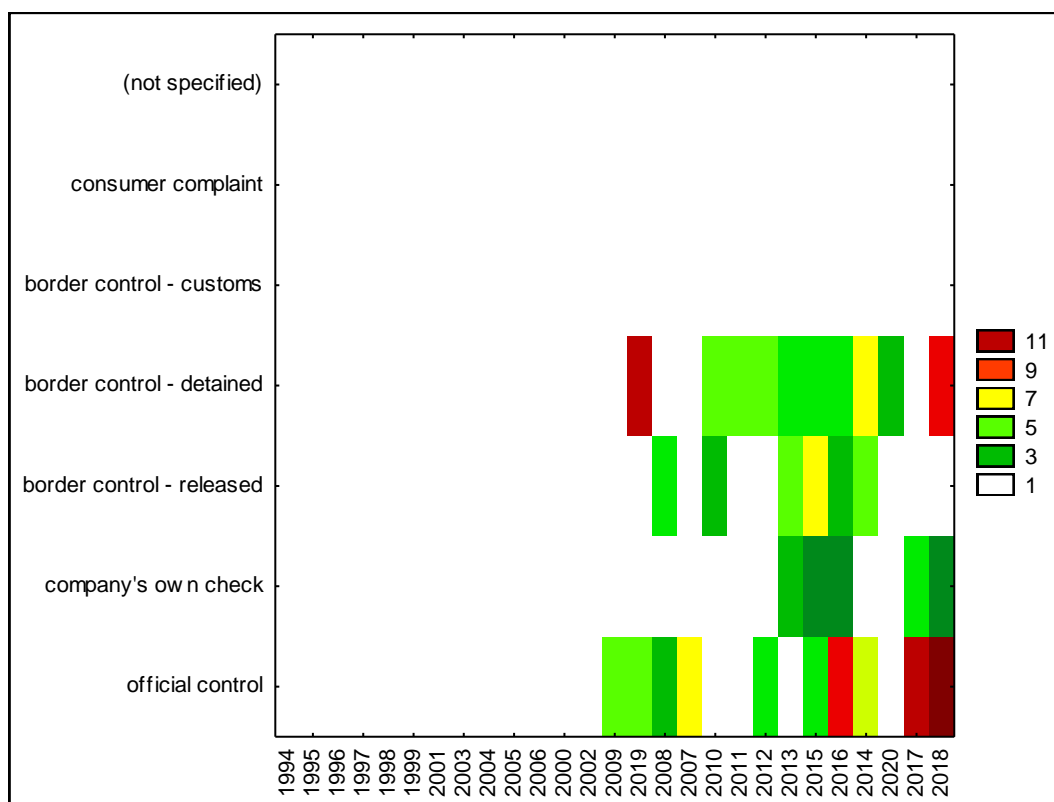

**Figure S5e.** Results of two-way joining cluster analysis for carbofuran (notification basis)

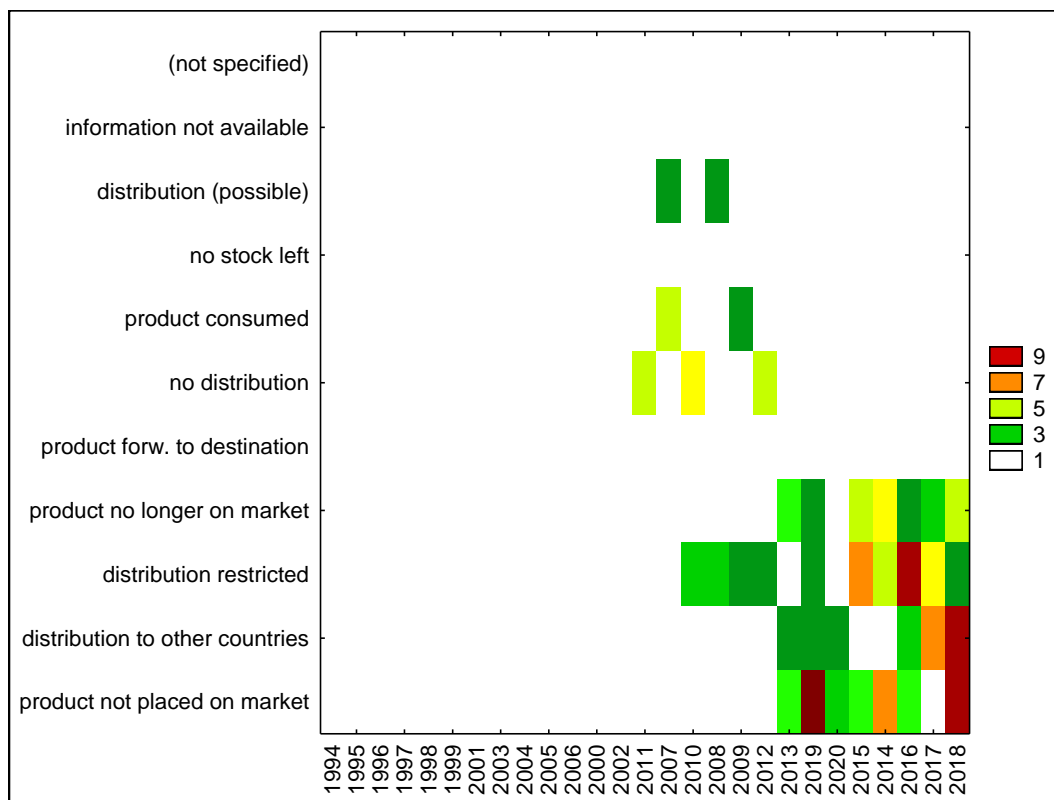

**Figure S5f.** Results of two-way joining cluster analysis for carbofuran (distribution status)

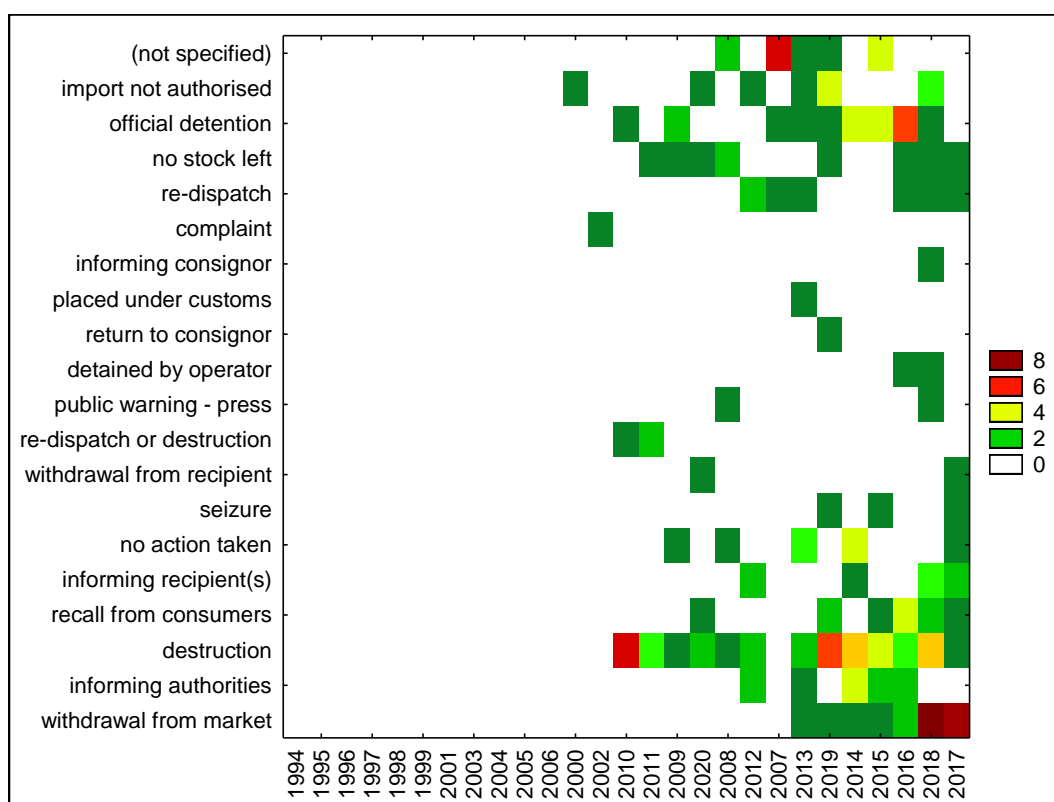

**Figure S5g.** Results of two-way joining cluster analysis for carbofuran (action taken)

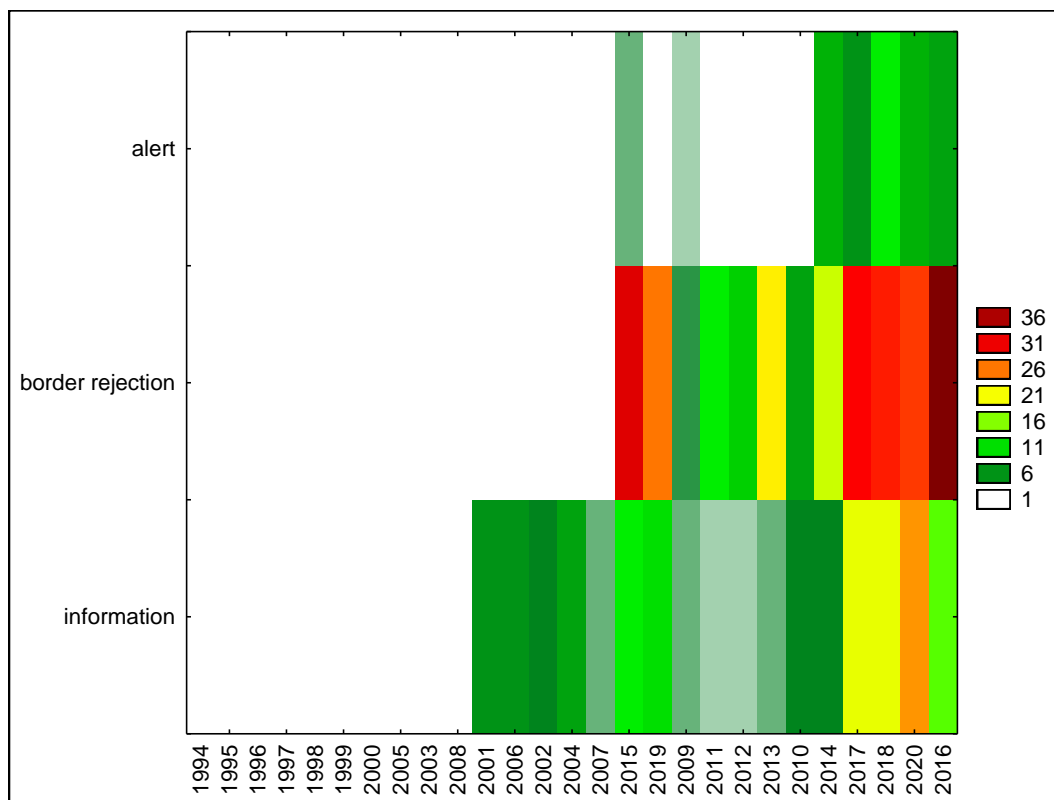

**Figure S6a.** Results of two-way joining cluster analysis for chlorpyrifos (notification type)

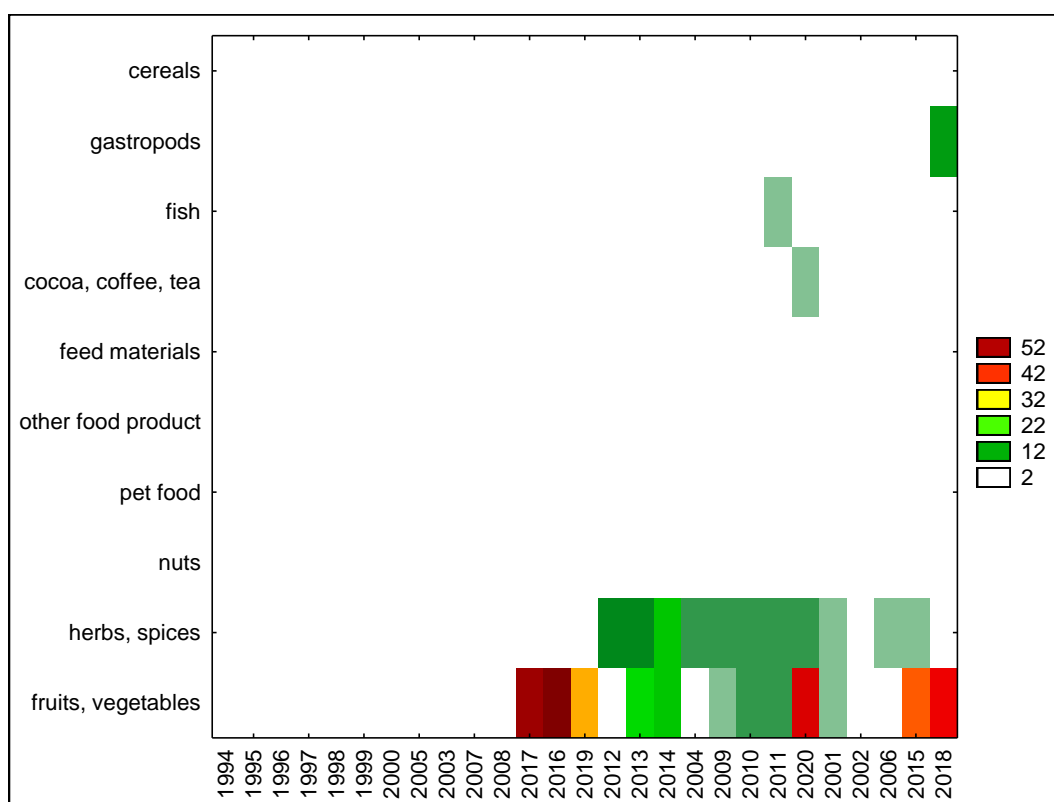

**Figure S6b.** Results of two-way joining cluster analysis for chlorpyrifos (product category)

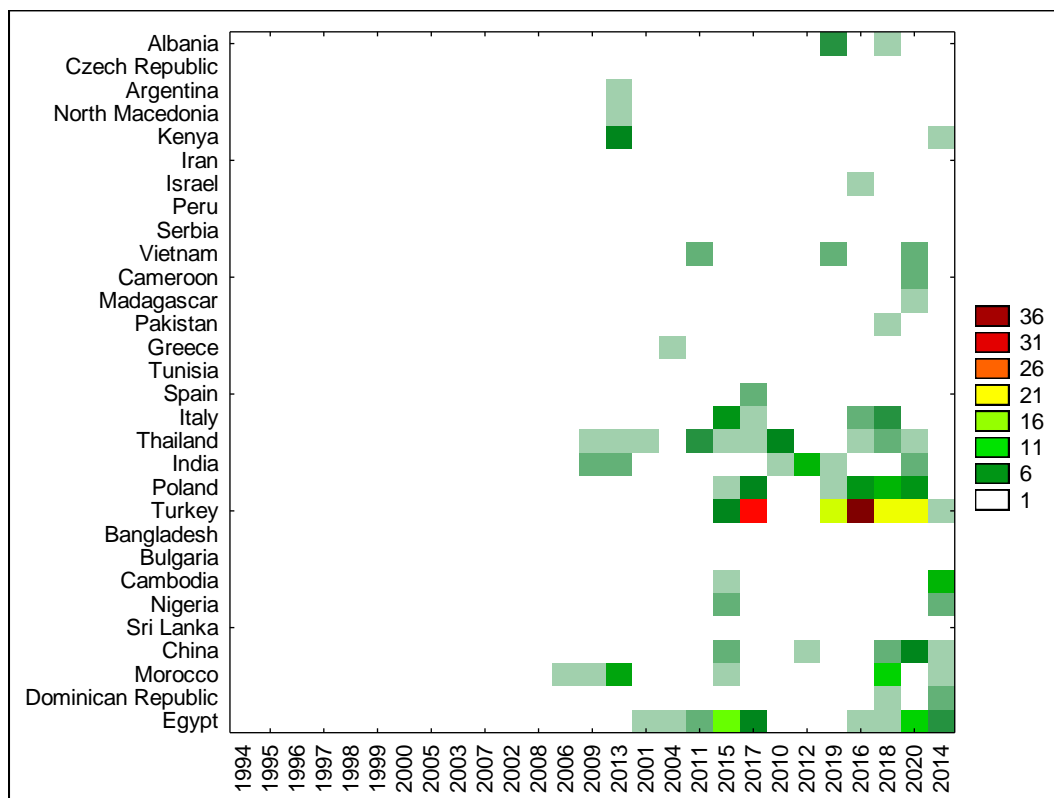

**Figure S6c.** Results of two-way joining cluster analysis for chlorpyrifos (origin country)

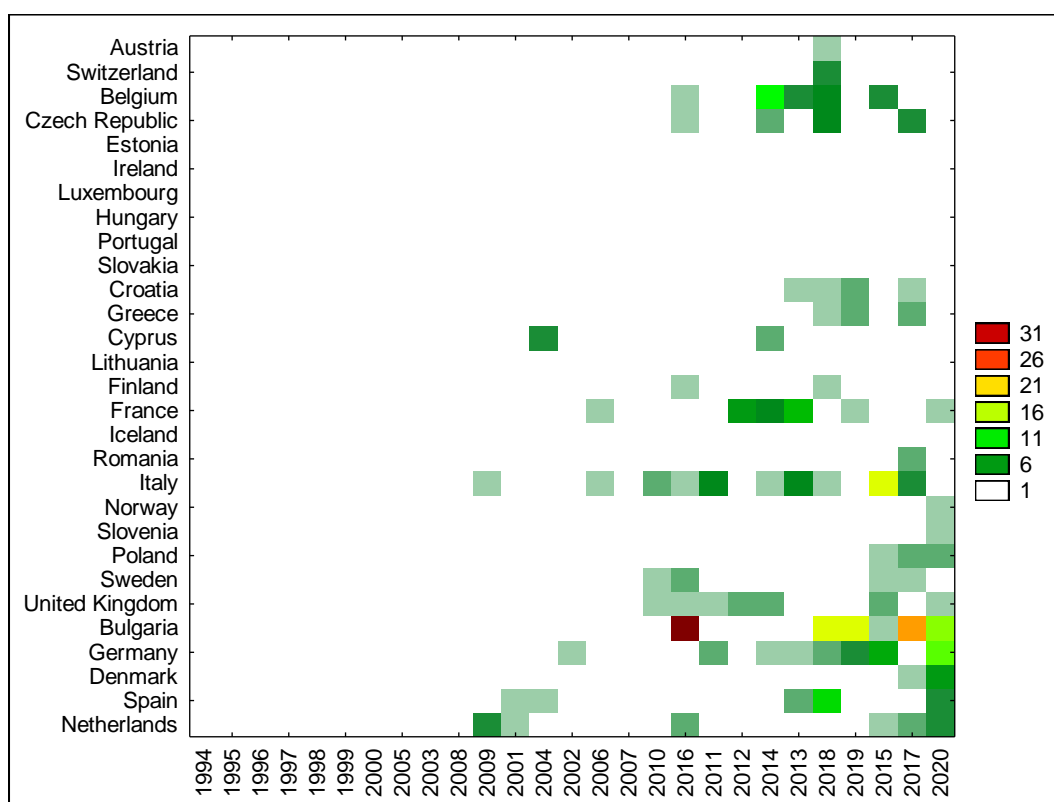

**Figure S6d.** Results of two-way joining cluster analysis for chlorpyrifos (notifying country)



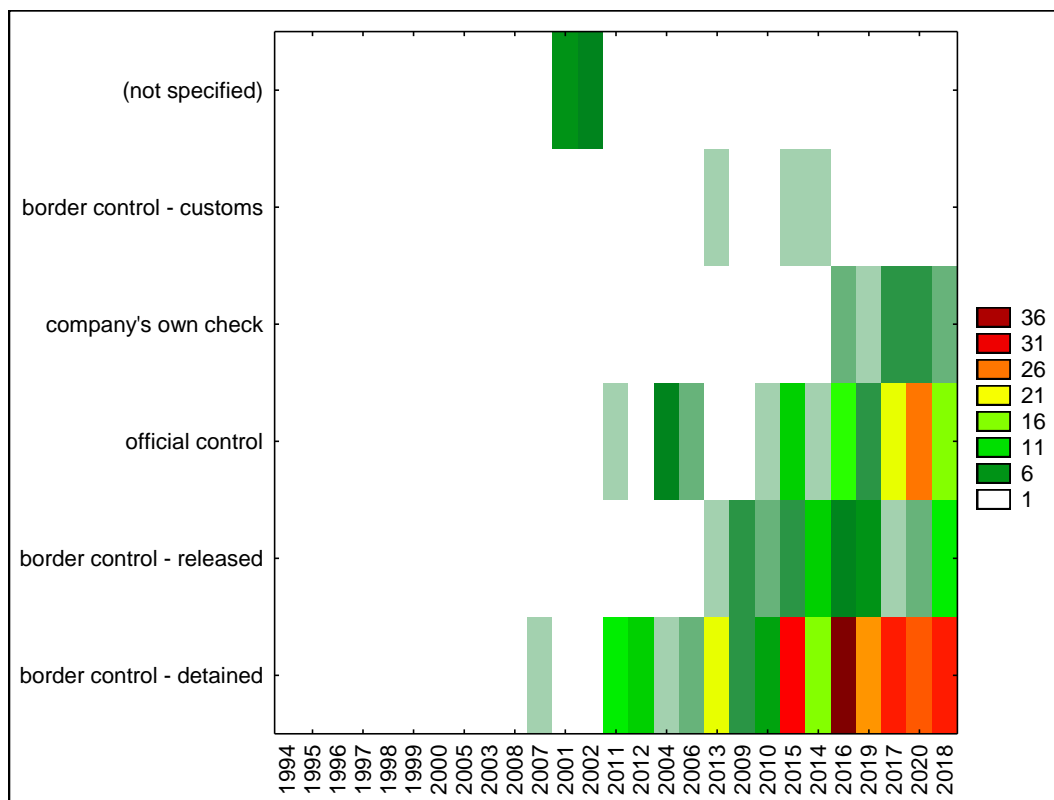

**Figure S6e.** Results of two-way joining cluster analysis for chlorpyrifos (notification basis)

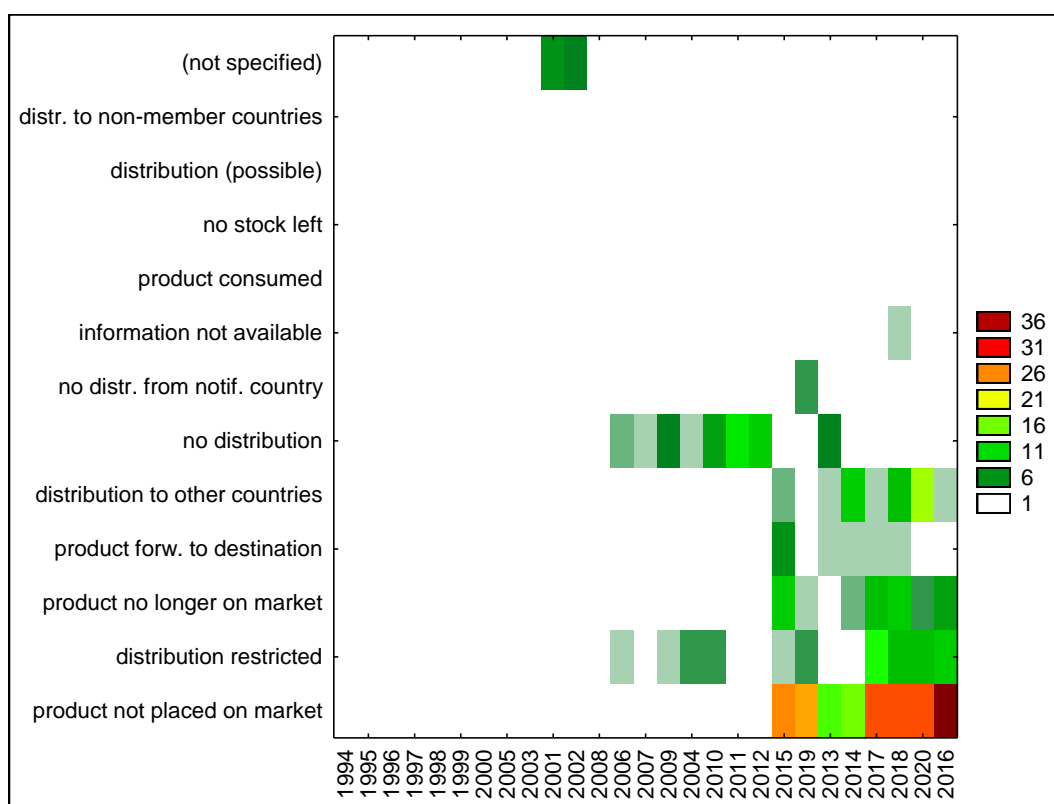

**Figure S6f.** Results of two-way joining cluster analysis for chlorpyrifos (distribution status)

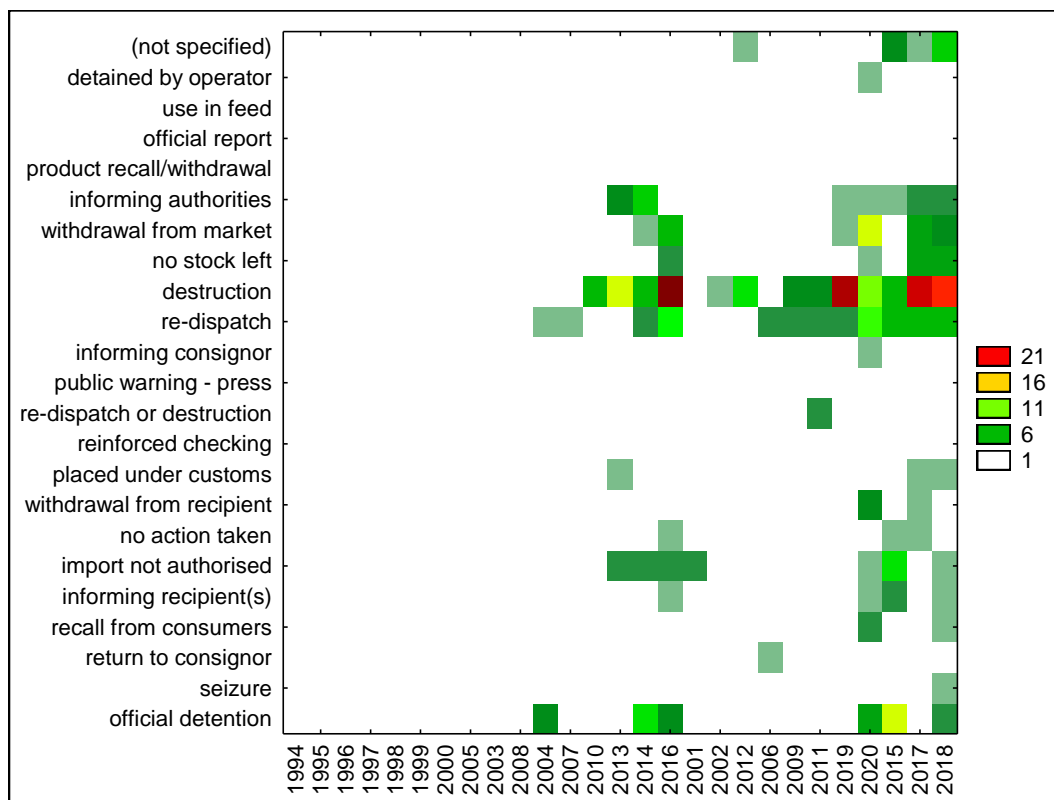

**Figure S6g.** Results of two-way joining cluster analysis for chlorpyrifos (action taken)

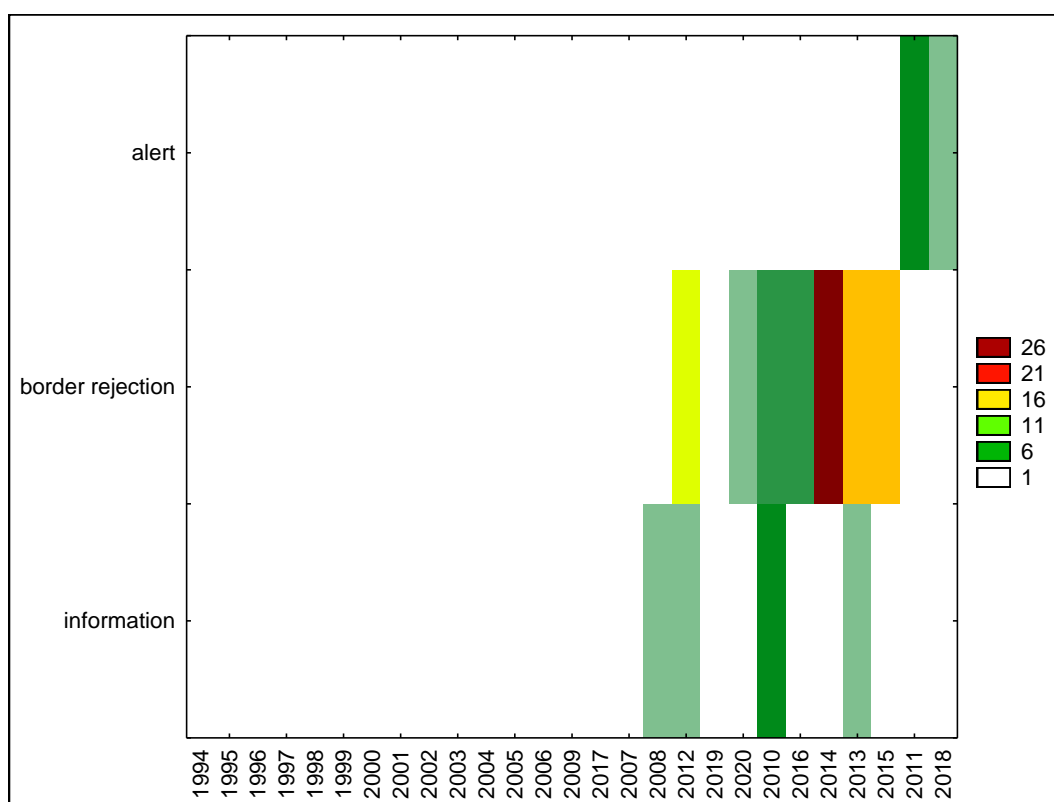

**Figure S7a.** Results of two-way joining cluster analysis for dichlorvos (notification type)

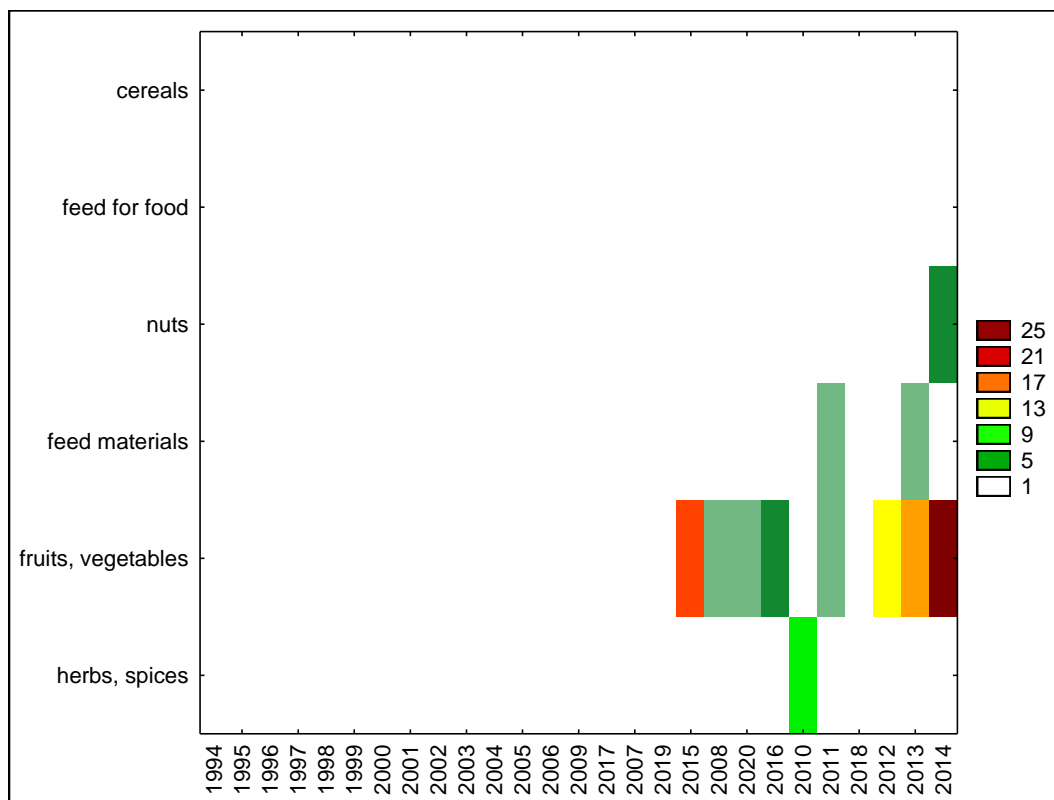

**Figure S7b.** Results of two-way joining cluster analysis for dichlorvos (product category)

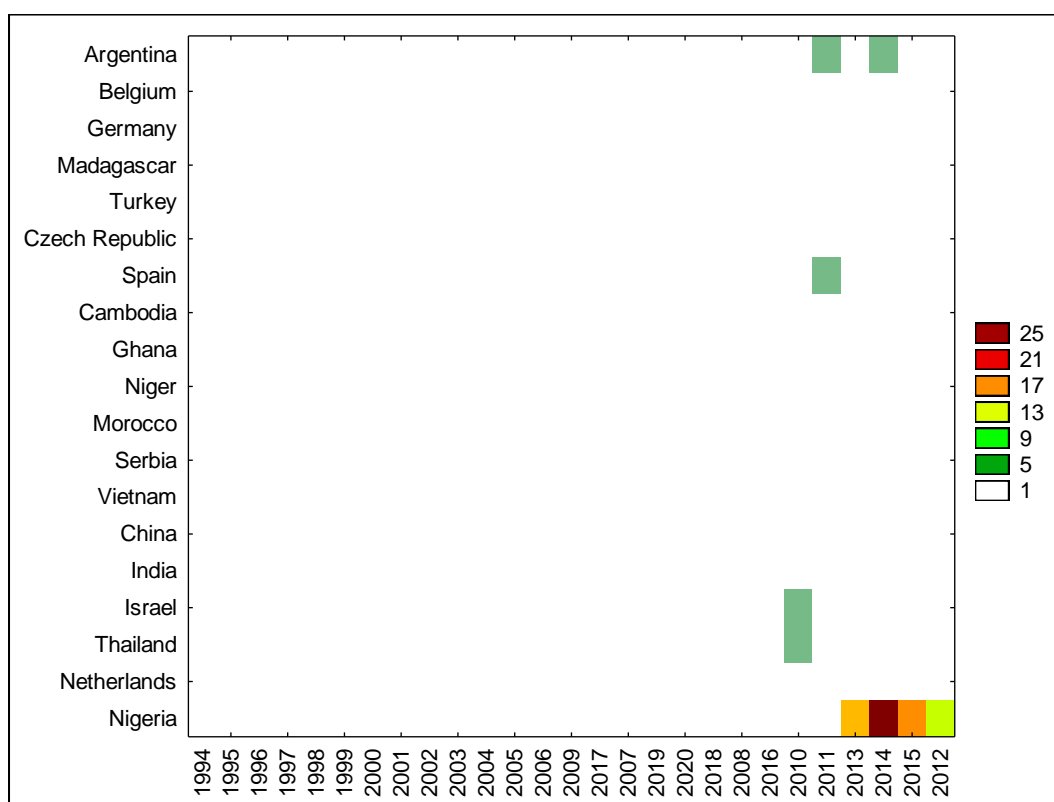

**Figure S7c.** Results of two-way joining cluster analysis for dichlorvos (origin country)

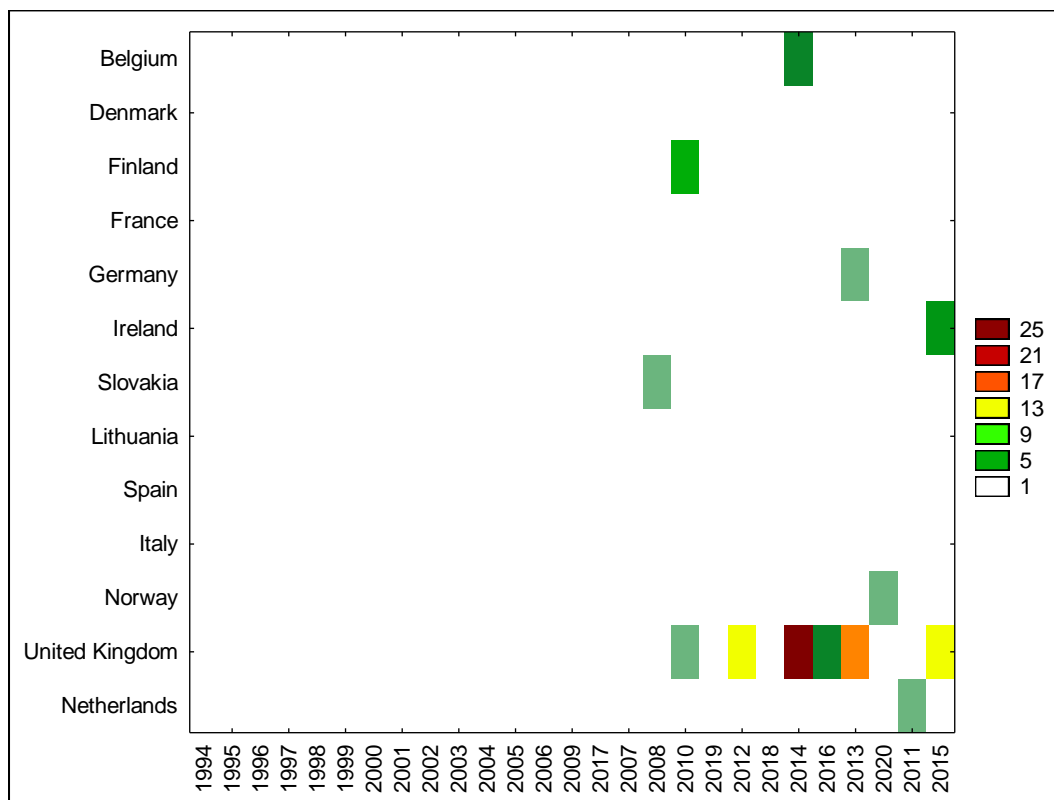

**Figure S7d.** Results of two-way joining cluster analysis for dichlorvos (notifying country)

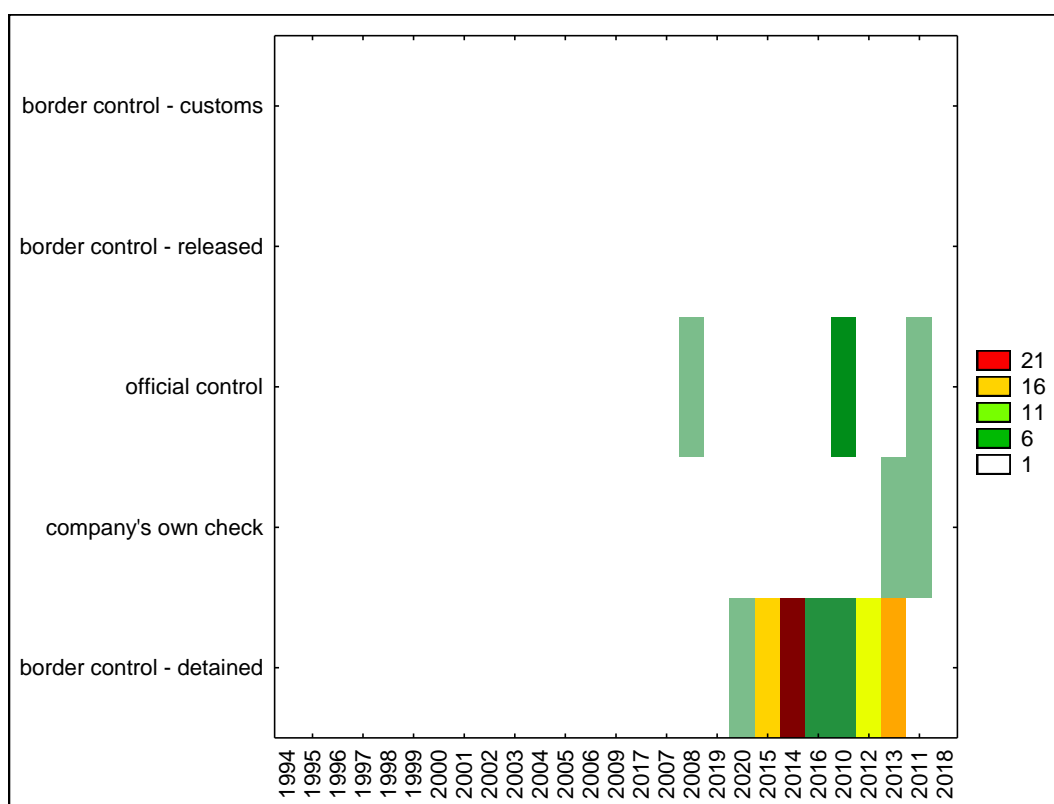

**Figure S7e.** Results of two-way joining cluster analysis for dichlorvos (notification basis)

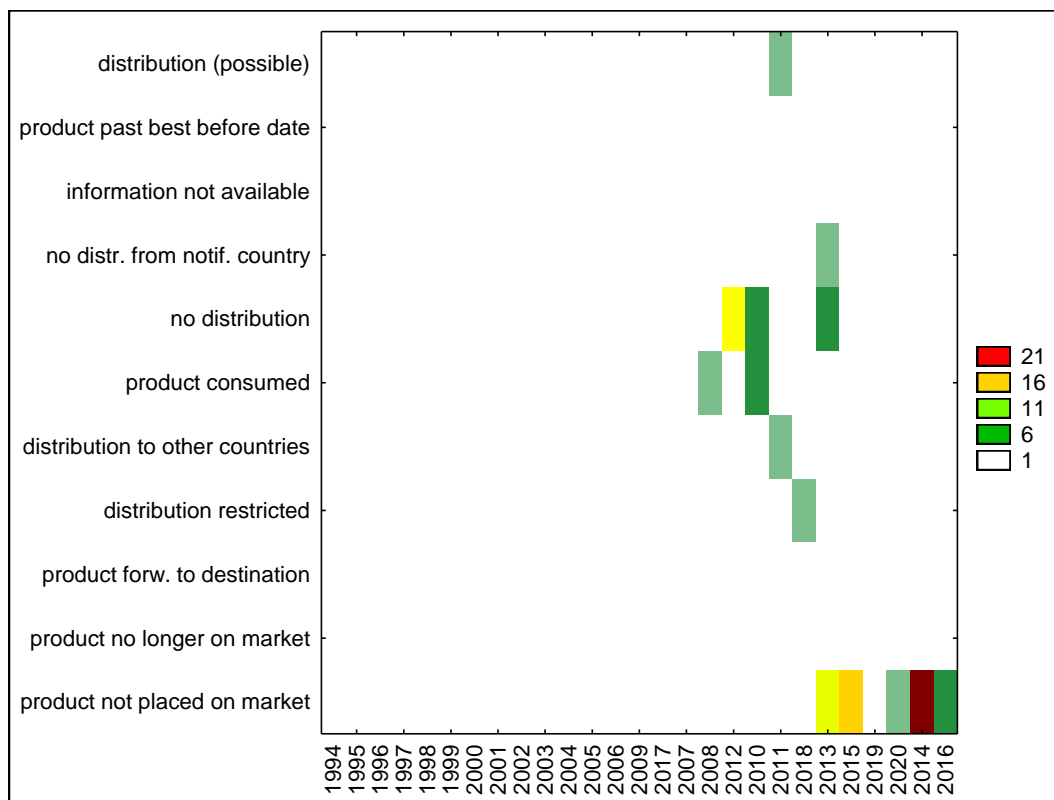

**Figure S7f.** Results of two-way joining cluster analysis for dichlorvos (distribution status)

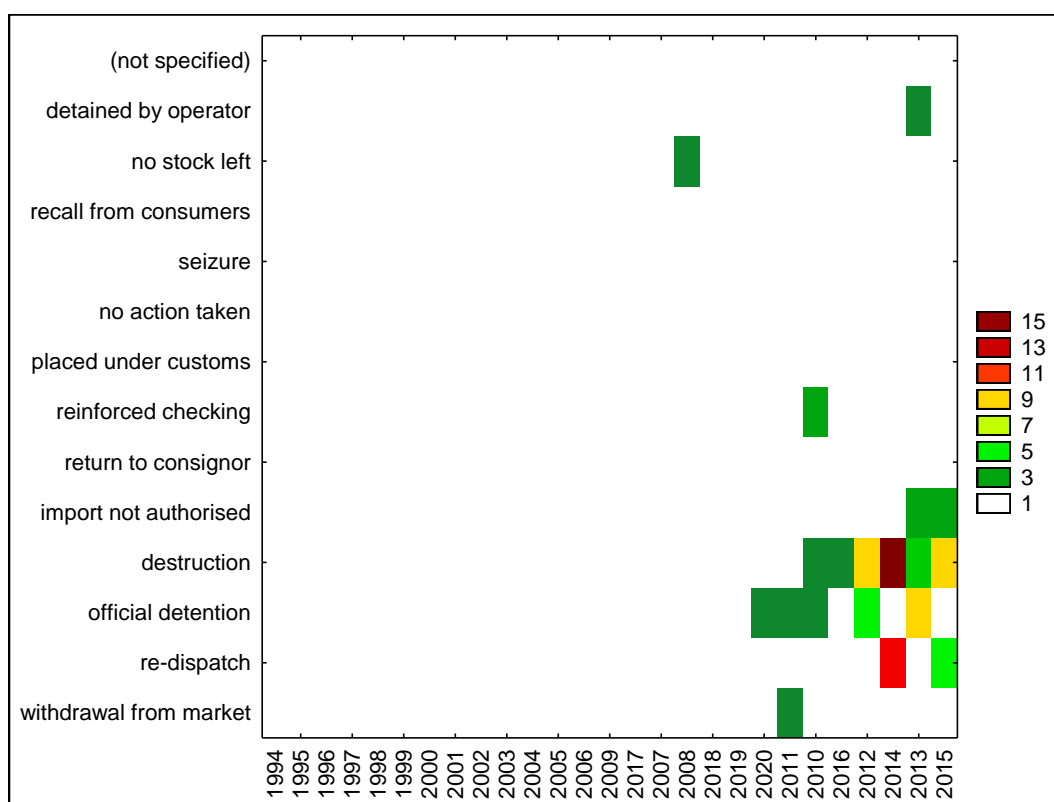

**Figure S7g.** Results of two-way joining cluster analysis for dichlorvos (action taken)

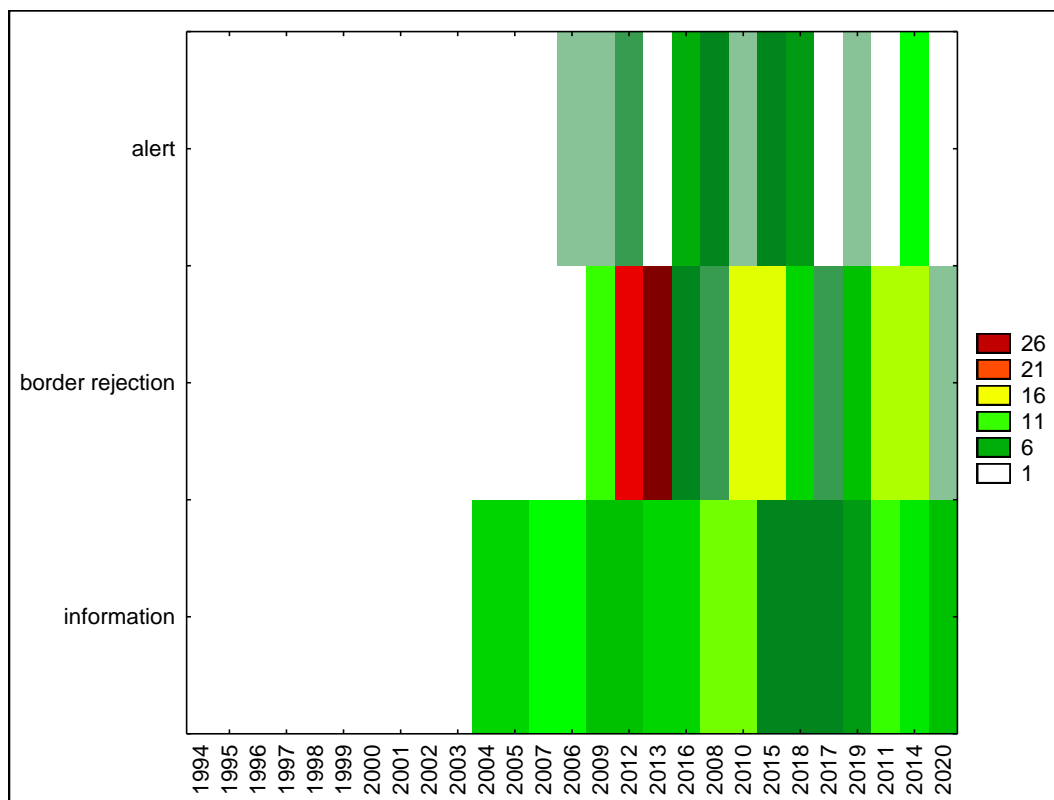

**Figure S8a.** Results of two-way joining cluster analysis for dimethoate (notification type)

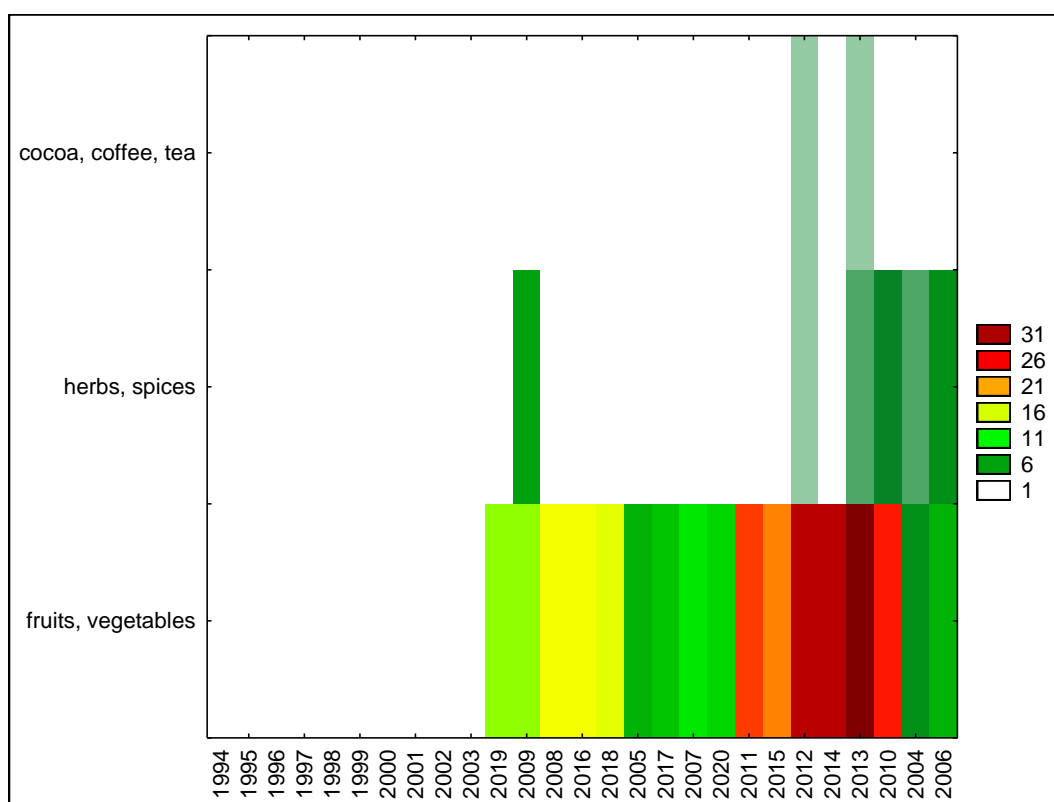

**Figure S8b.** Results of two-way joining cluster analysis for dimethoate (product category)

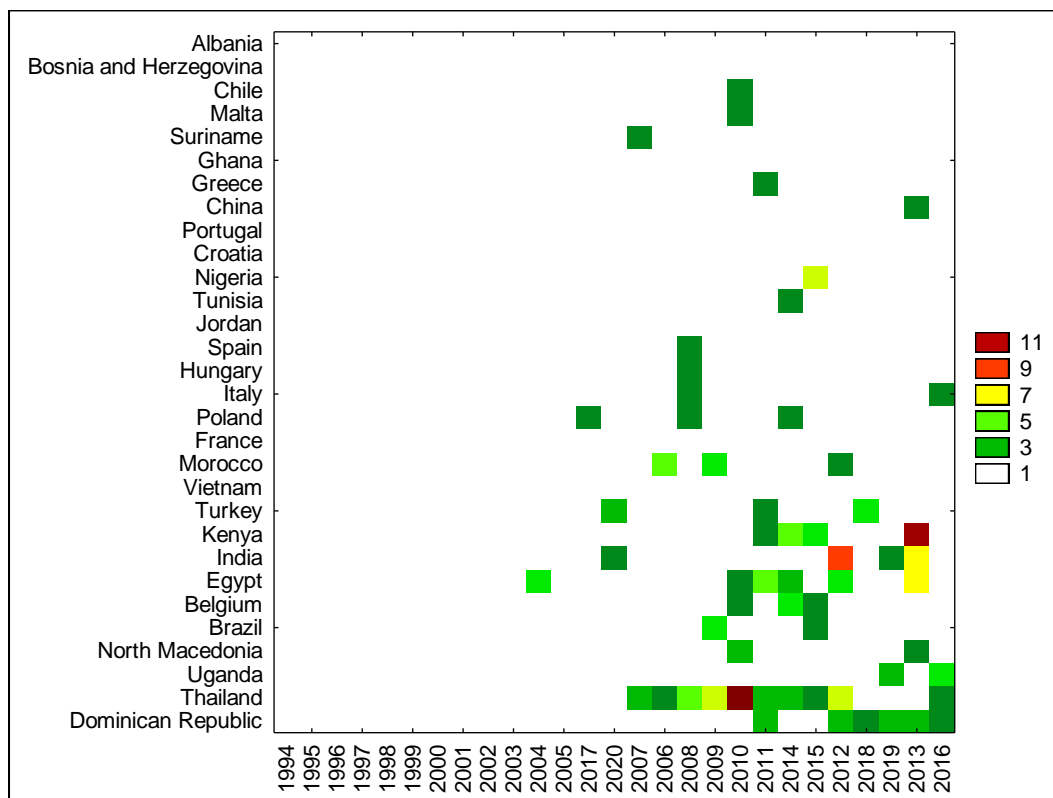

**Figure S8c.** Results of two-way joining cluster analysis for dimethoate (origin country)

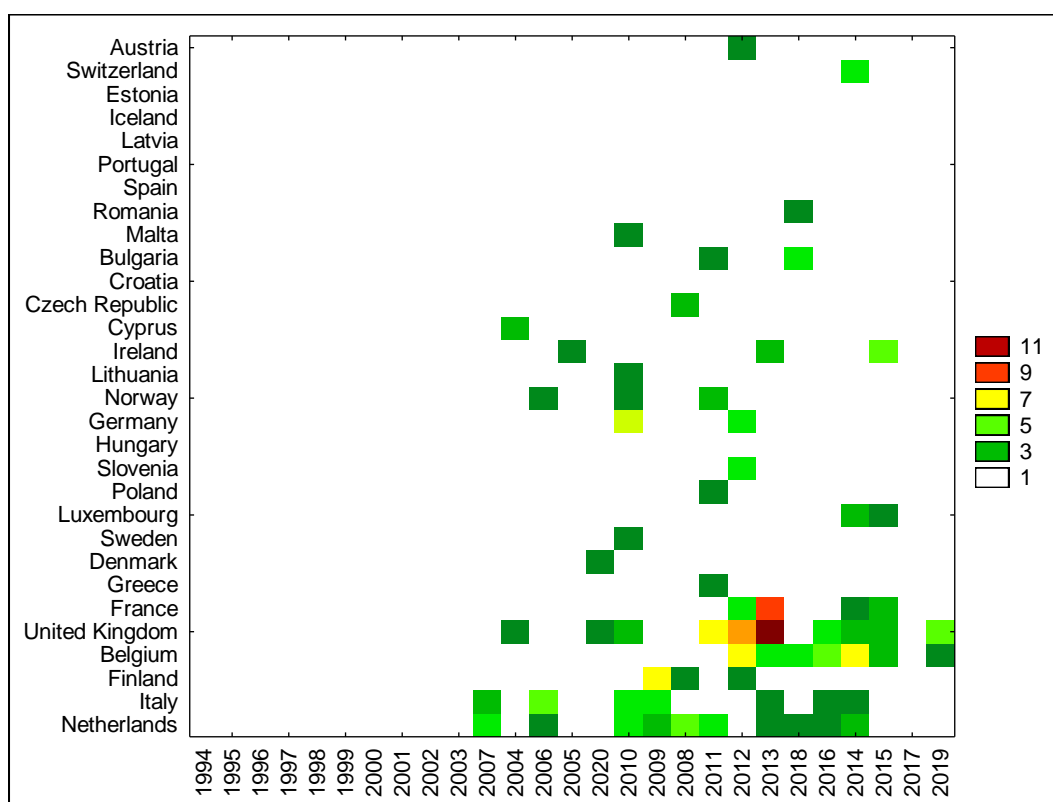

**Figure S8d.** Results of two-way joining cluster analysis for dimethoate (notifying country)

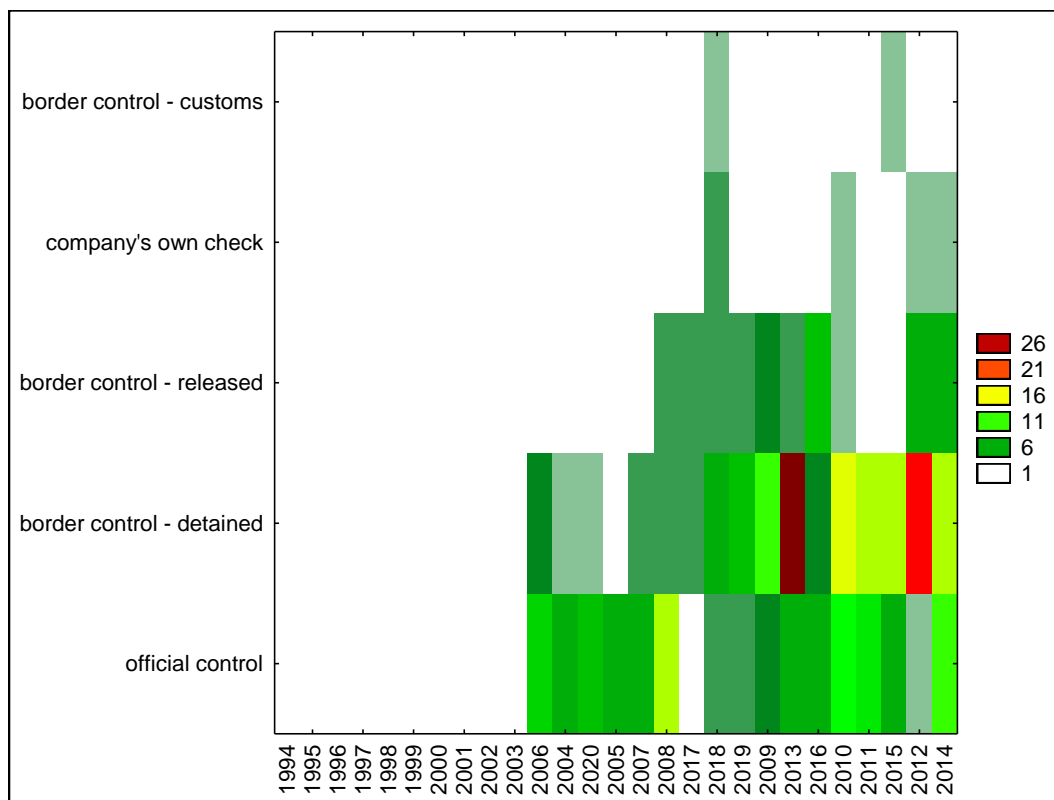

**Figure S8e.** Results of two-way joining cluster analysis for dimethoate (notification basis)

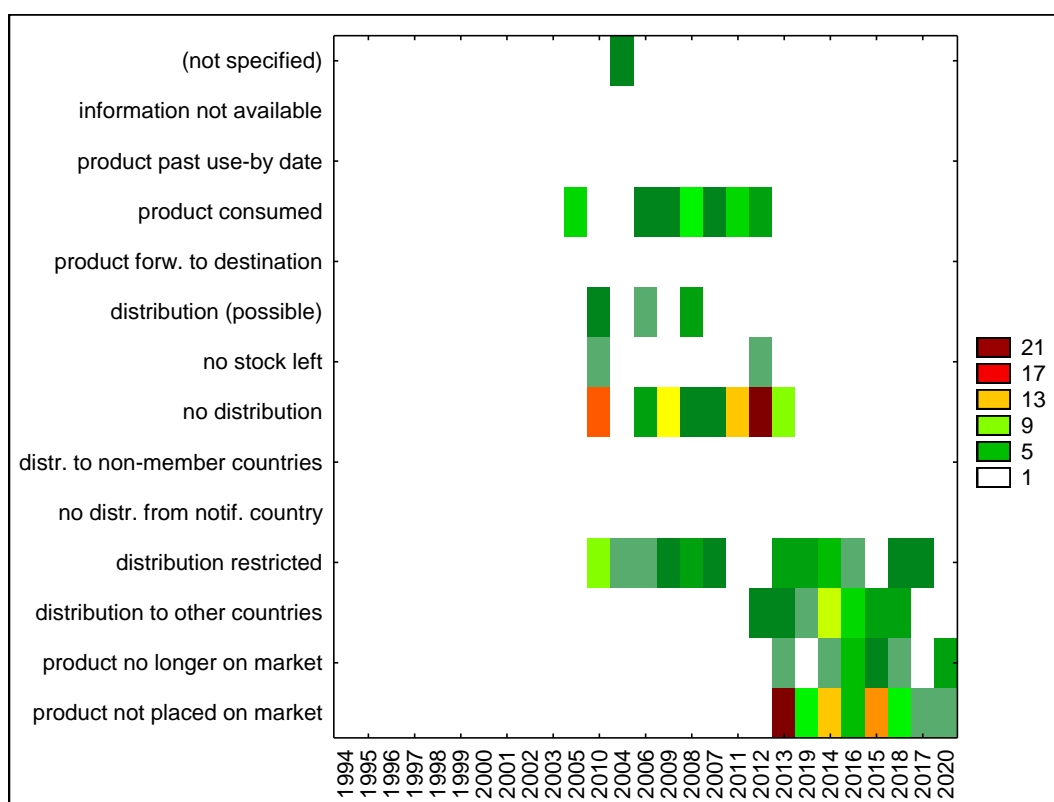

**Figure S8f.** Results of two-way joining cluster analysis for dimethoate (distribution status)



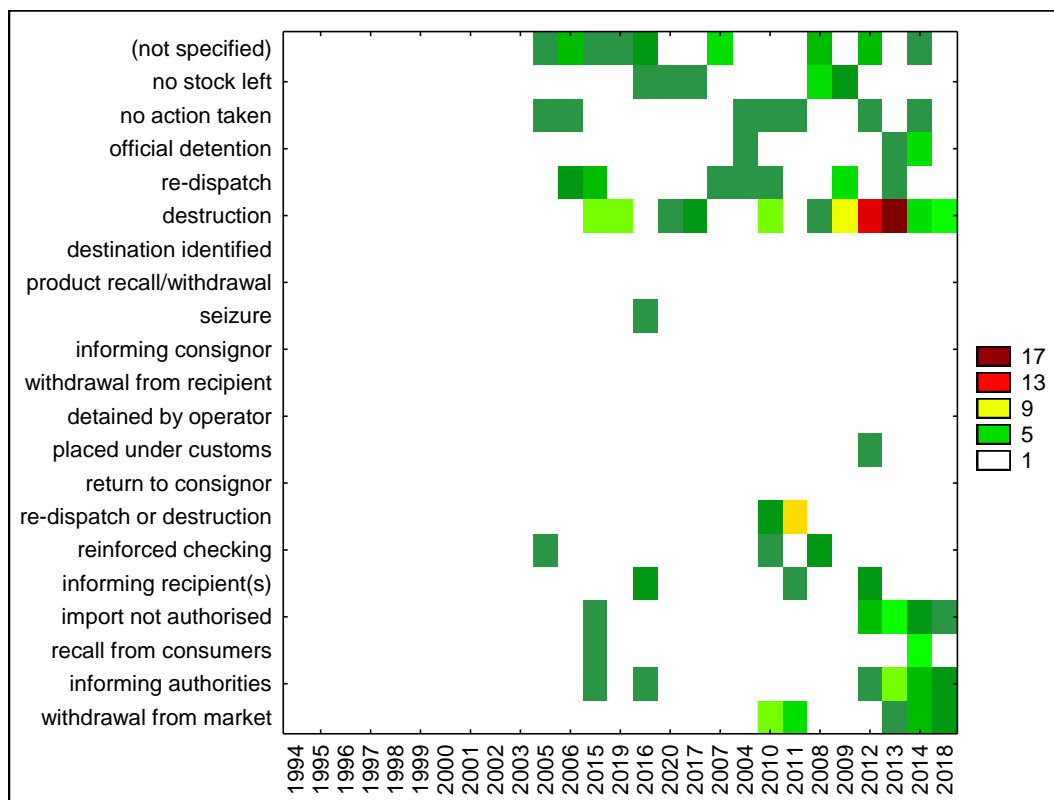

**Figure S8g.** Results of two-way joining cluster analysis for dimethoate (action taken)

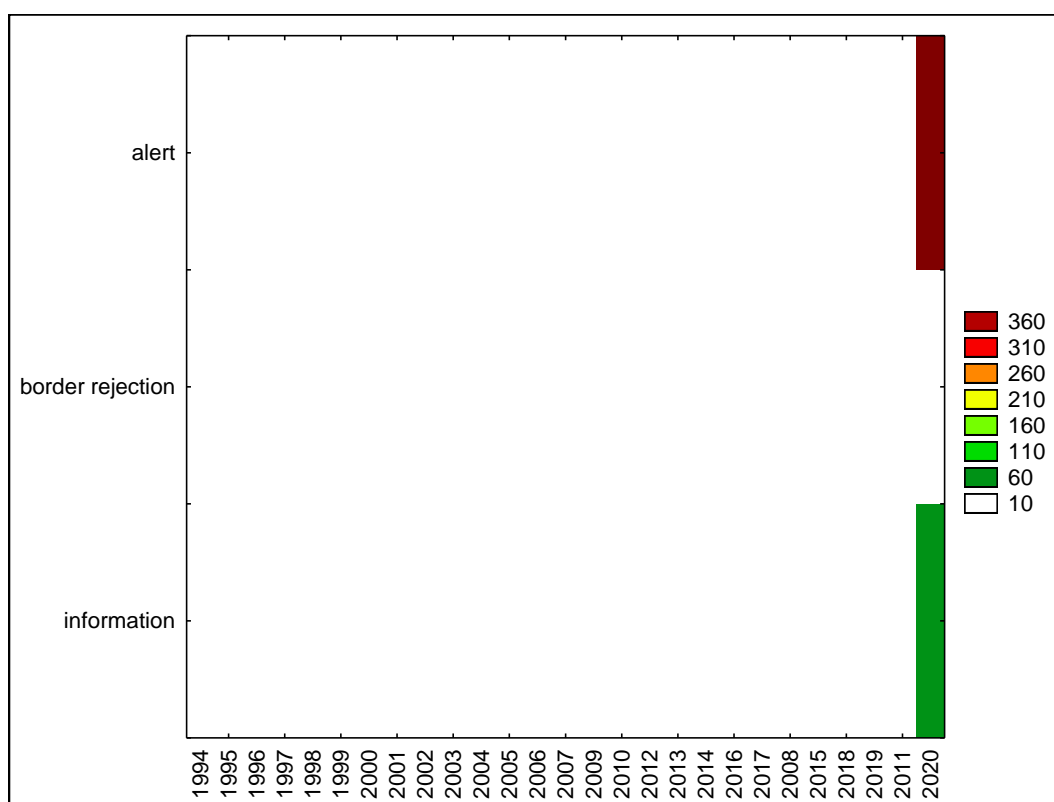

**Figure S9a.** Results of two-way joining cluster analysis for ethylene oxide (notification type)

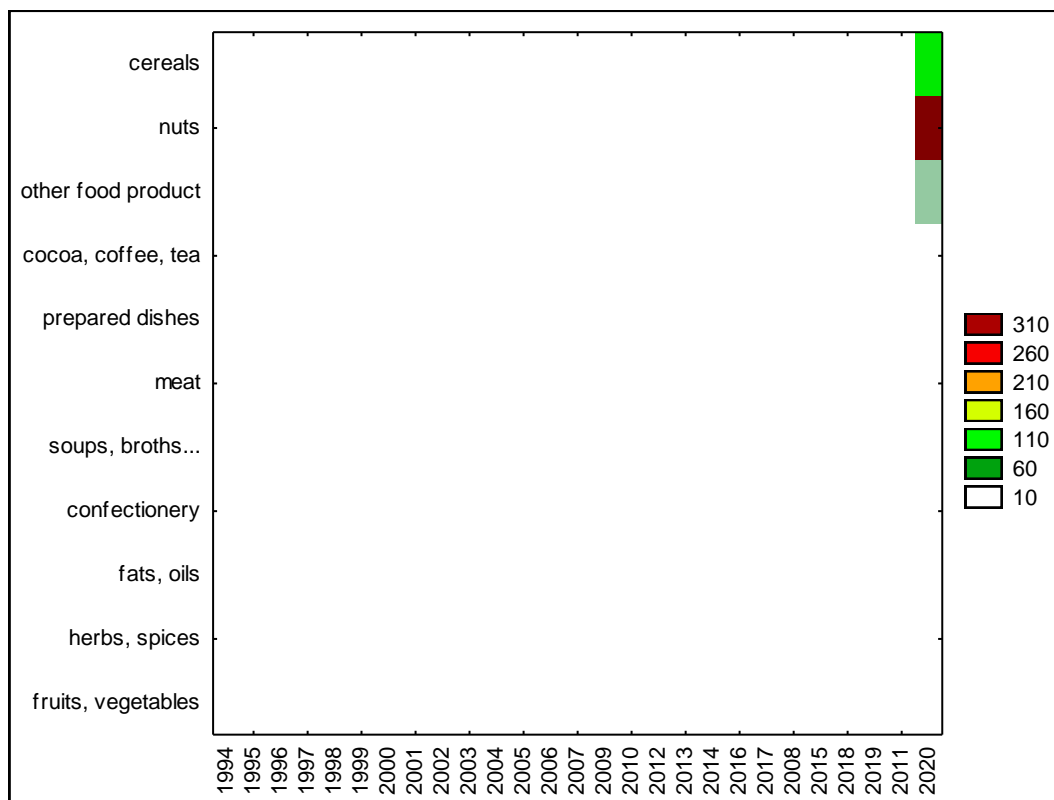

**Figure S9b.** Results of two-way joining cluster analysis for ethylene oxide (product category)

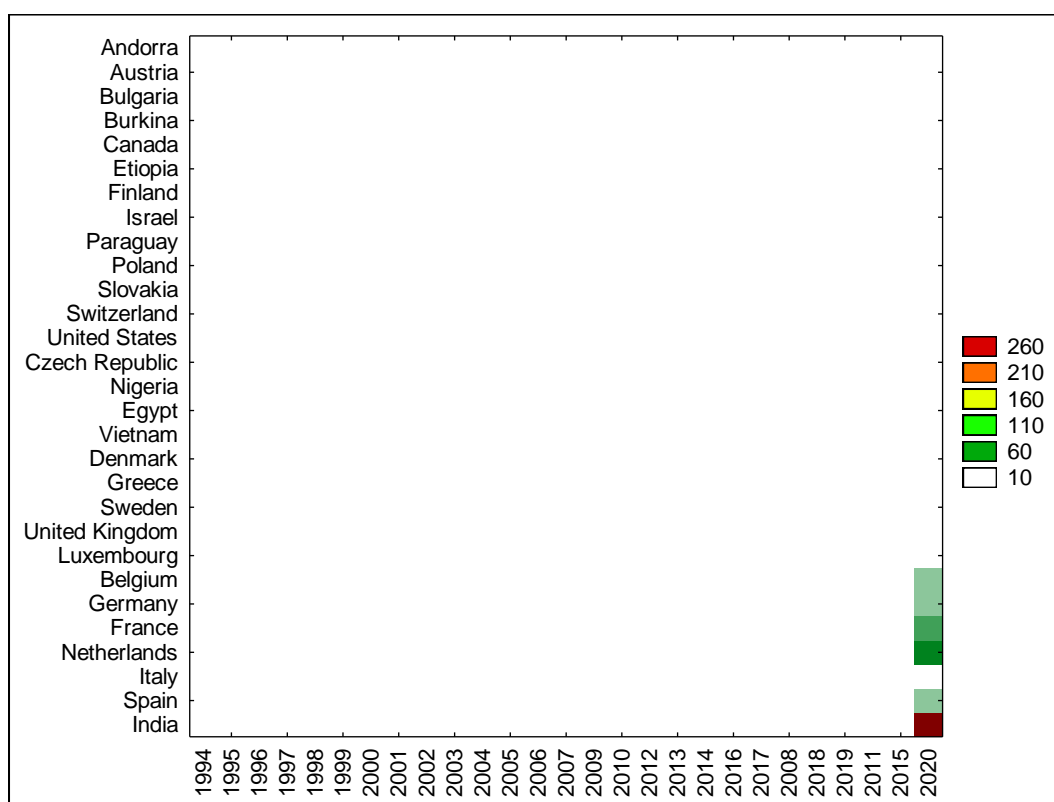

**Figure S9c.** Results of two-way joining cluster analysis for ethylene oxide (origin country)

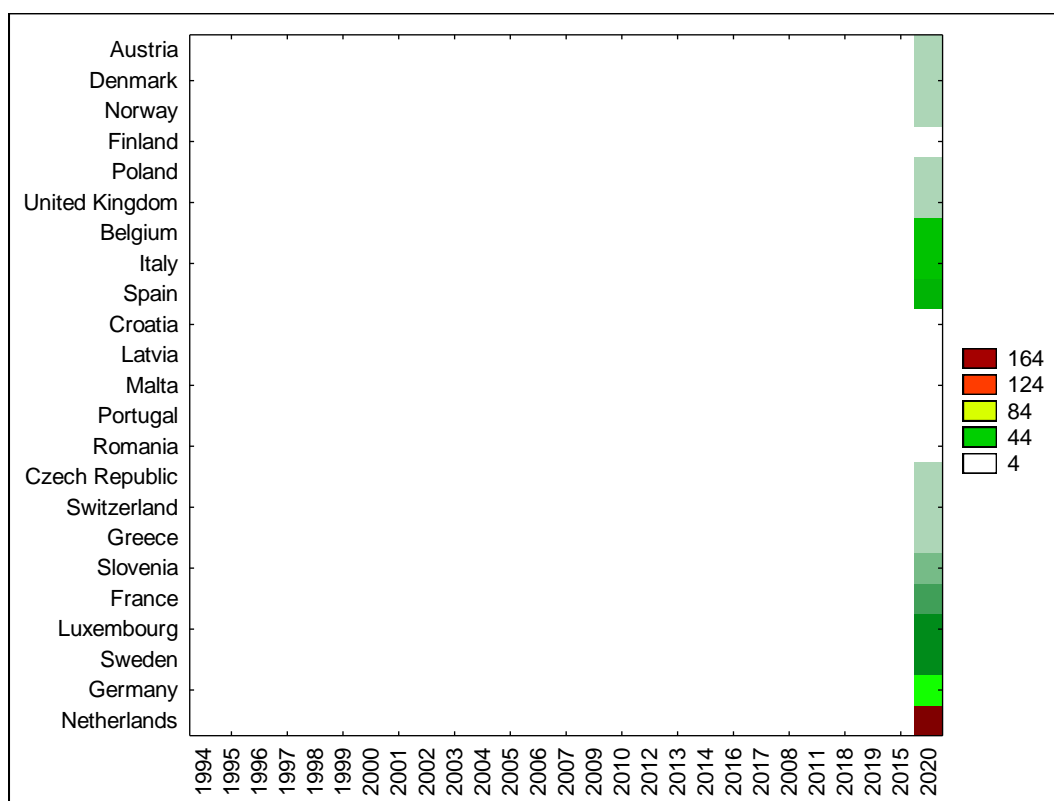

**Figure S9d.** Results of two-way joining cluster analysis for ethylene oxide (notifying country)

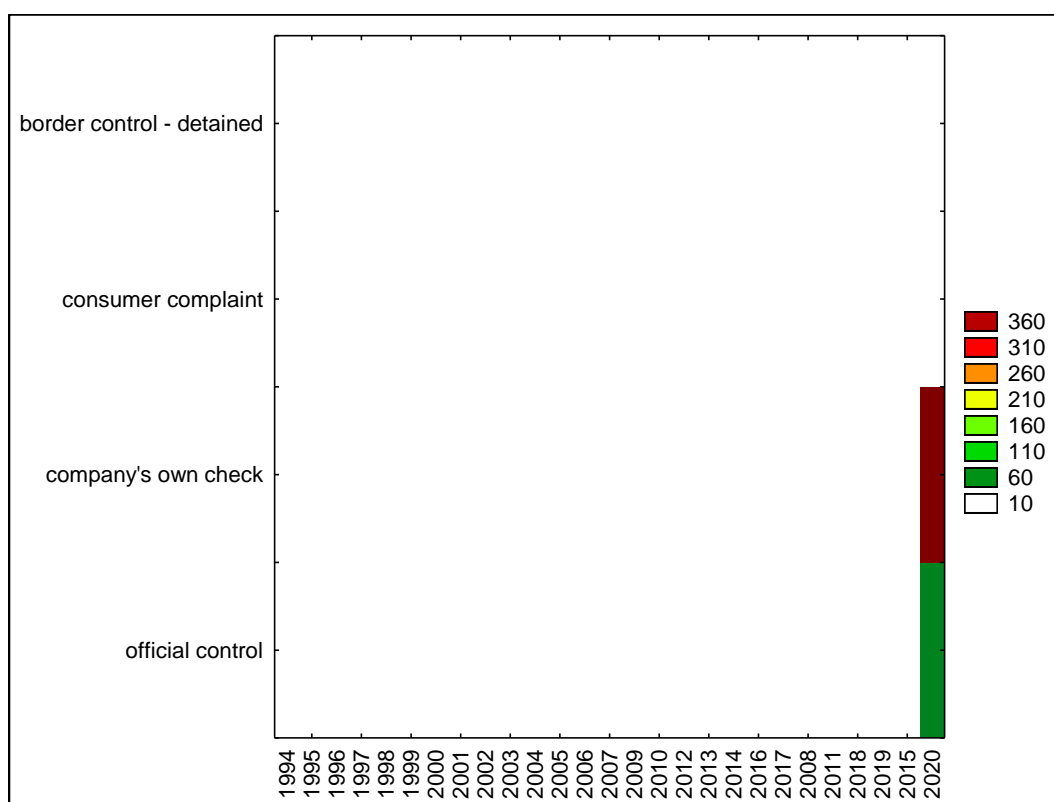

**Figure S9e.** Results of two-way joining cluster analysis for ethylene oxide (notification basis)

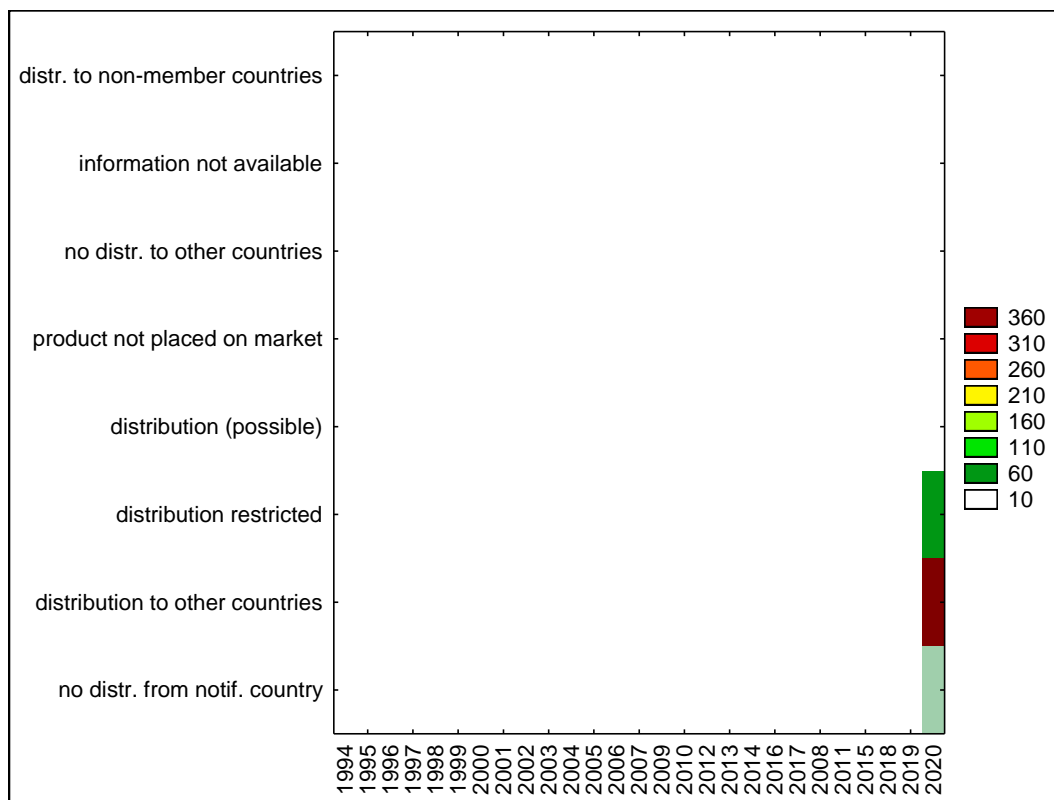

**Figure S9f.** Results of two-way joining cluster analysis for ethylene oxide (distribution status)

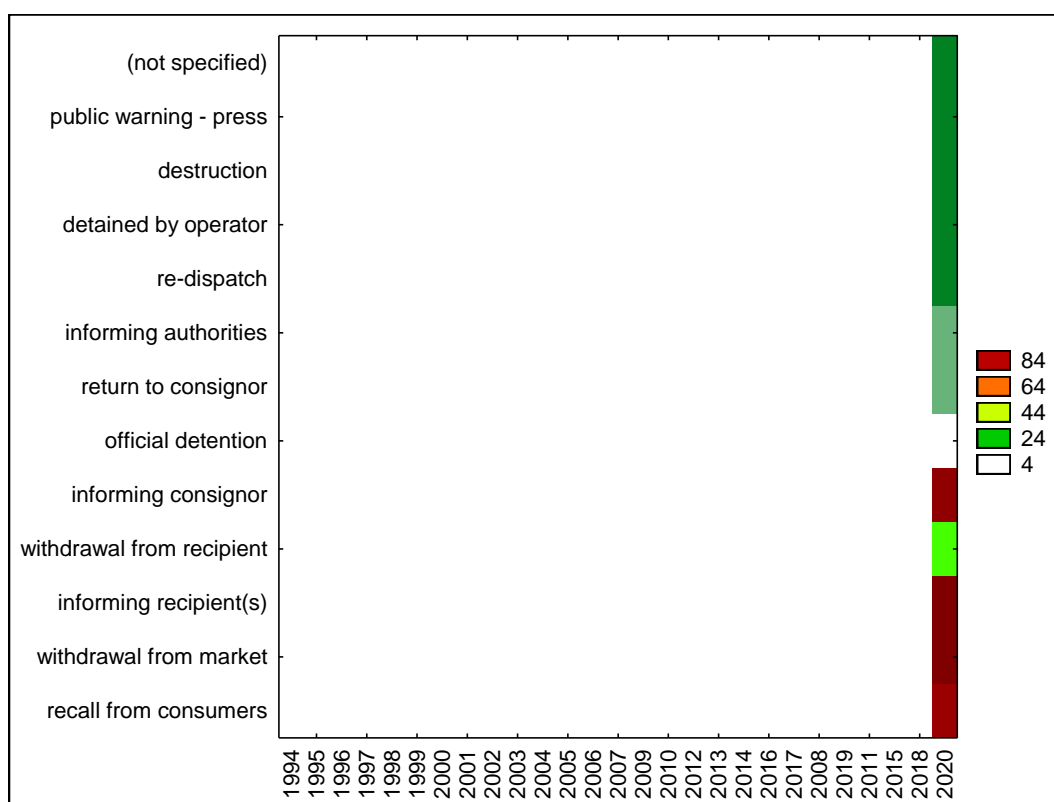

**Figure S9g.** Results of two-way joining cluster analysis for ethylene oxide (action taken)

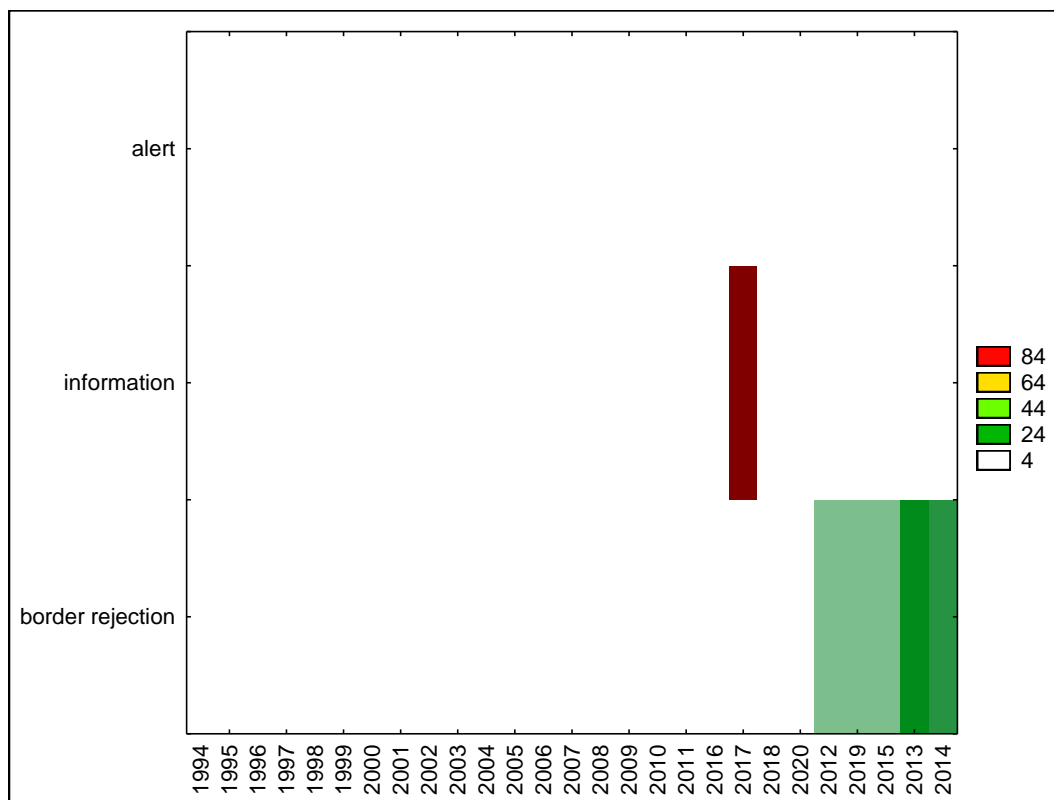

**Figure S10a.** Results of two-way joining cluster analysis for fipronil (notification type)

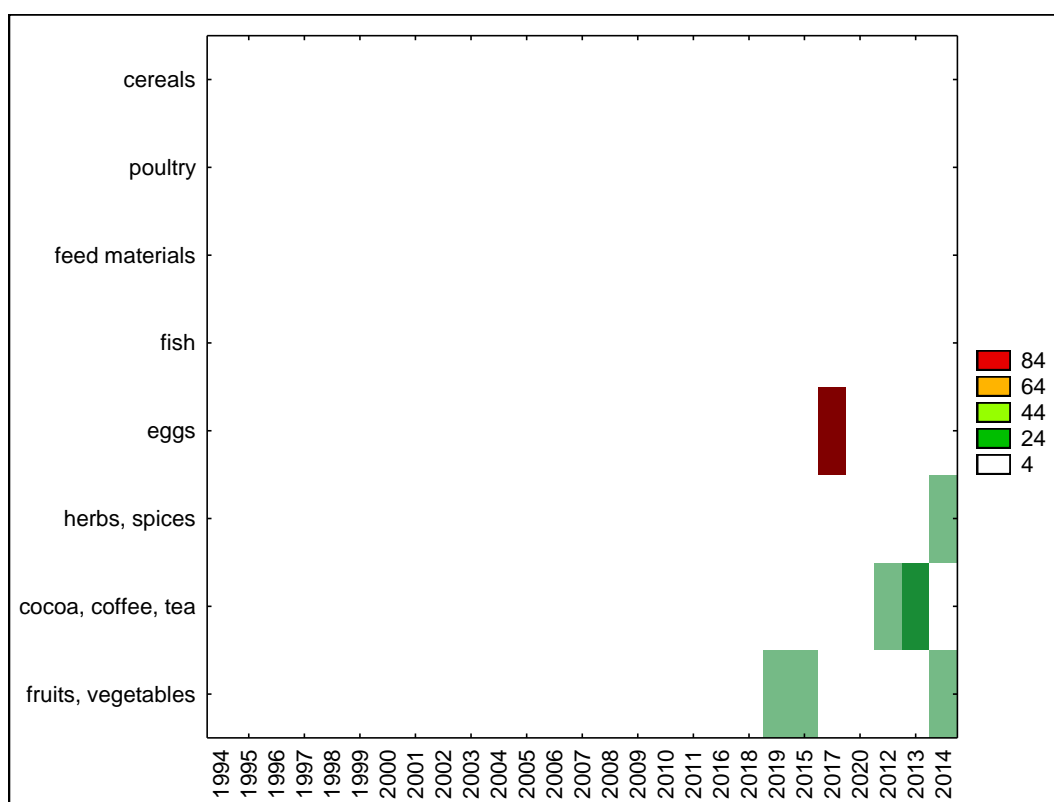

**Figure S10b.** Results of two-way joining cluster analysis for fipronil (product category)

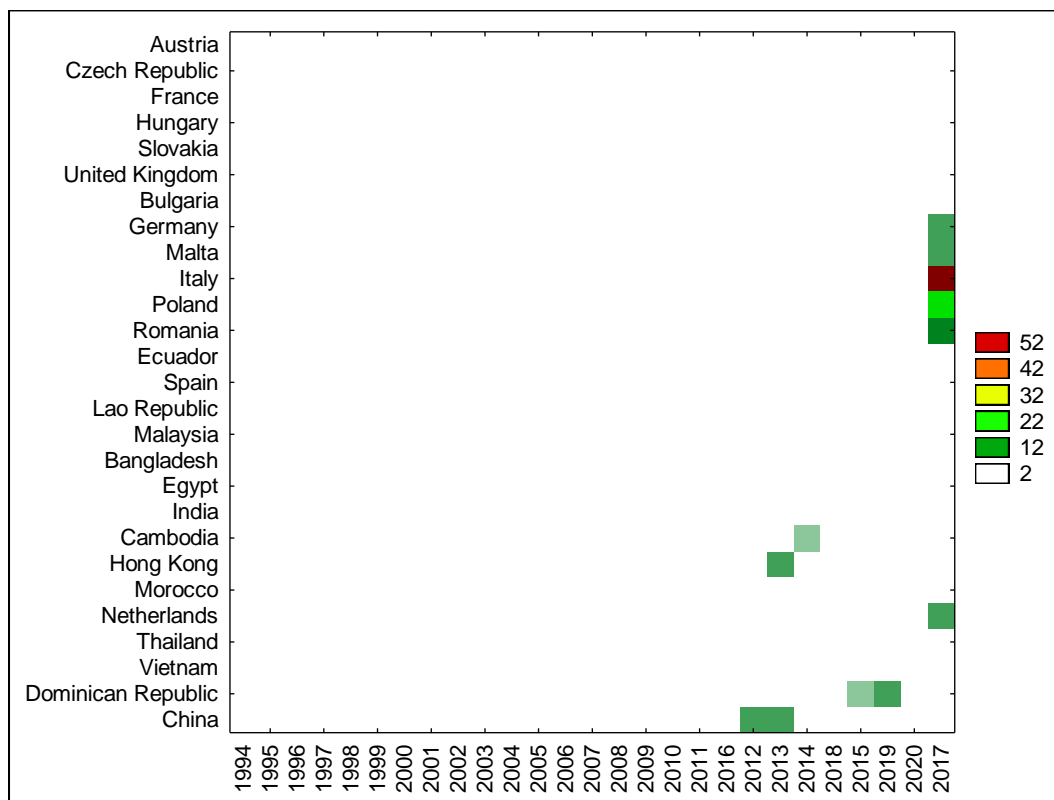

**Figure S10c.** Results of two-way joining cluster analysis for fipronil (origin country)

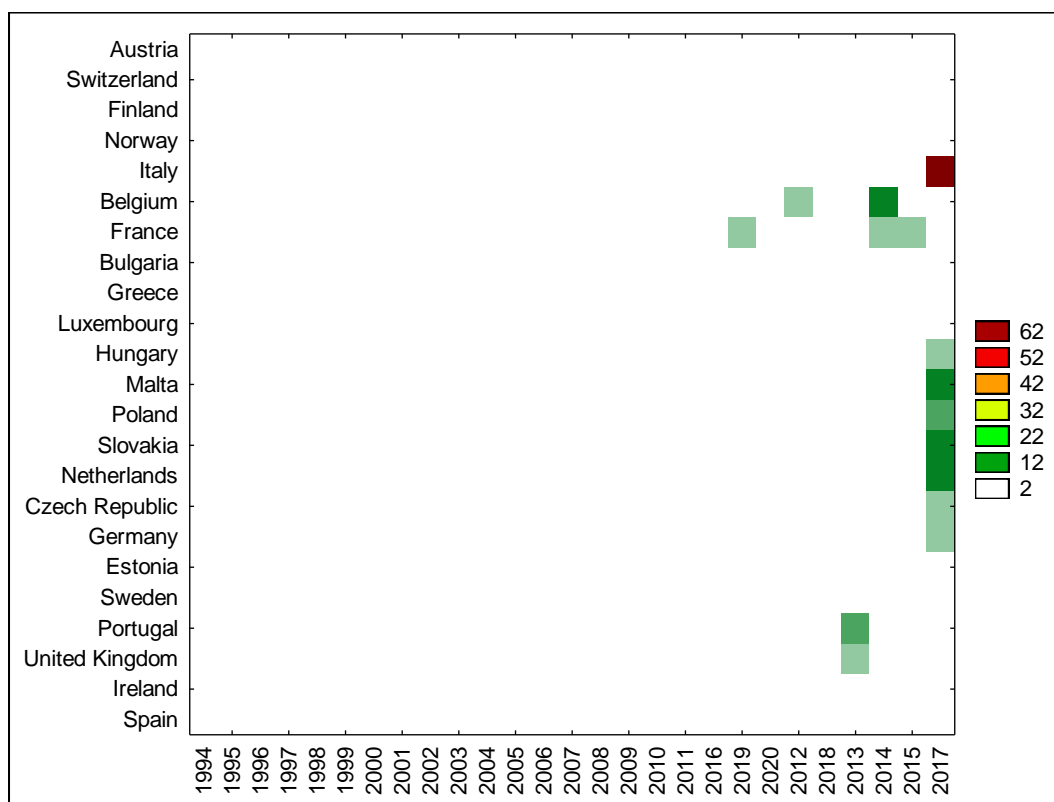

**Figure S10d.** Results of two-way joining cluster analysis for fipronil (notifying country)

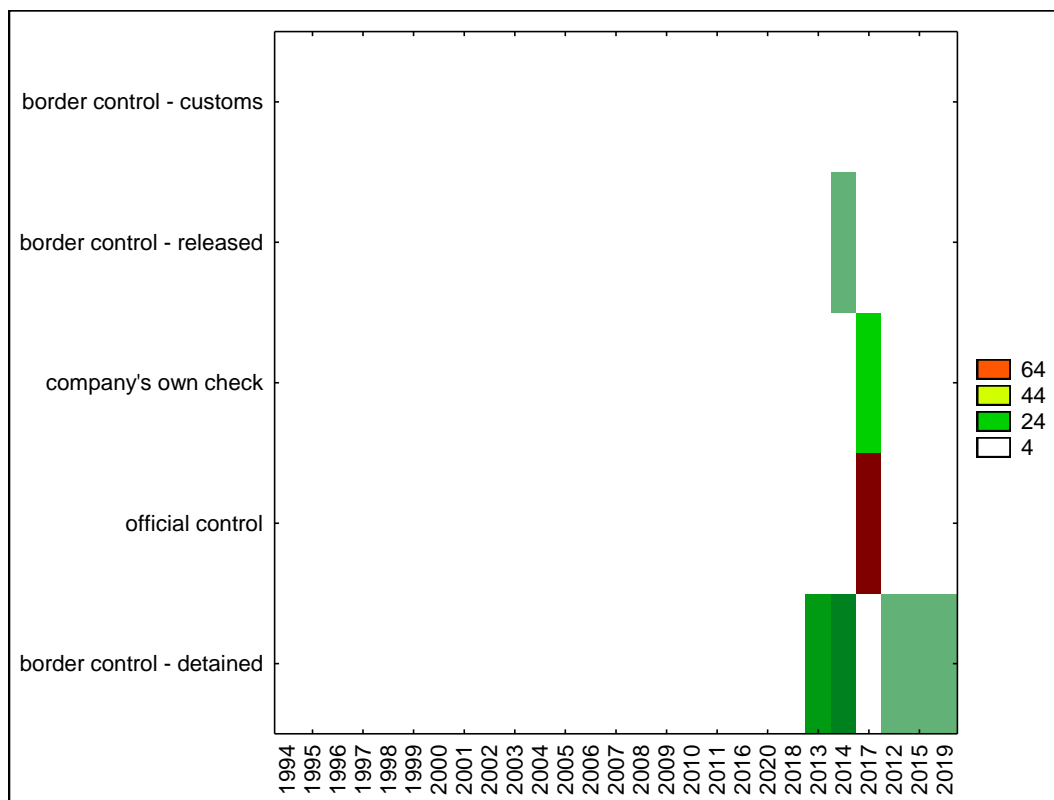

**Figure S10e.** Results of two-way joining cluster analysis for fipronil (notification basis)

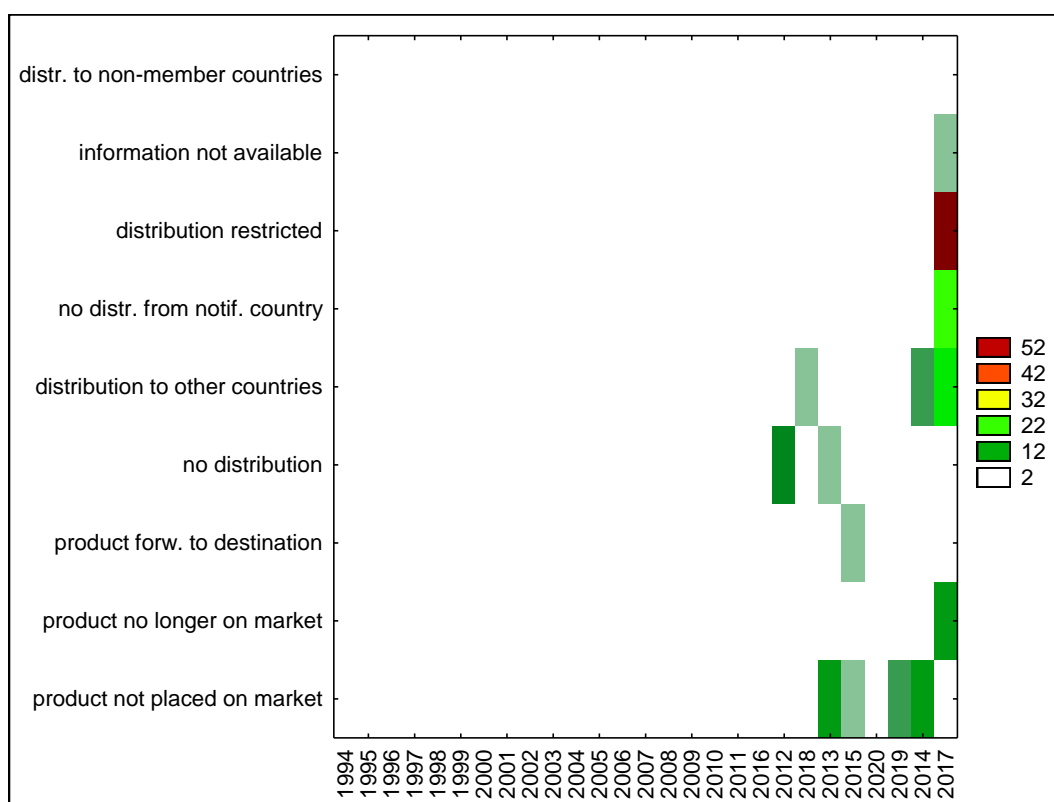

**Figure S10f.** Results of two-way joining cluster analysis for fipronil (distribution status)

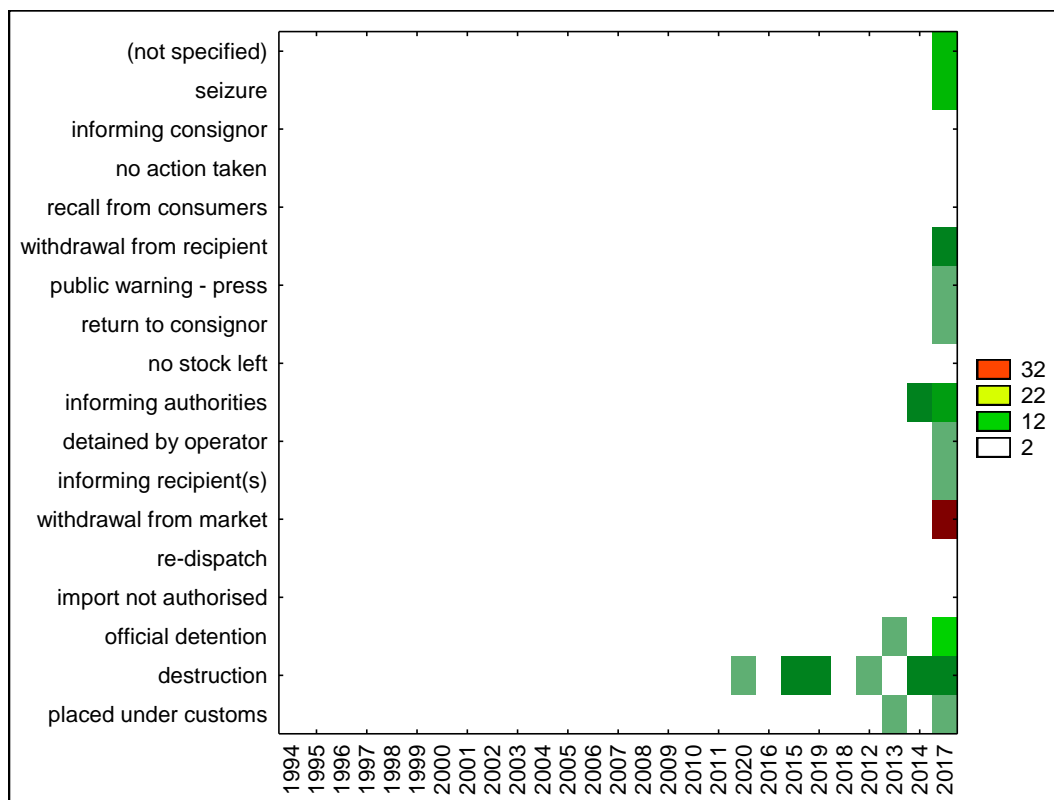

**Figure S10g.** Results of two-way joining cluster analysis for fipronil (action taken)

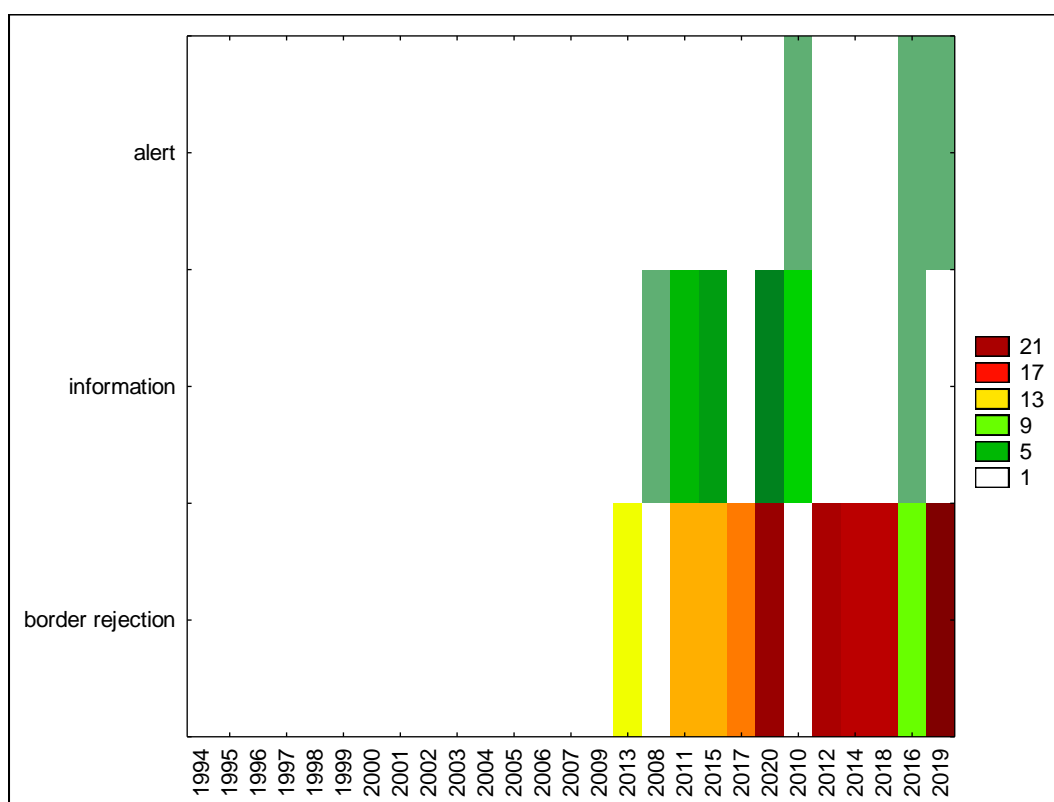

**Figure S11a.** Results of two-way joining cluster analysis for formetanate (notification type)



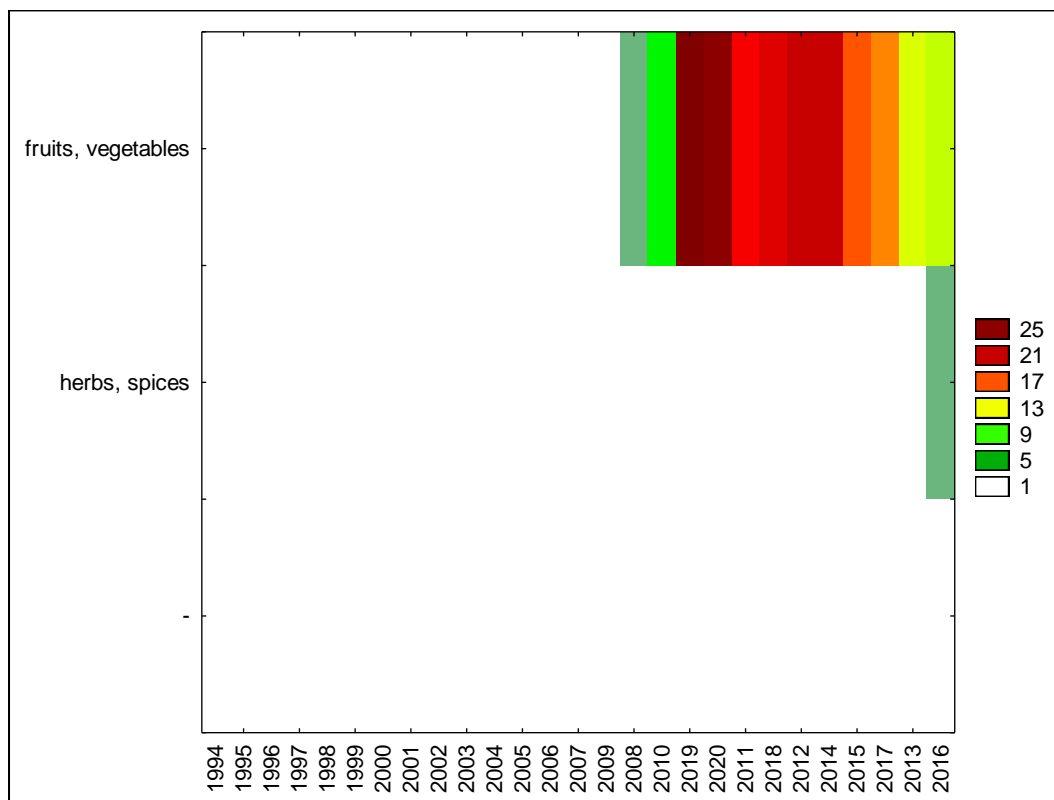

**Figure S11b.** Results of two-way joining cluster analysis for formetanate (product category)

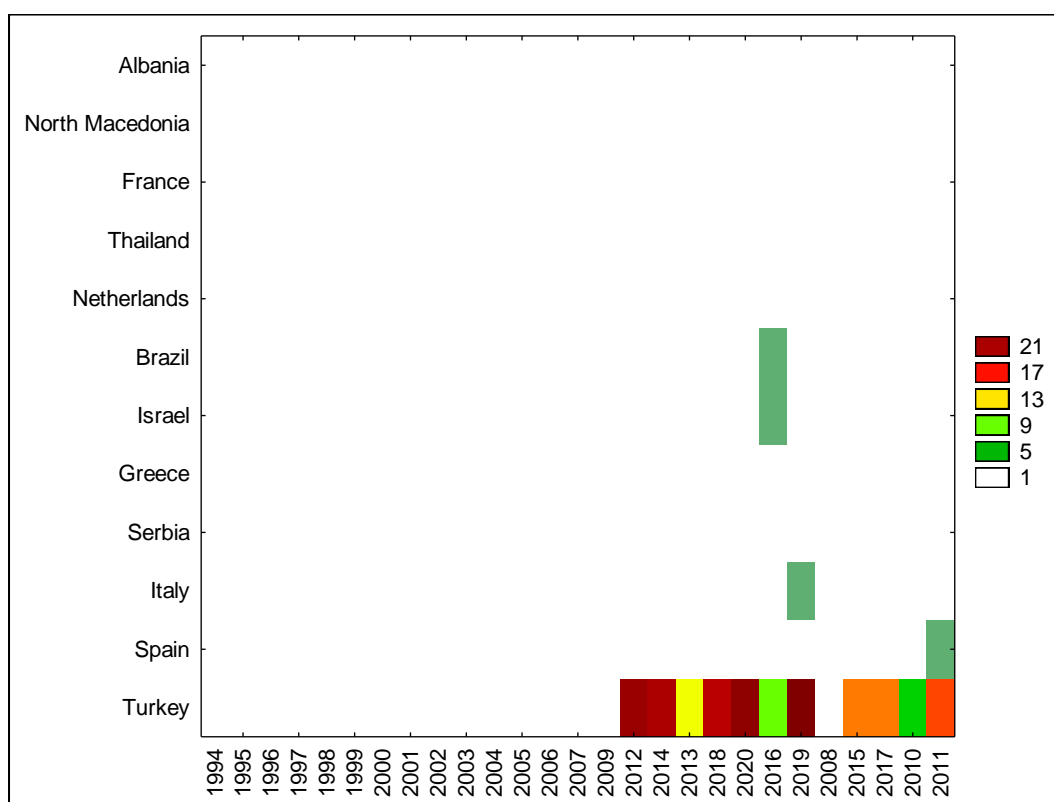

**Figure S11c.** Results of two-way joining cluster analysis for formetanate (origin country)

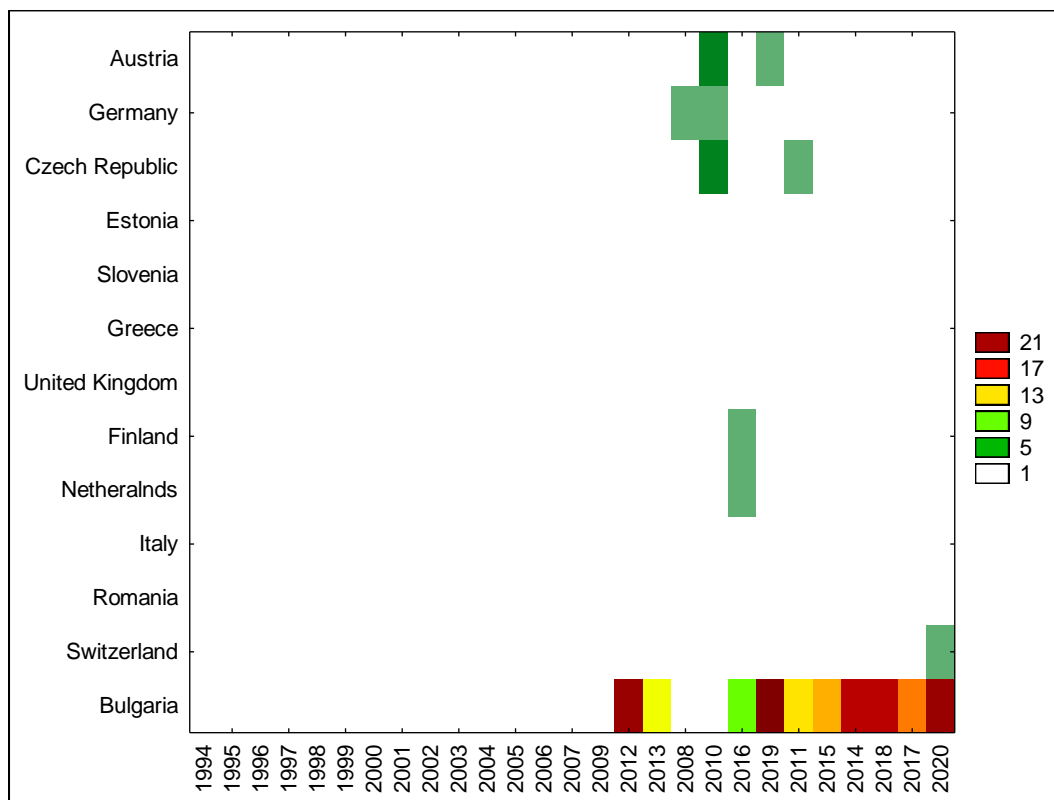

**Figure S11d.** Results of two-way joining cluster analysis for formetanate (notifying country)

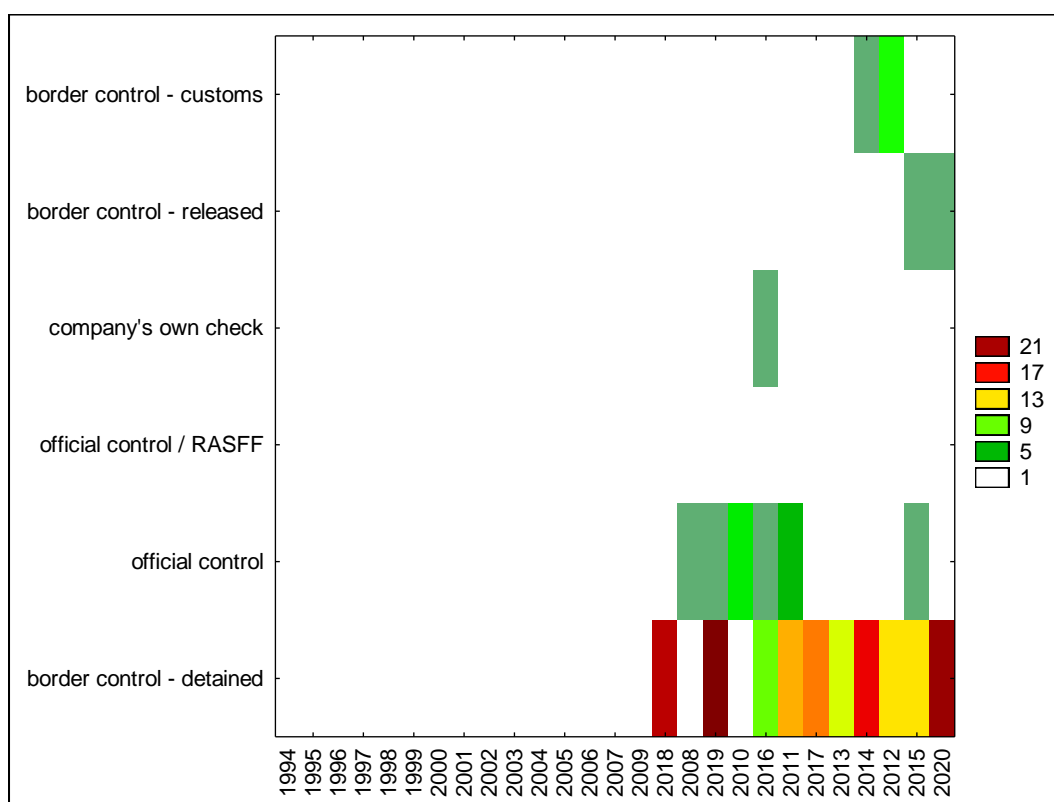

**Figure S11e.** Results of two-way joining cluster analysis for formetanate (notification basis)

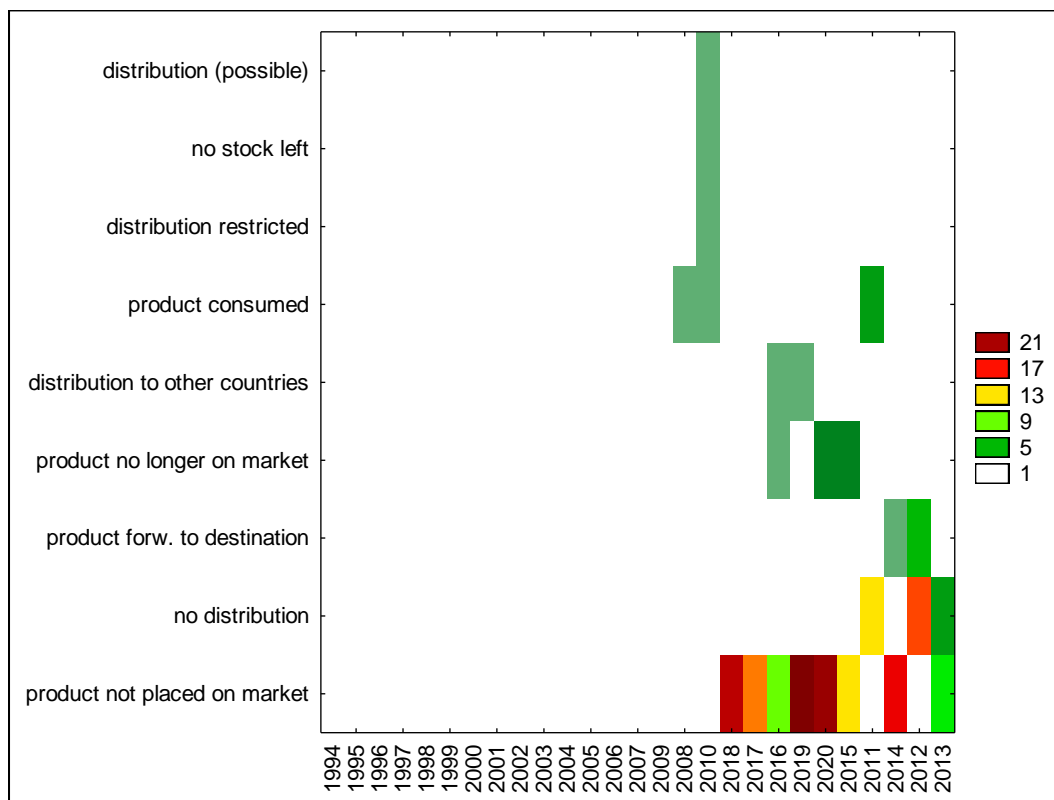

**Figure S11f.** Results of two-way joining cluster analysis for formetanate (distribution status)

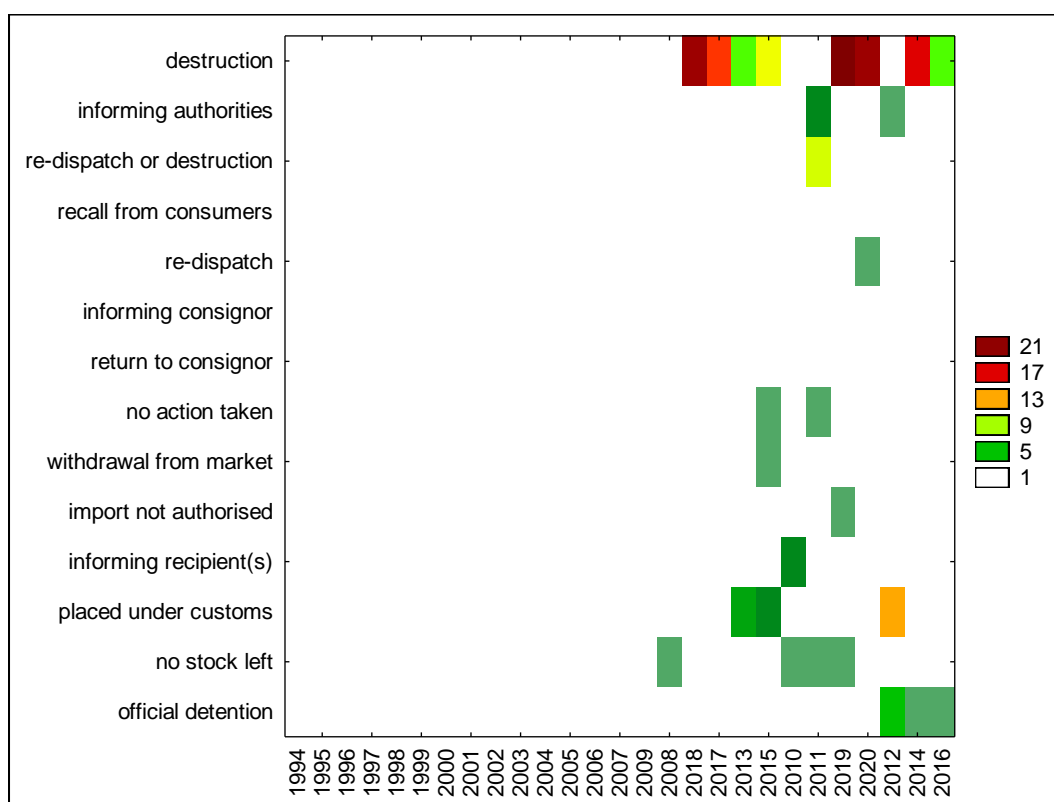

**Figure S11g.** Results of two-way joining cluster analysis for formetanate (action taken)

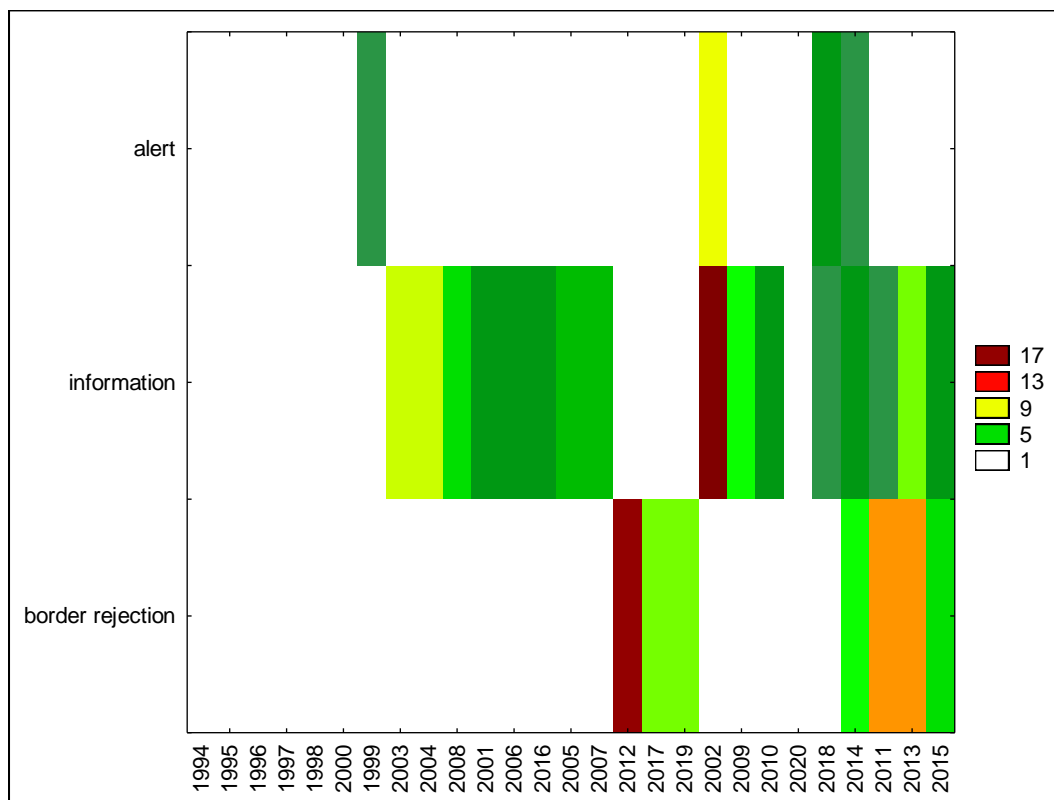

**Figure S12a.** Results of two-way joining cluster analysis for methamidophos (notification type)

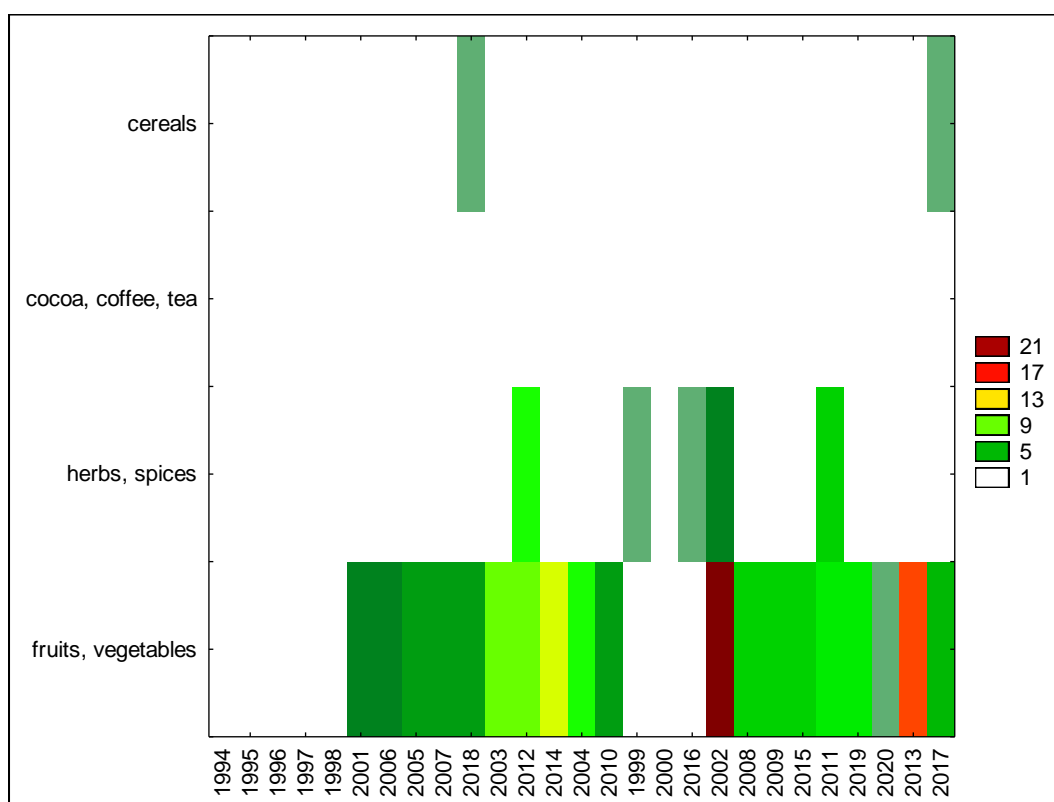

**Figure S12b.** Results of two-way joining cluster analysis for methamidophos (product category)

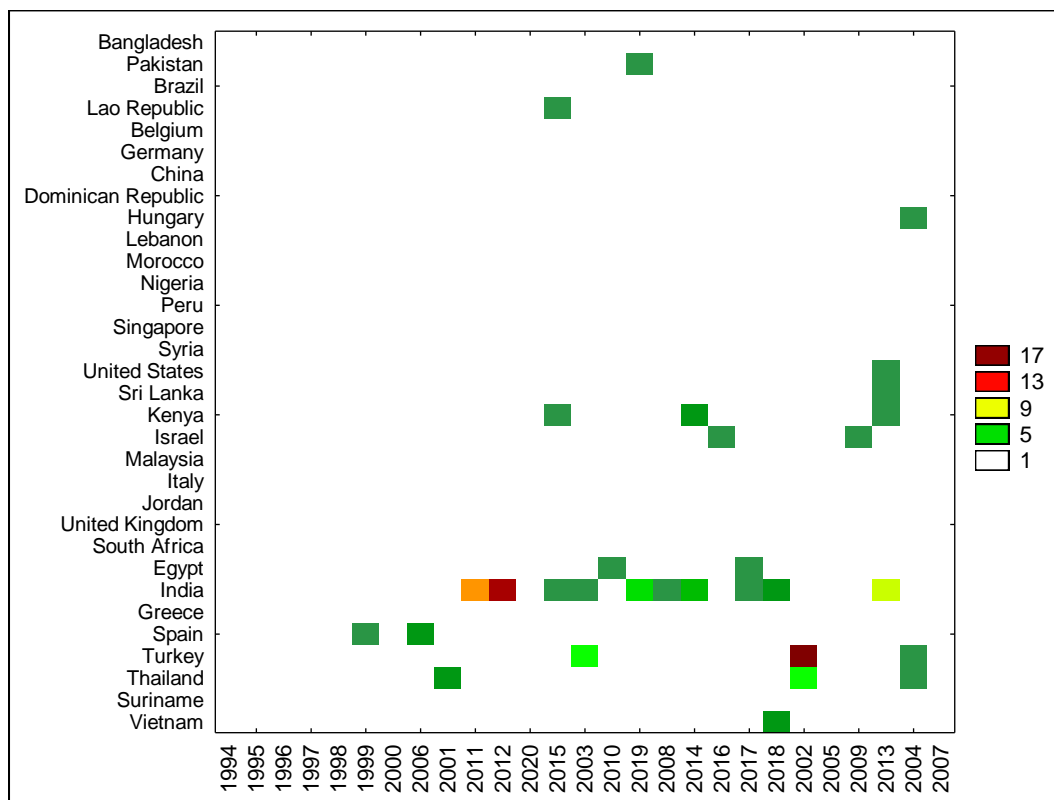

**Figure S12c.** Results of two-way joining cluster analysis for methamidophos (origin country)

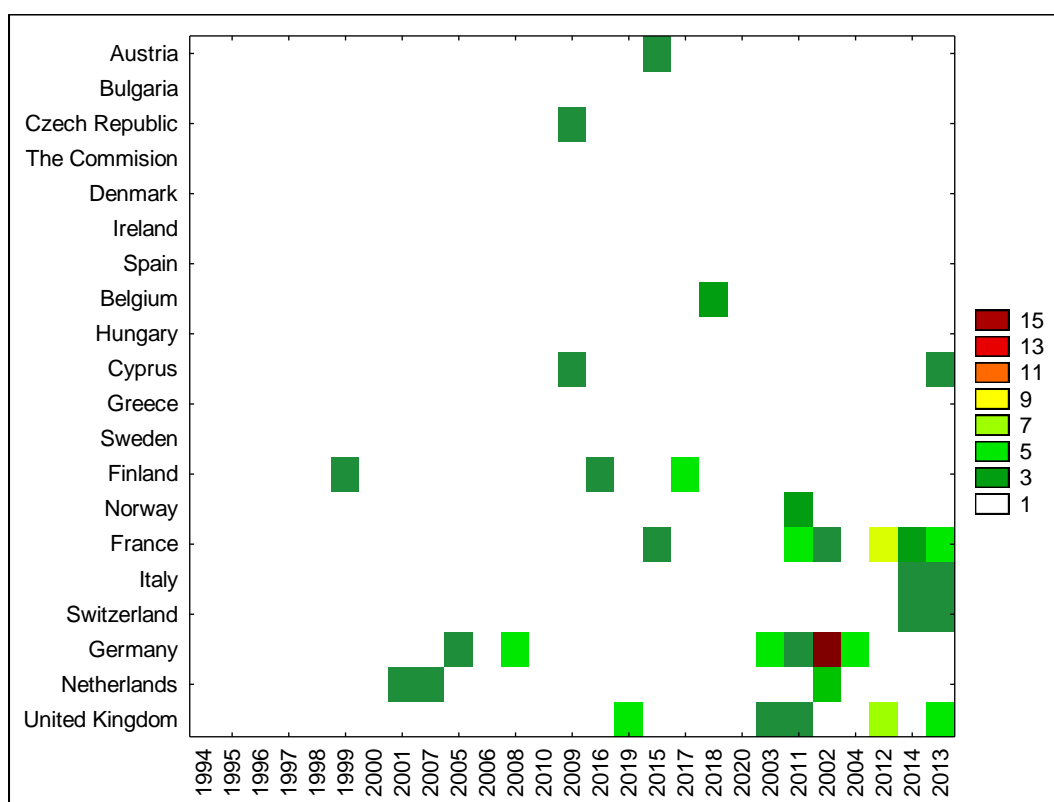

**Figure S12d.** Results of two-way joining cluster analysis for methamidophos (notifying country)

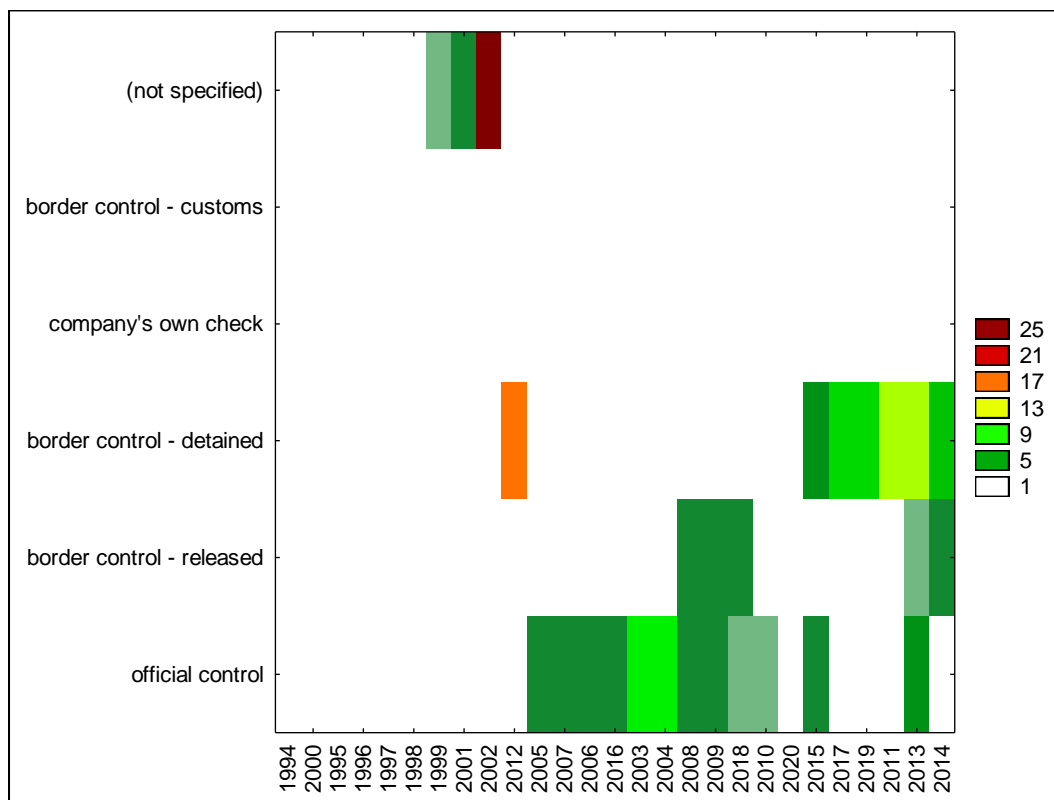

**Figure S12e.** Results of two-way joining cluster analysis for methamidophos (notification basis)

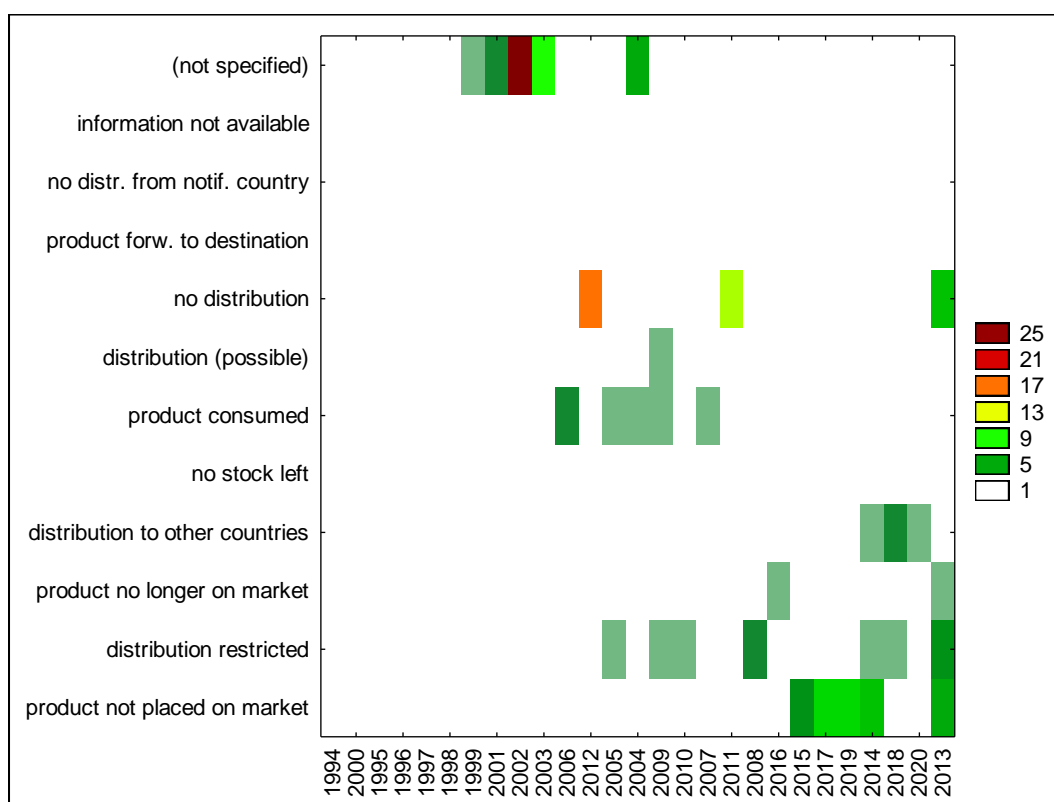

**Figure S12f.** Results of two-way joining cluster analysis for methamidophos (distribution status)

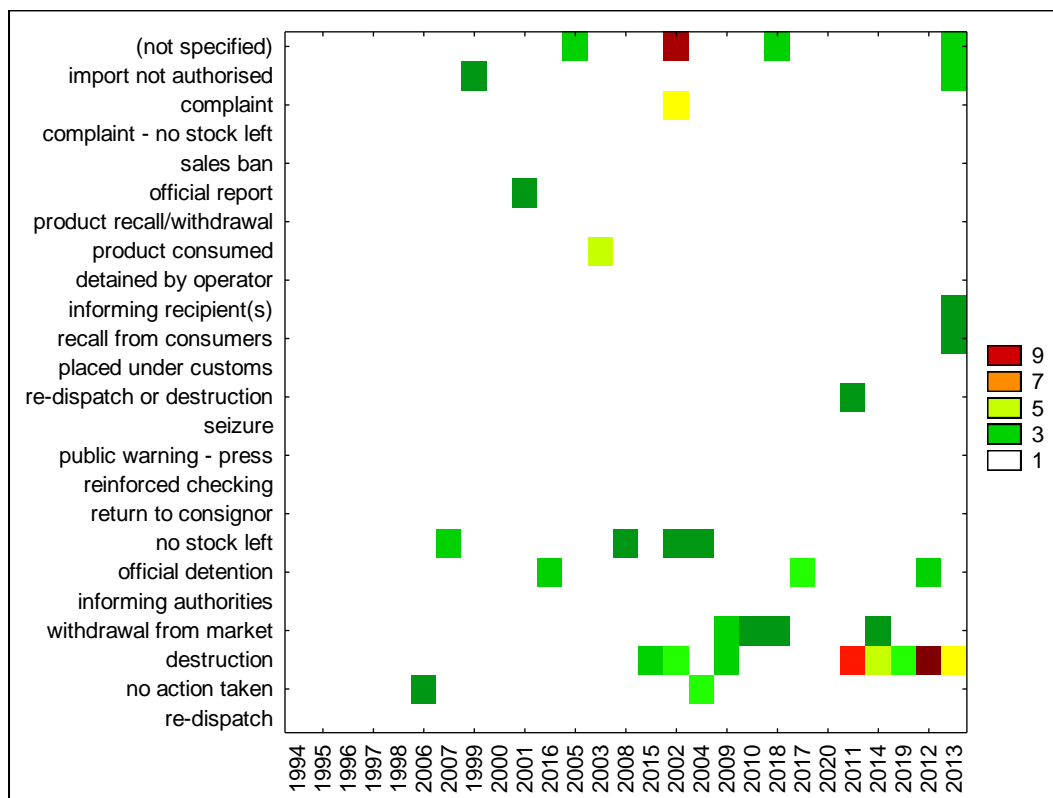

**Figure S12g.** Results of two-way joining cluster analysis for methamidophos (action taken)

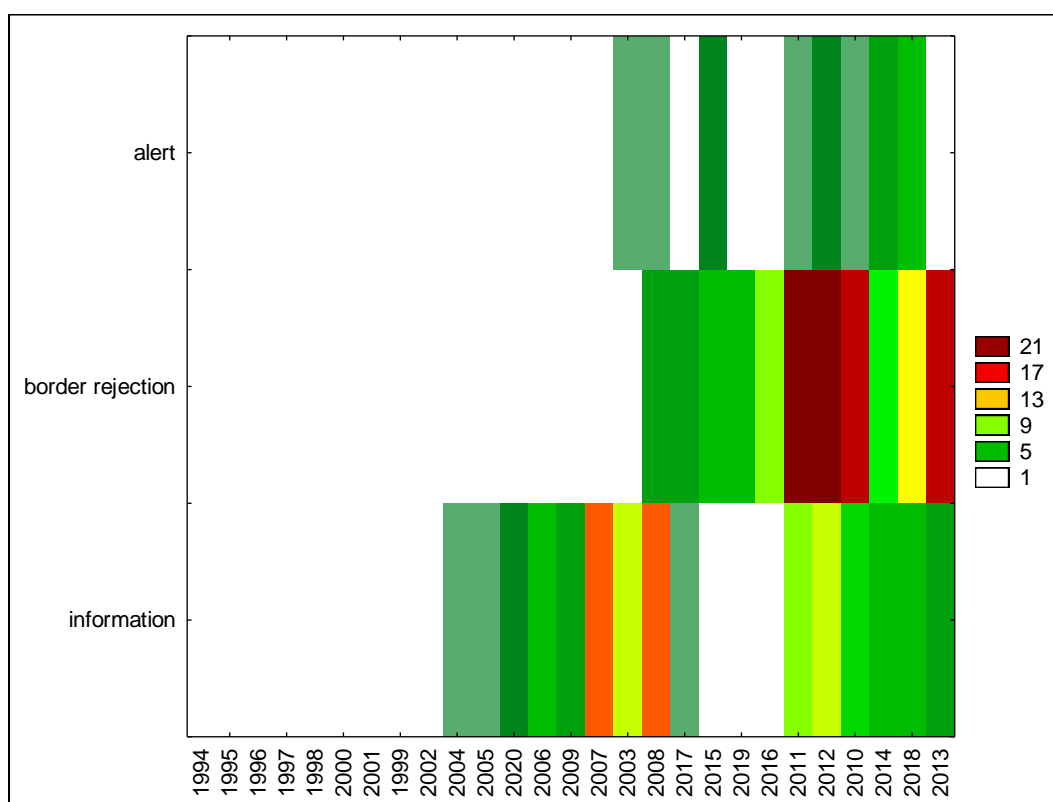

**Figure S13a.** Results of two-way joining cluster analysis for methomyl (notification type)

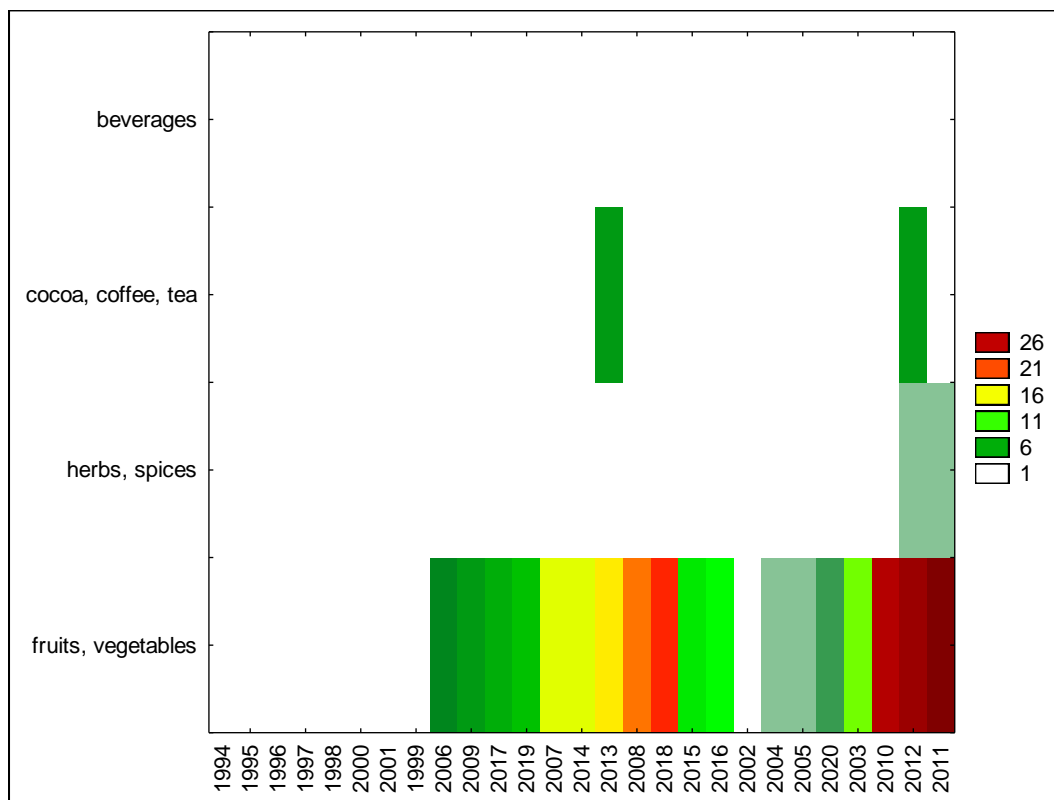

**Figure S13b.** Results of two-way joining cluster analysis for methomyl (product category)

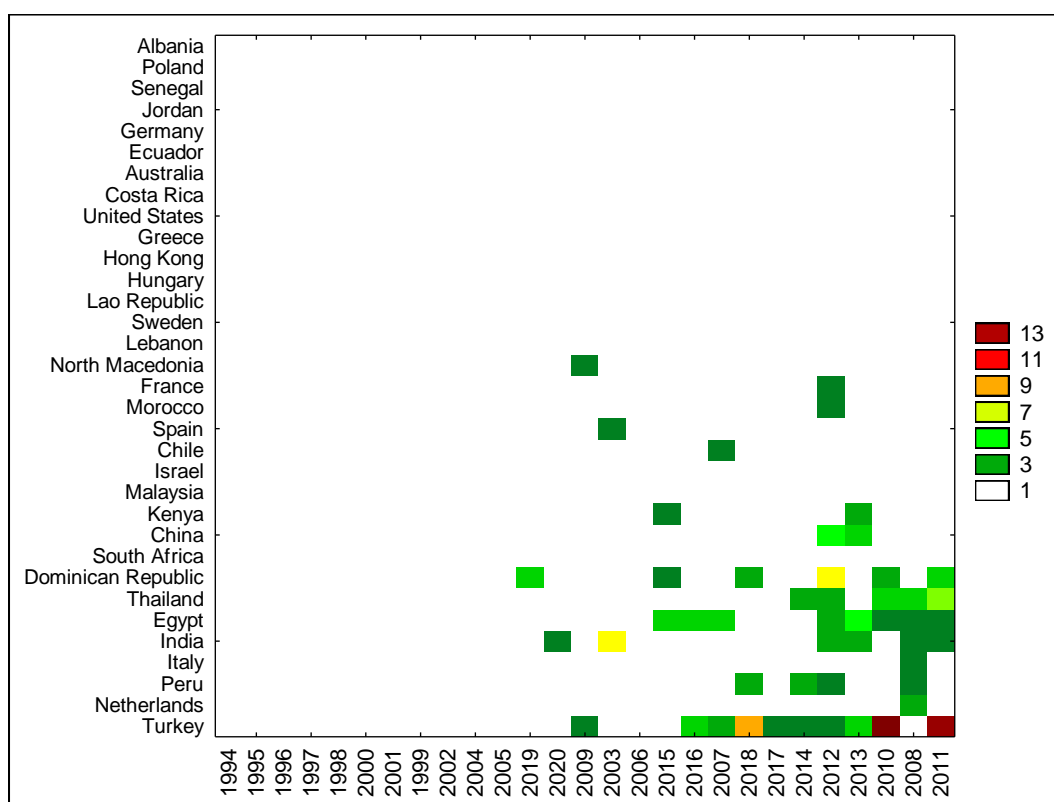

**Figure S13c.** Results of two-way joining cluster analysis for methomyl (origin country)



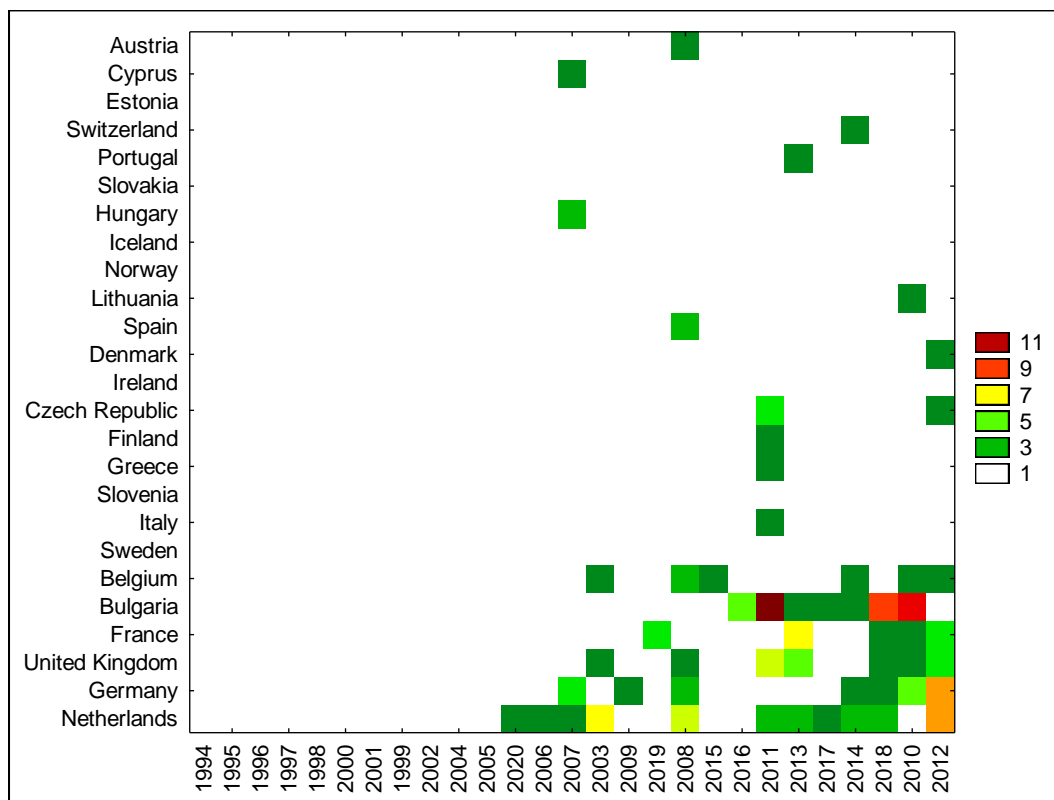

**Figure S13d.** Results of two-way joining cluster analysis for methomyl (notifying country)

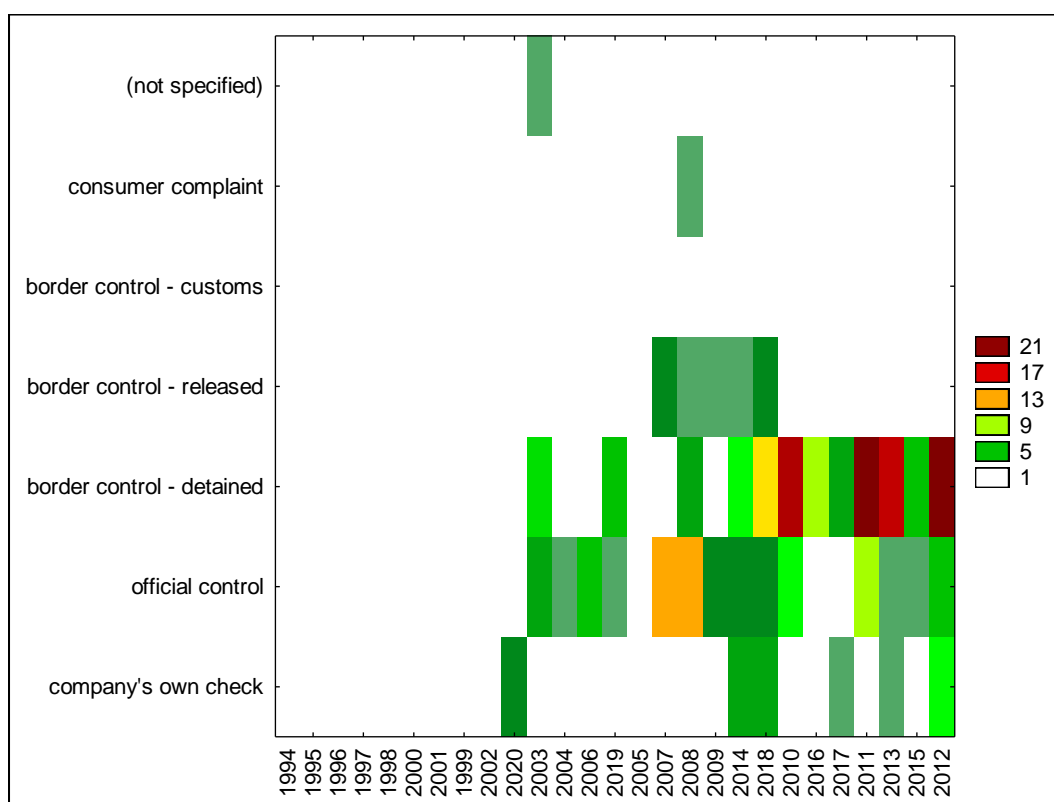

**Figure S13e.** Results of two-way joining cluster analysis for methomyl (notification basis)

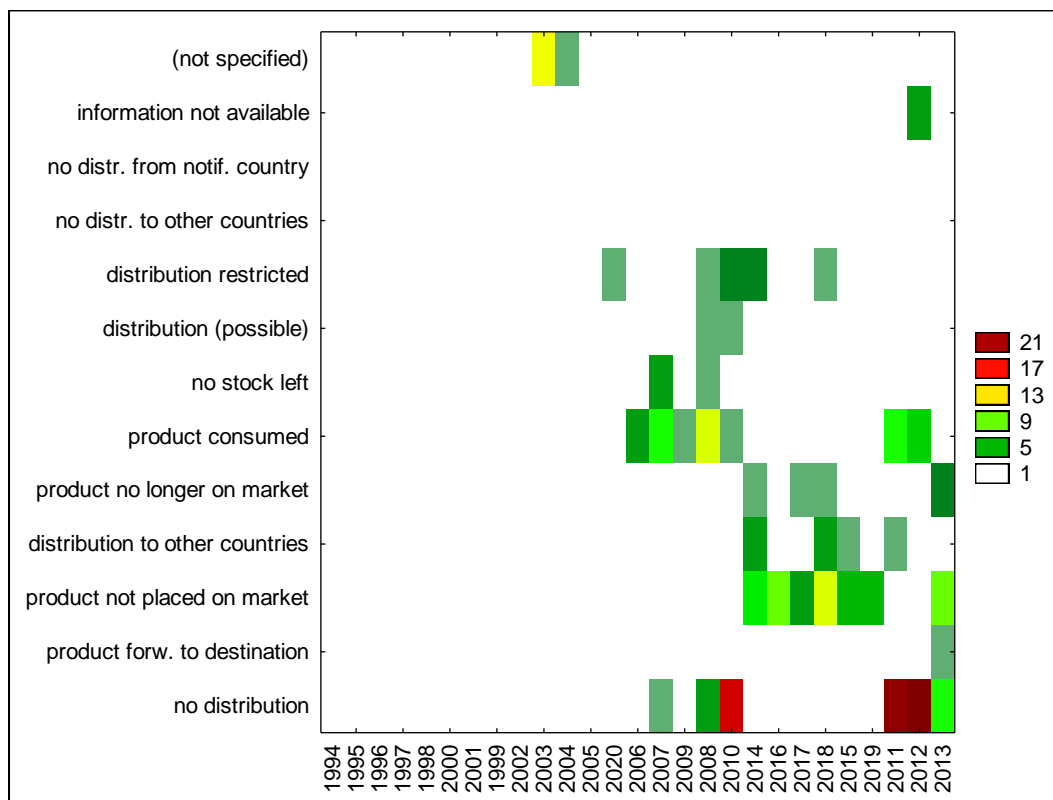

**Figure S13f.** Results of two-way joining cluster analysis for methomyl (distribution status)

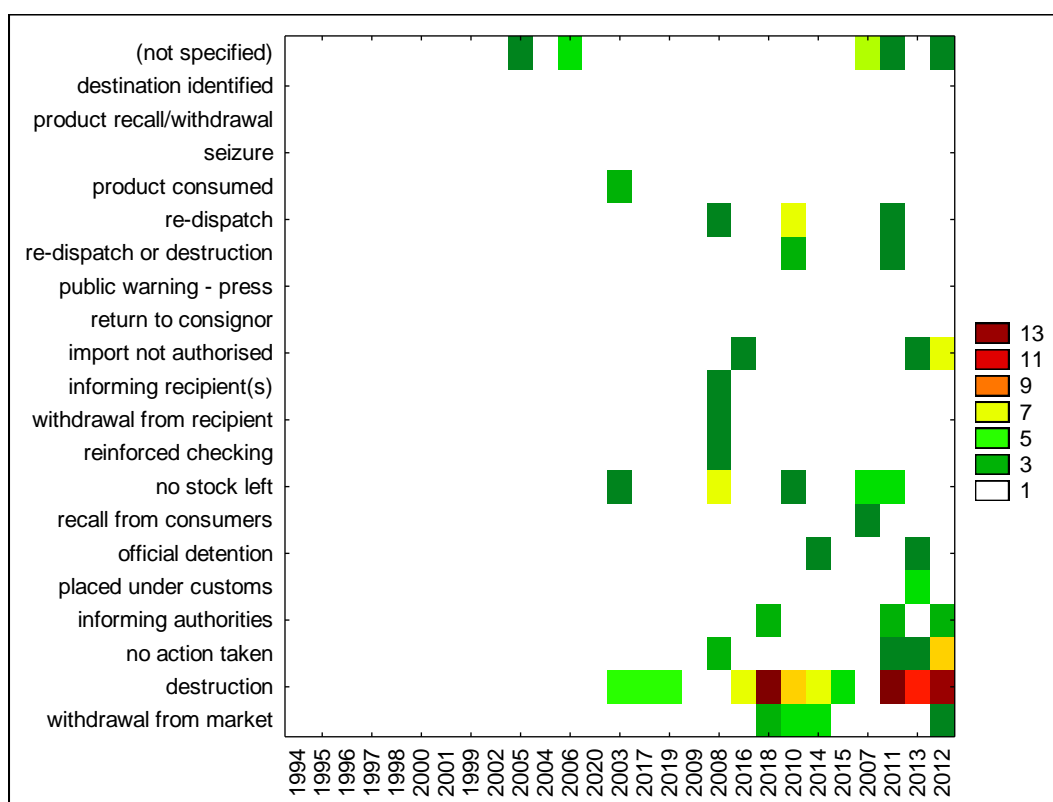

**Figure S13g.** Results of two-way joining cluster analysis for methomyl (action taken)

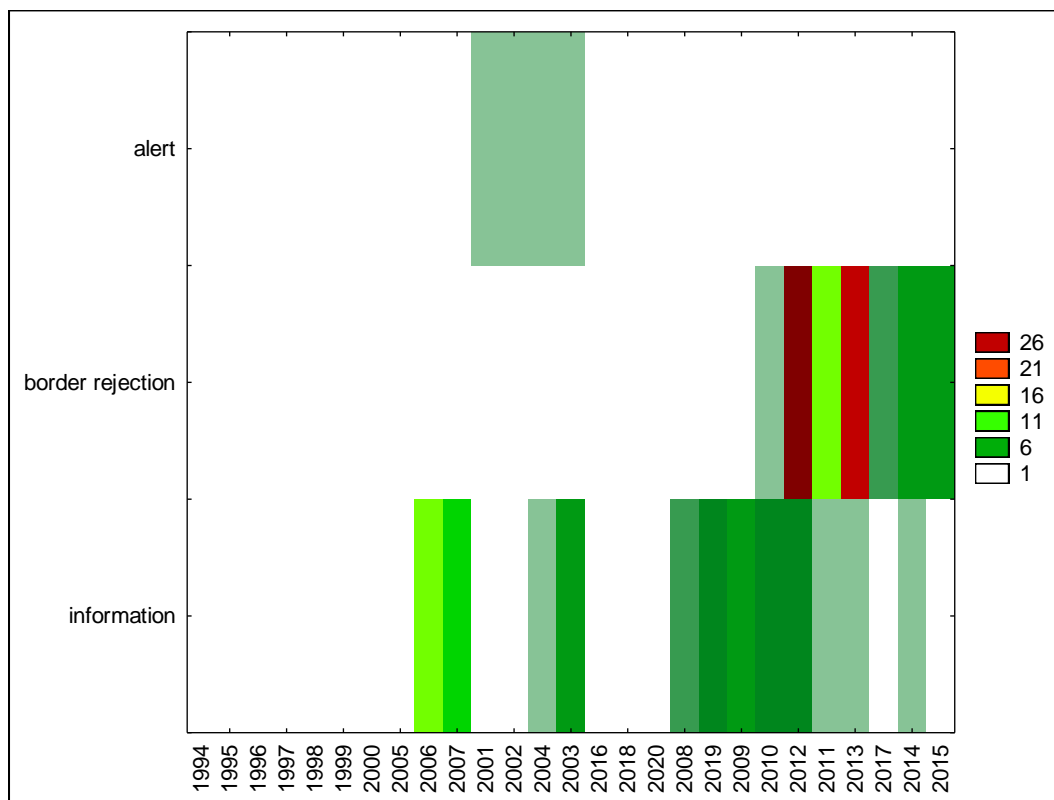

**Figure S14a.** Results of two-way joining cluster analysis for monocotophos (notification type)

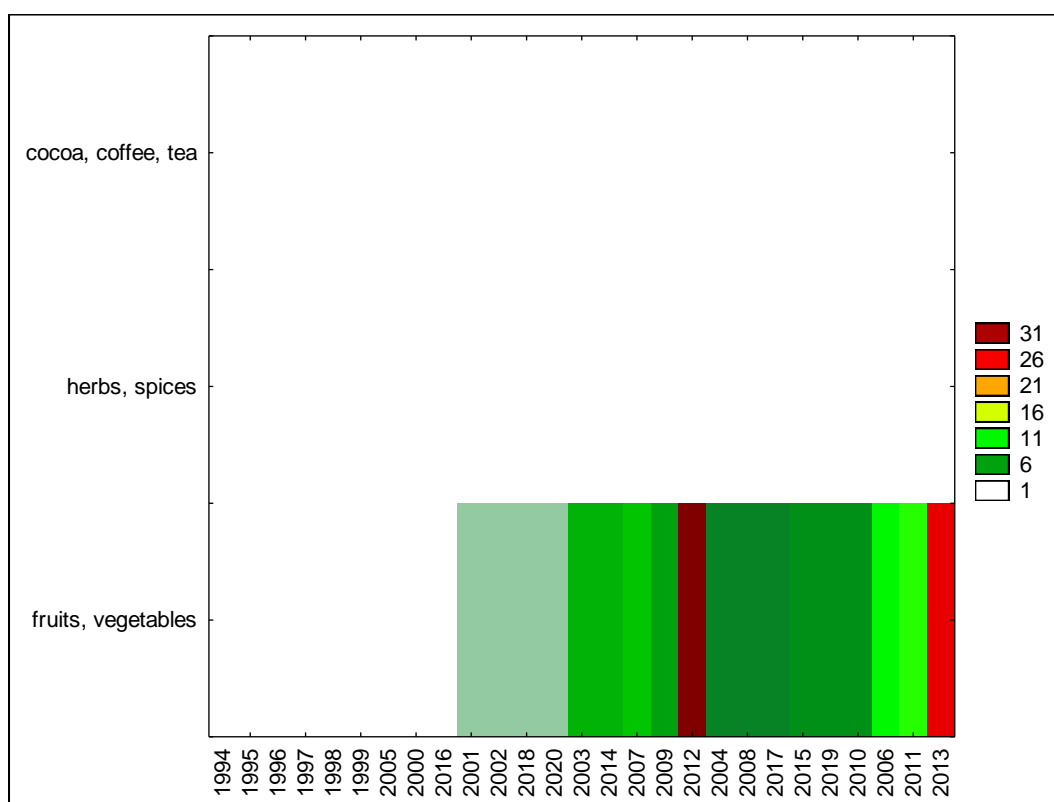

**Figure S14b.** Results of two-way joining cluster analysis for monocotophos (product category)

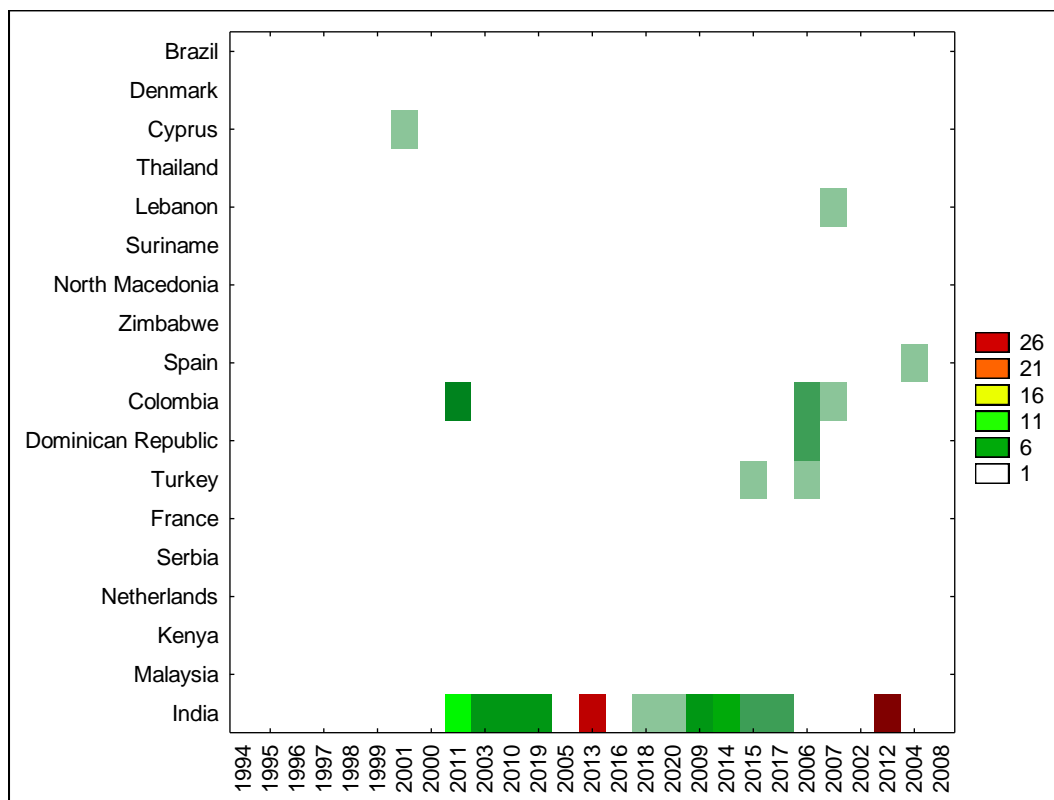

**Figure S14c.** Results of two-way joining cluster analysis for monocrotophos (origin country)

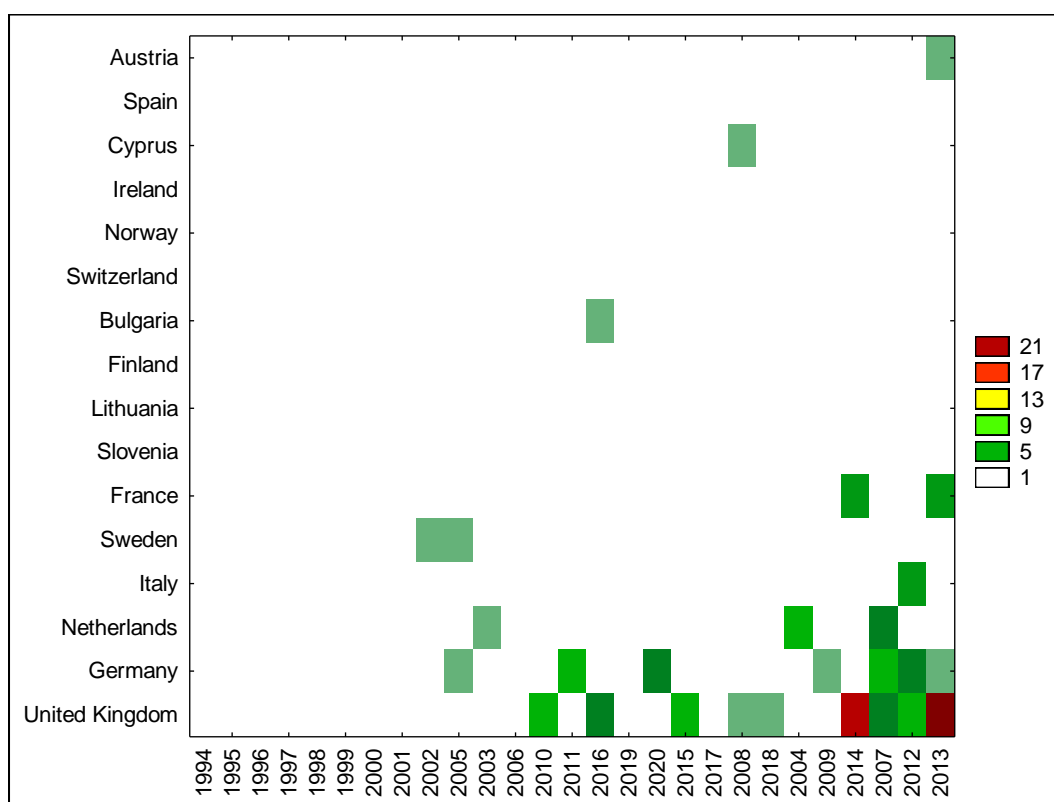

**Figure S14d.** Results of two-way joining cluster analysis for monocrotophos (notifying country)

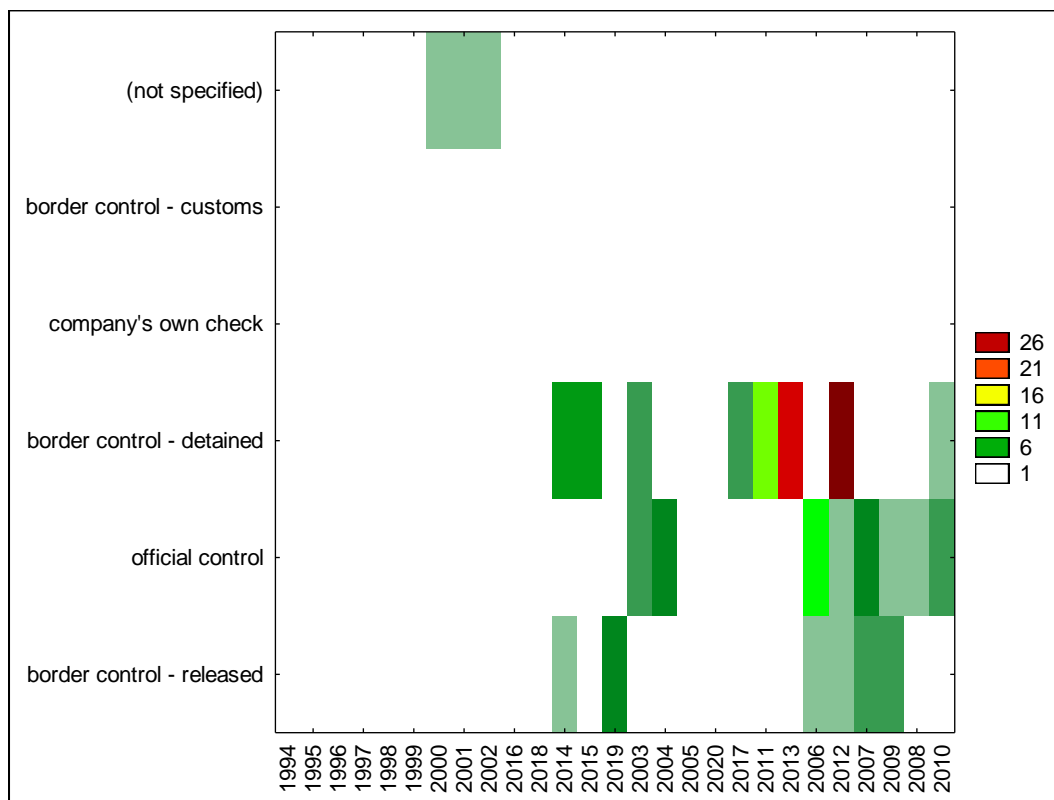

**Figure S14e.** Results of two-way joining cluster analysis for monocrotophos (notification basis)

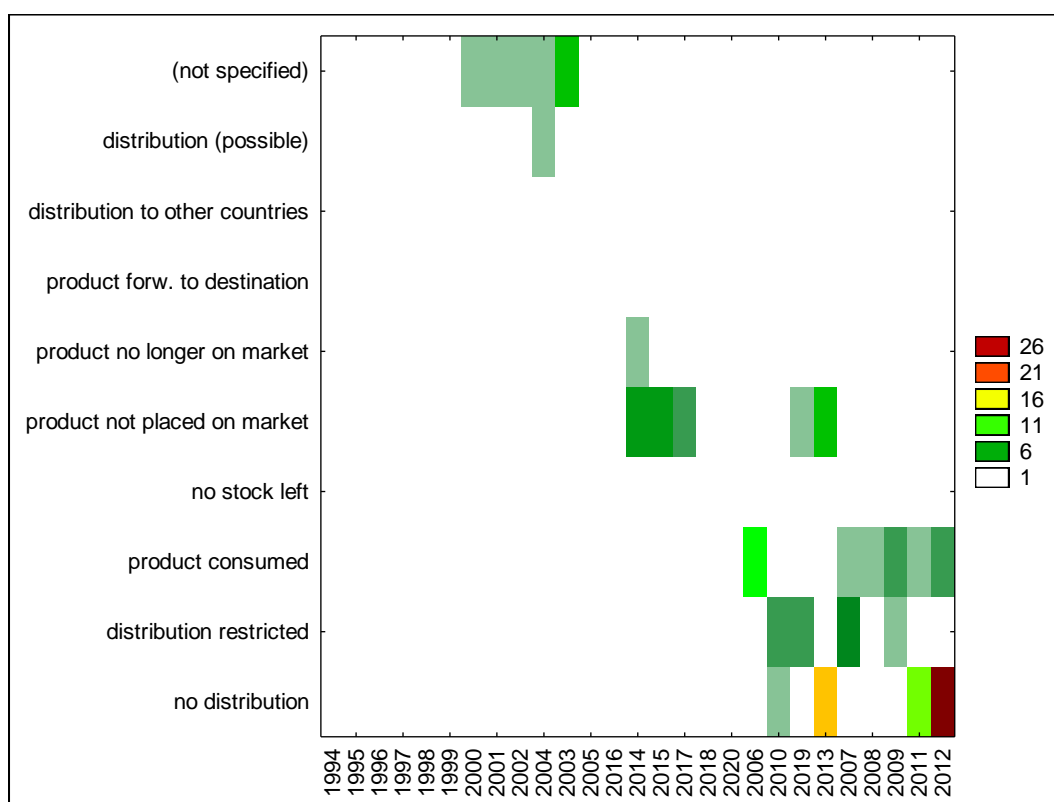

**Figure S14f.** Results of two-way joining cluster analysis for monocrotophos (distribution status)

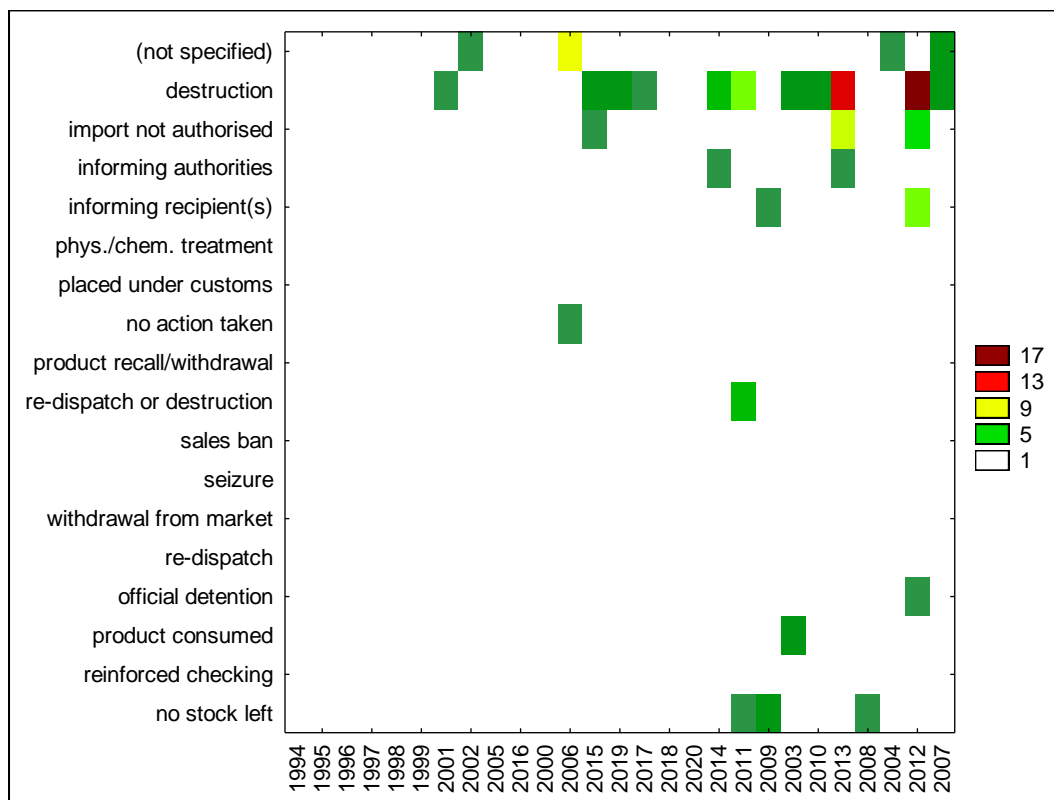

**Figure S14g.** Results of two-way joining cluster analysis for monocrotophos (action taken)

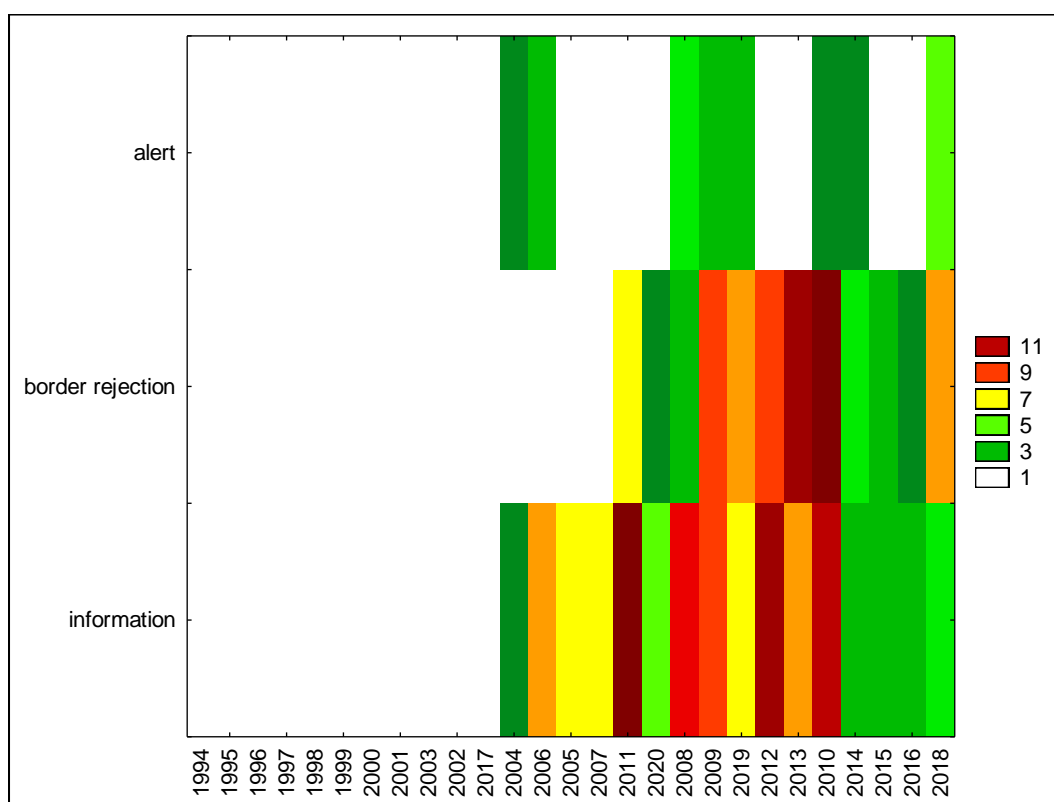

**Figure S15a.** Results of two-way joining cluster analysis for omethoate (notification type)

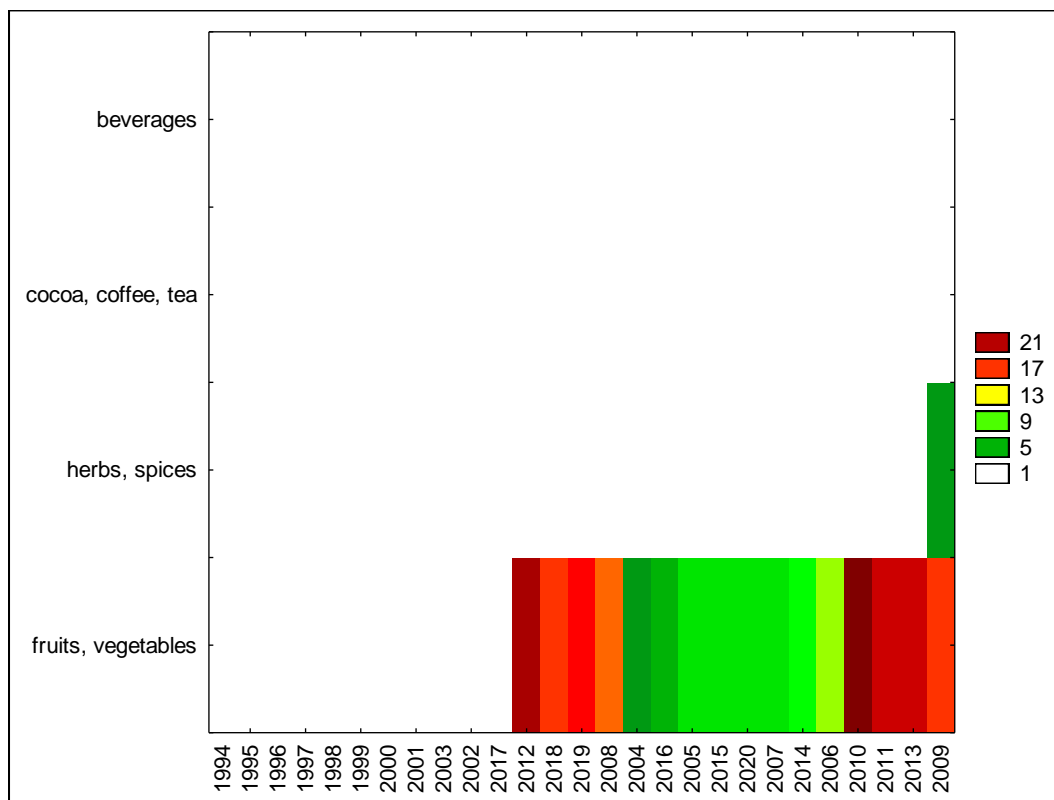

**Figure S15b.** Results of two-way joining cluster analysis for omethoate (product category)

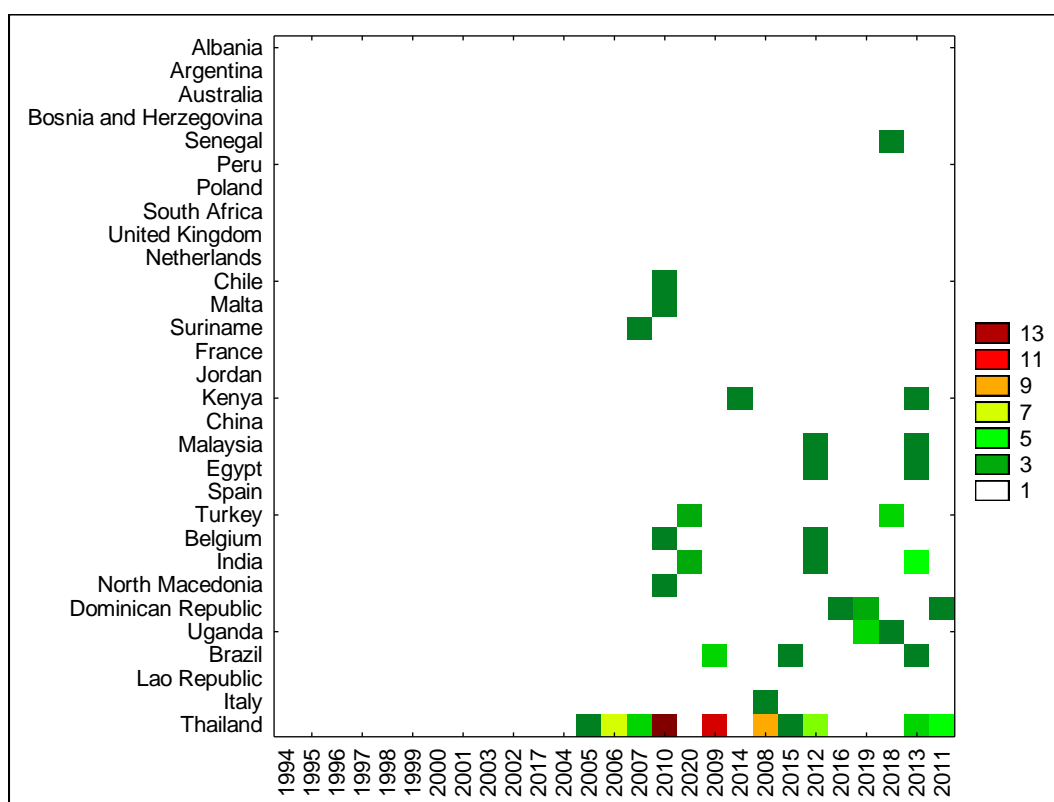

**Figure S15c.** Results of two-way joining cluster analysis for omethoate (origin country)

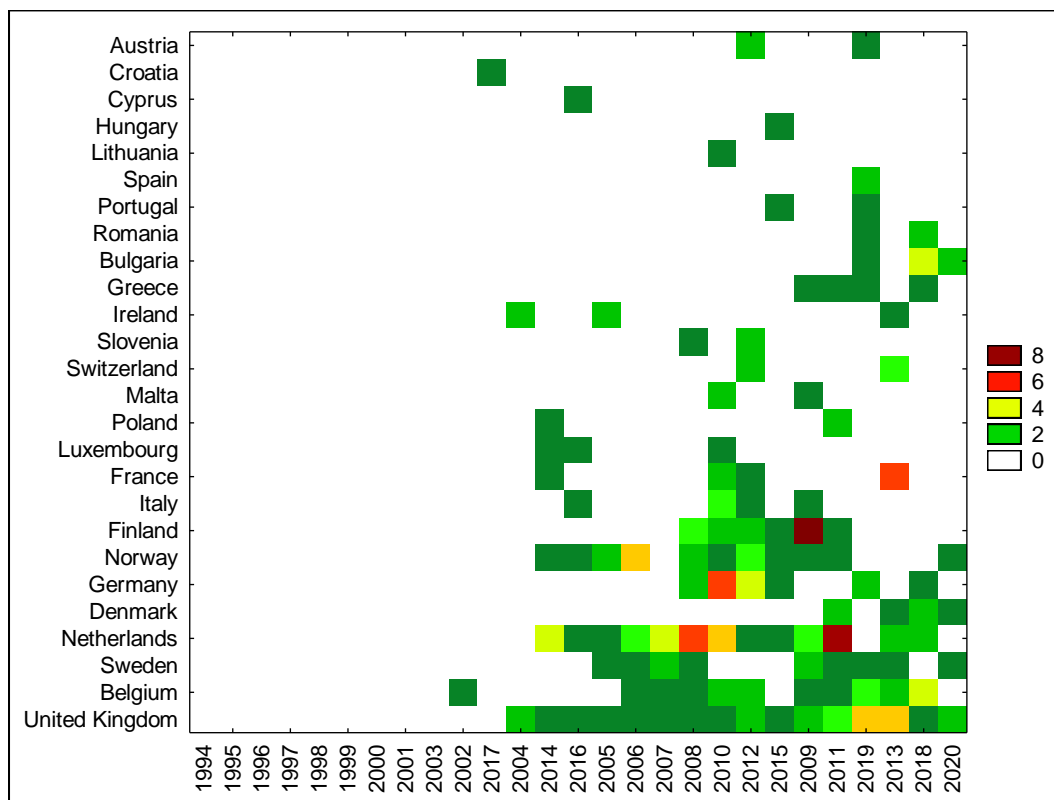

**Figure S15d.** Results of two-way joining cluster analysis for omethoate (notifying country)

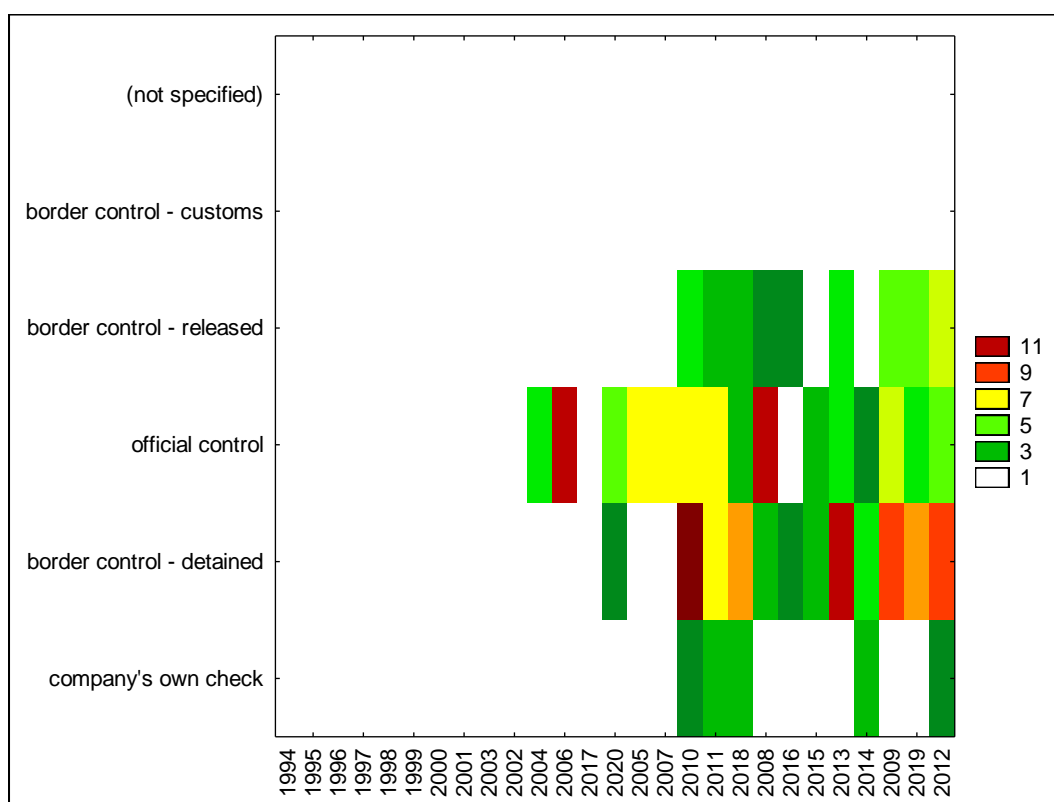

**Figure S15e.** Results of two-way joining cluster analysis for omethoate (notification basis)



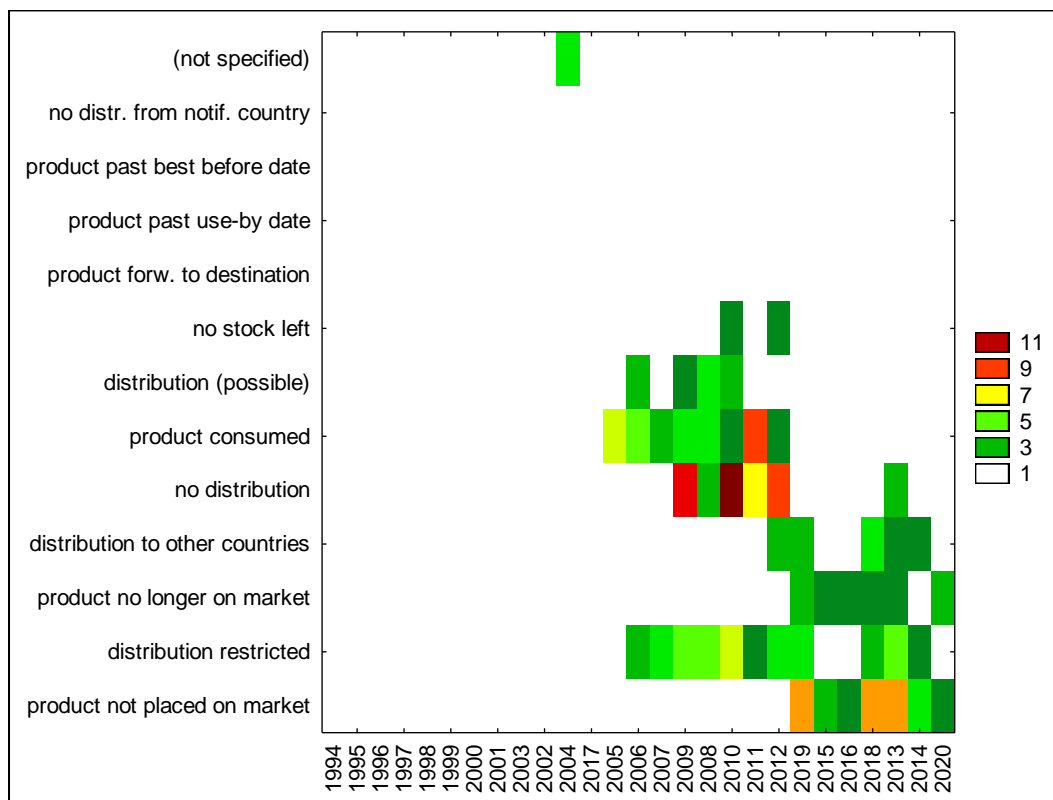

**Figure S15f.** Results of two-way joining cluster analysis for omethoate (distribution status)

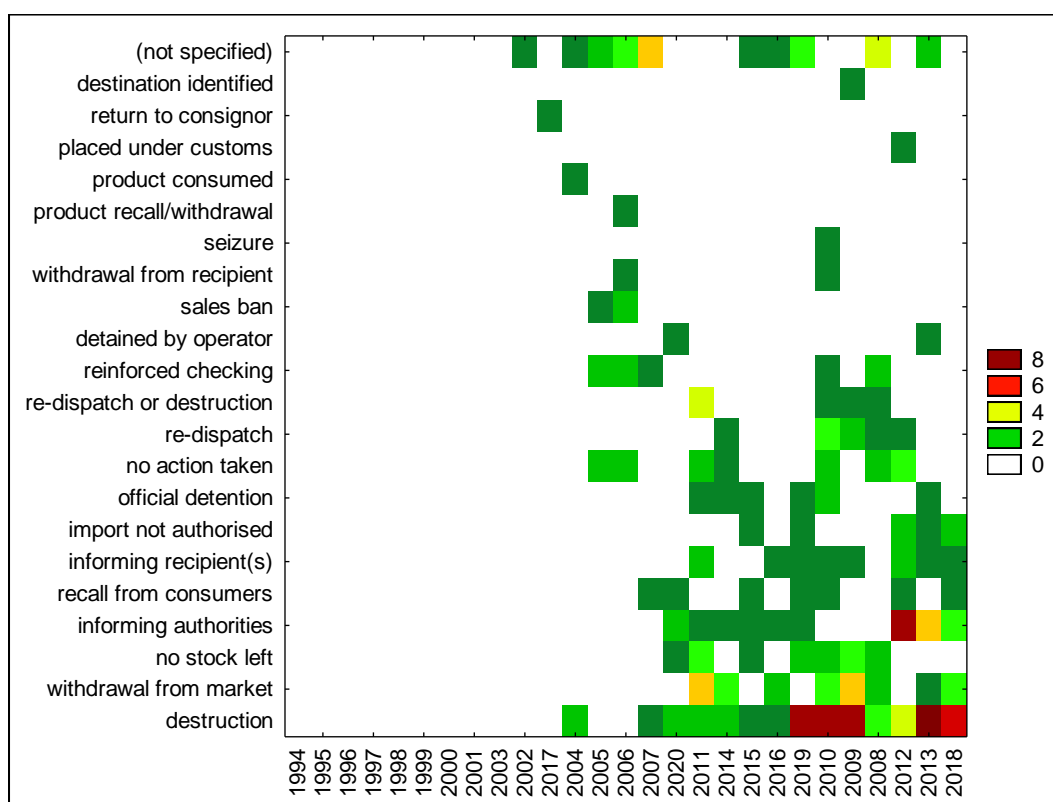

**Figure S15g.** Results of two-way joining cluster analysis for omethoate (action taken)

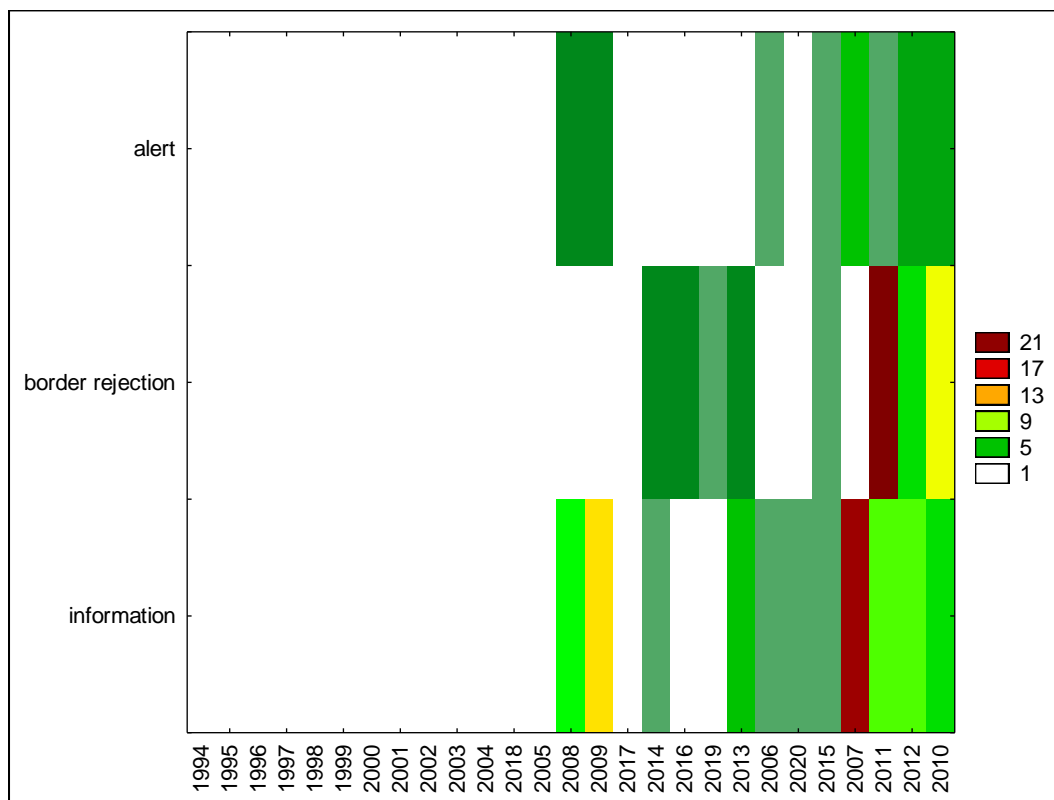

**Figure S16a.** Results of two-way joining cluster analysis for oxamyl (notification type)

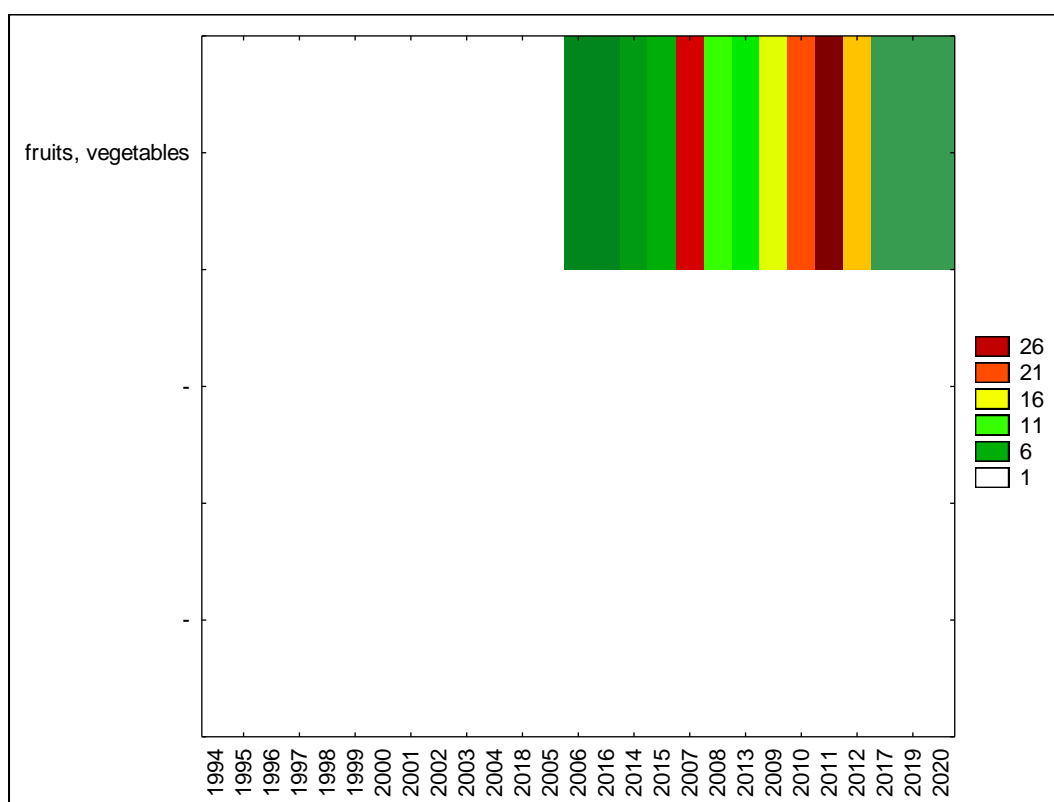

**Figure S16b.** Results of two-way joining cluster analysis for oxamyl (product category)

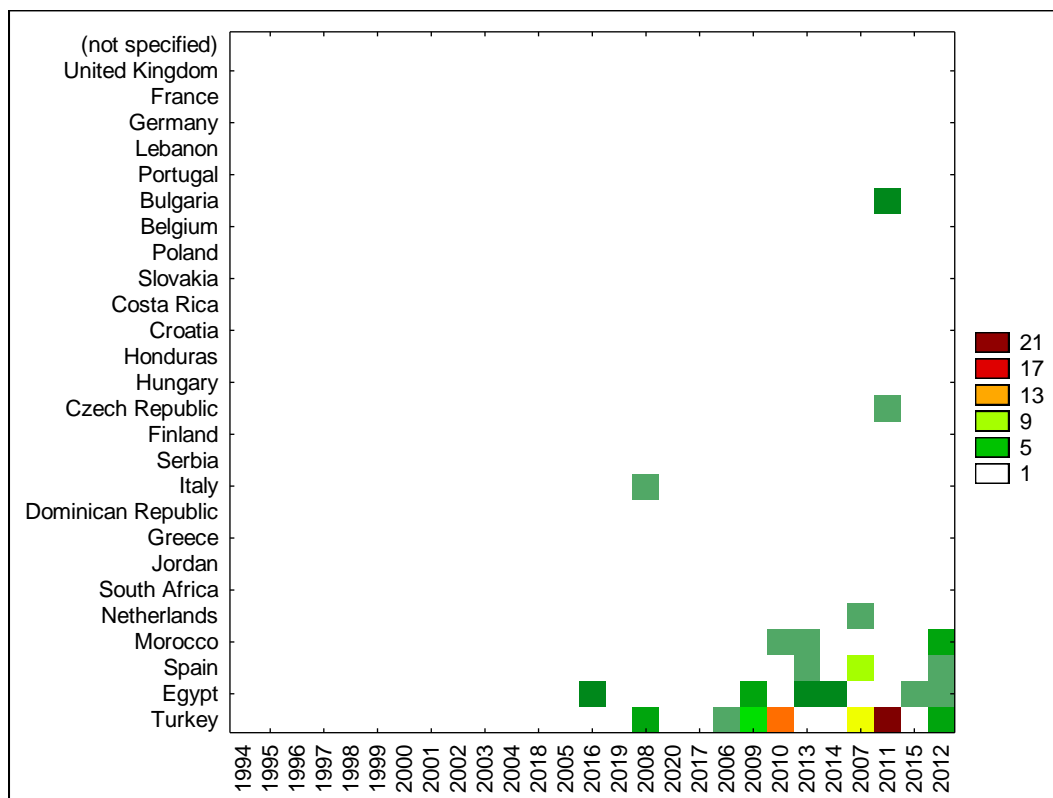

**Figure S16c.** Results of two-way joining cluster analysis for oxamyl (origin country)

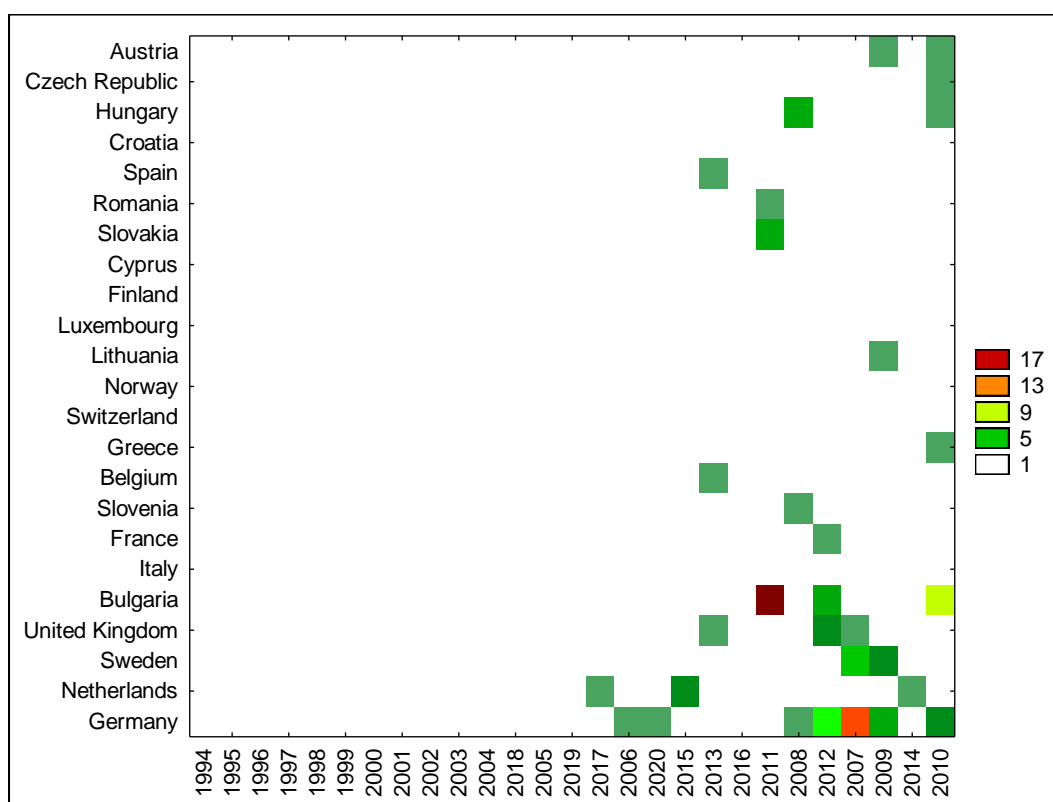

**Figure S16d.** Results of two-way joining cluster analysis for oxamyl (notifying country)

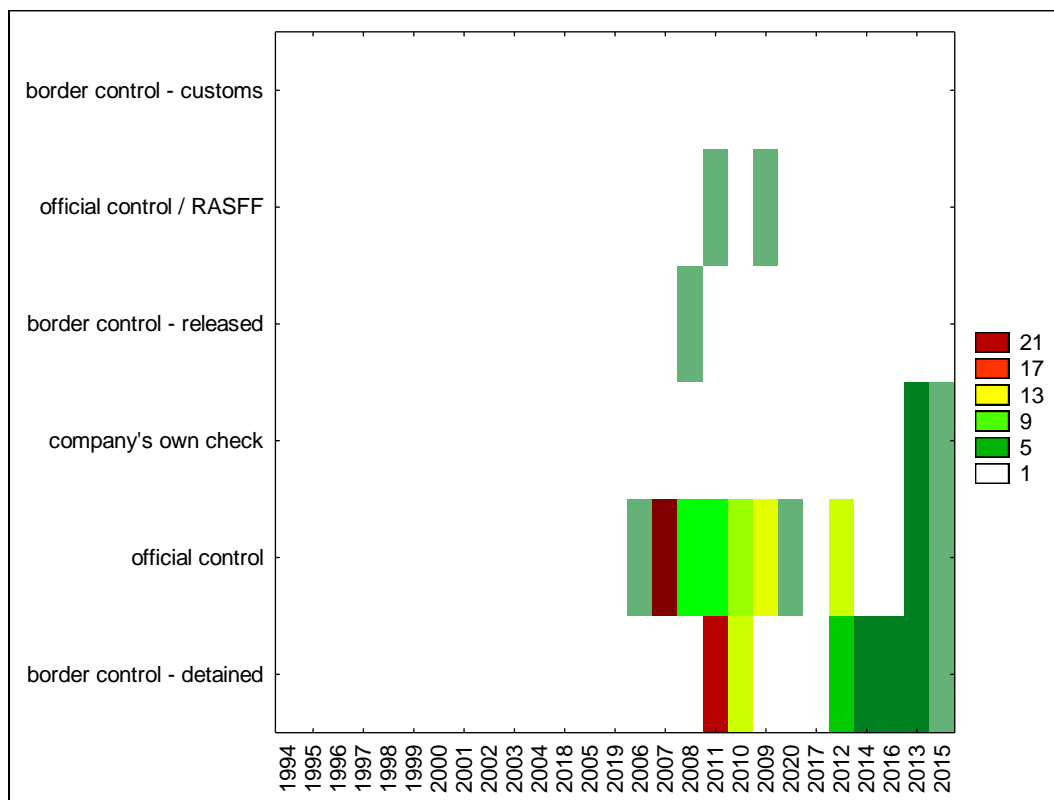

**Figure S16e.** Results of two-way joining cluster analysis for oxamyl (notification basis)

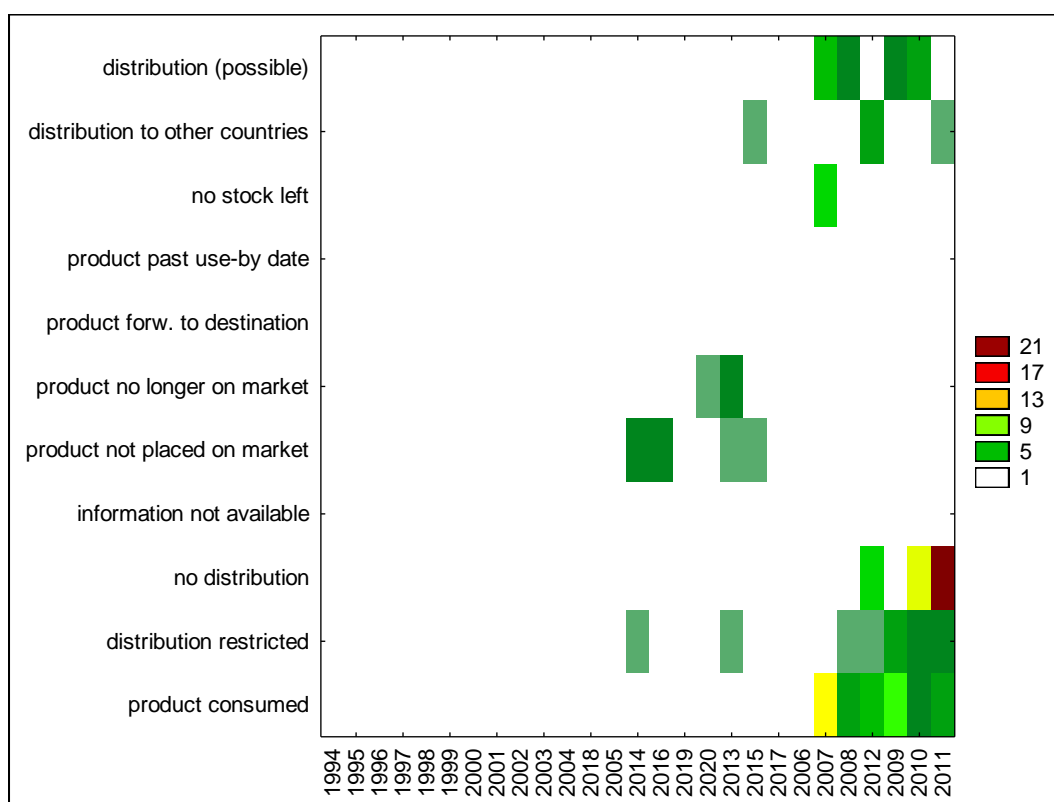

**Figure S16f.** Results of two-way joining cluster analysis for oxamyl (distribution status)

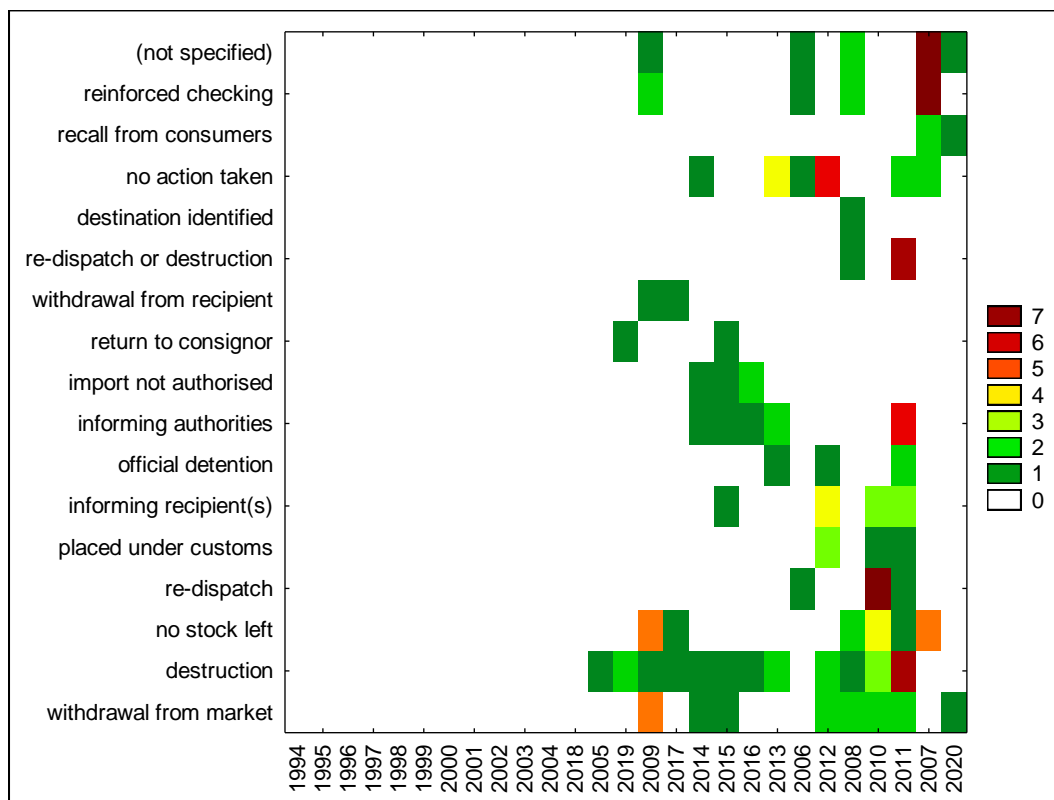

**Figure S16g.** Results of two-way joining cluster analysis for oxamyl (action taken)

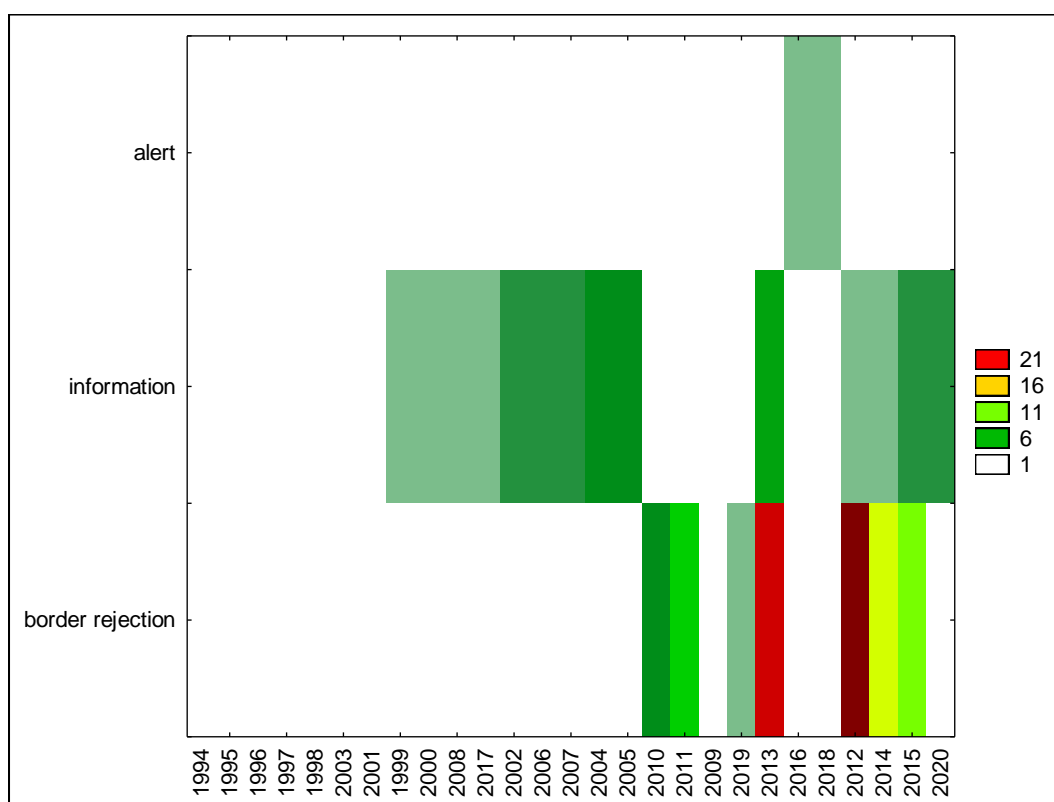

**Figure S17a.** Results of two-way joining cluster analysis for profenofos (notification type)

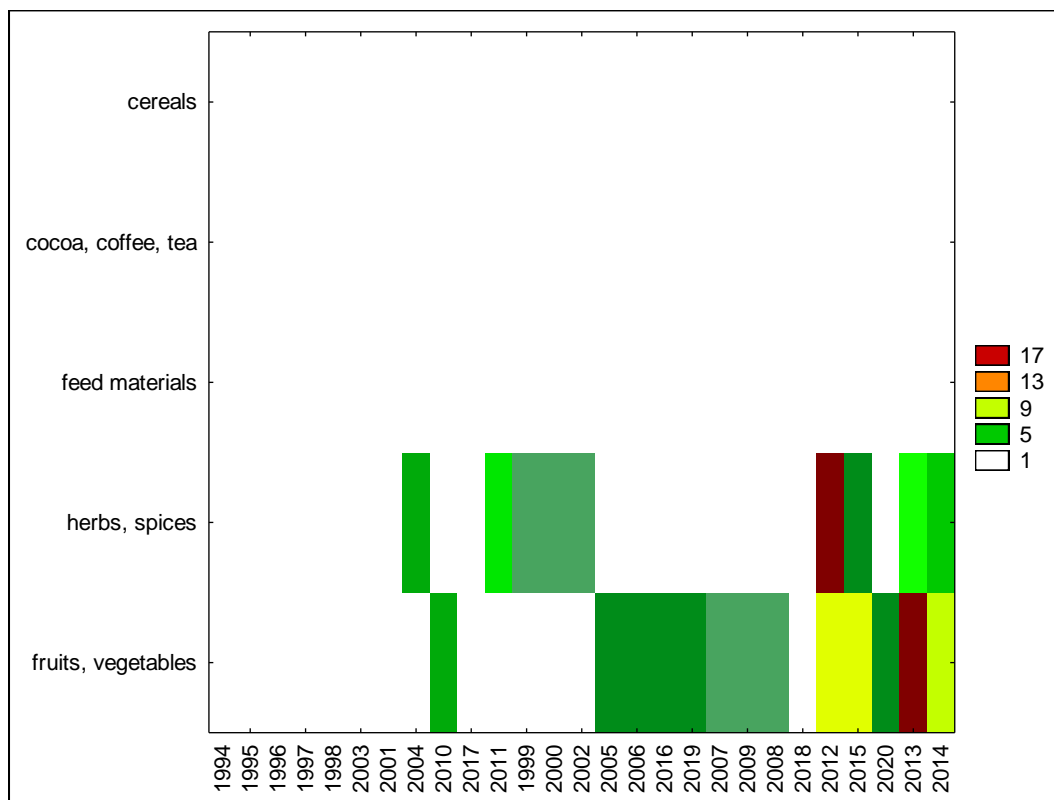

**Figure S17b.** Results of two-way joining cluster analysis for profenofos (product category)

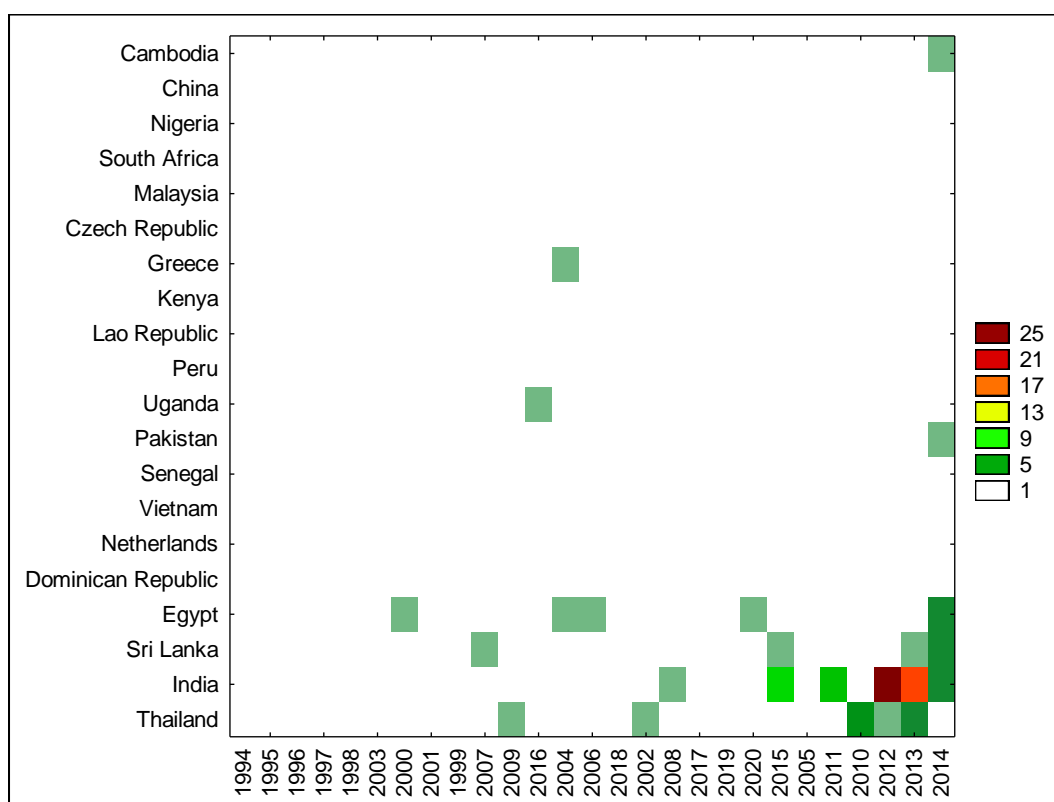

**Figure S17c.** Results of two-way joining cluster analysis for profenofos (origin country)

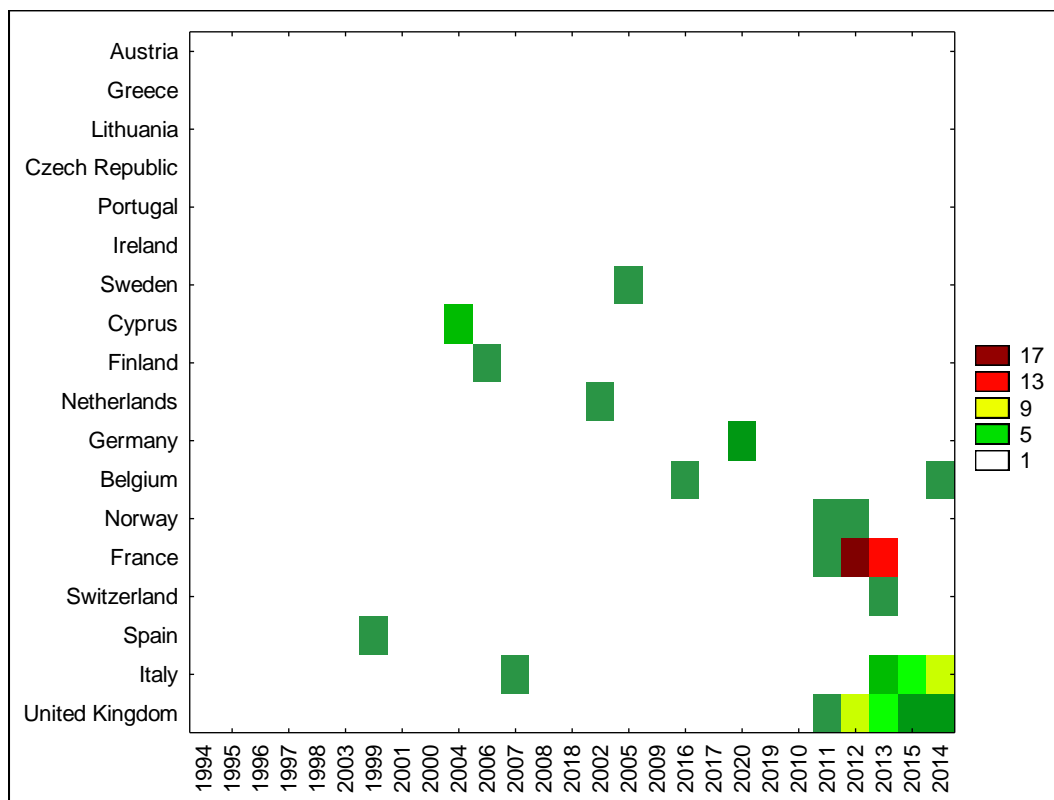

**Figure S17d.** Results of two-way joining cluster analysis for profenofos (notifying country)

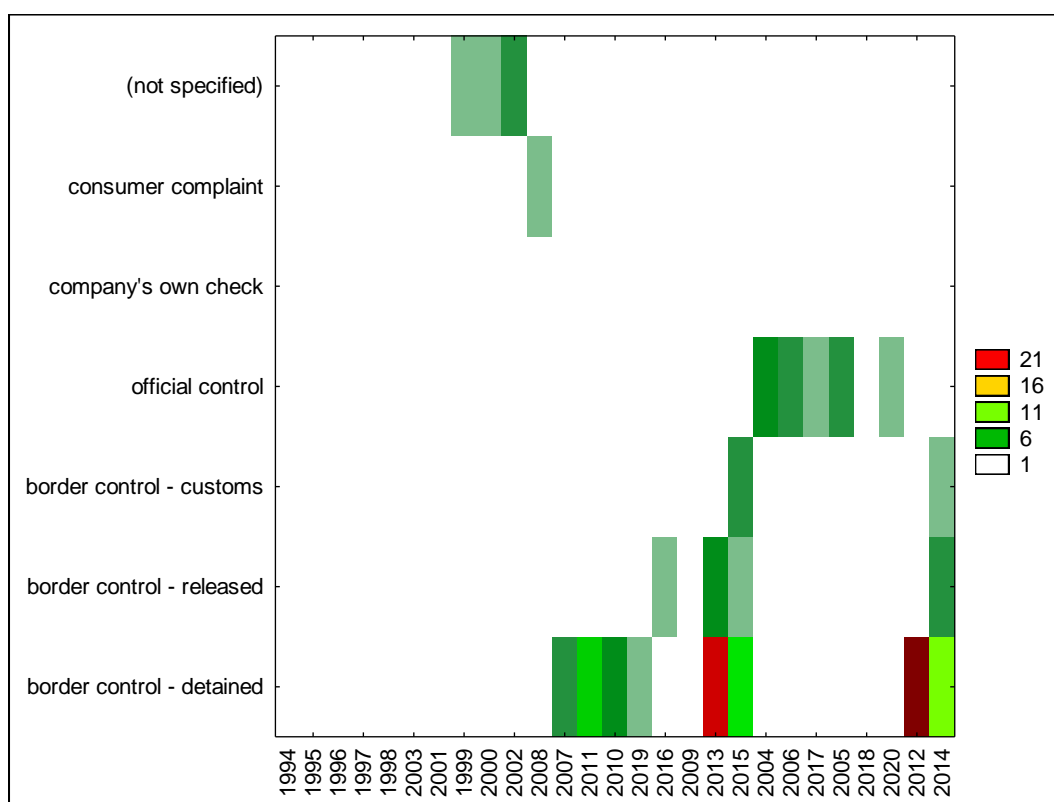

**Figure S17e.** Results of two-way joining cluster analysis for profenofos (notification basis)

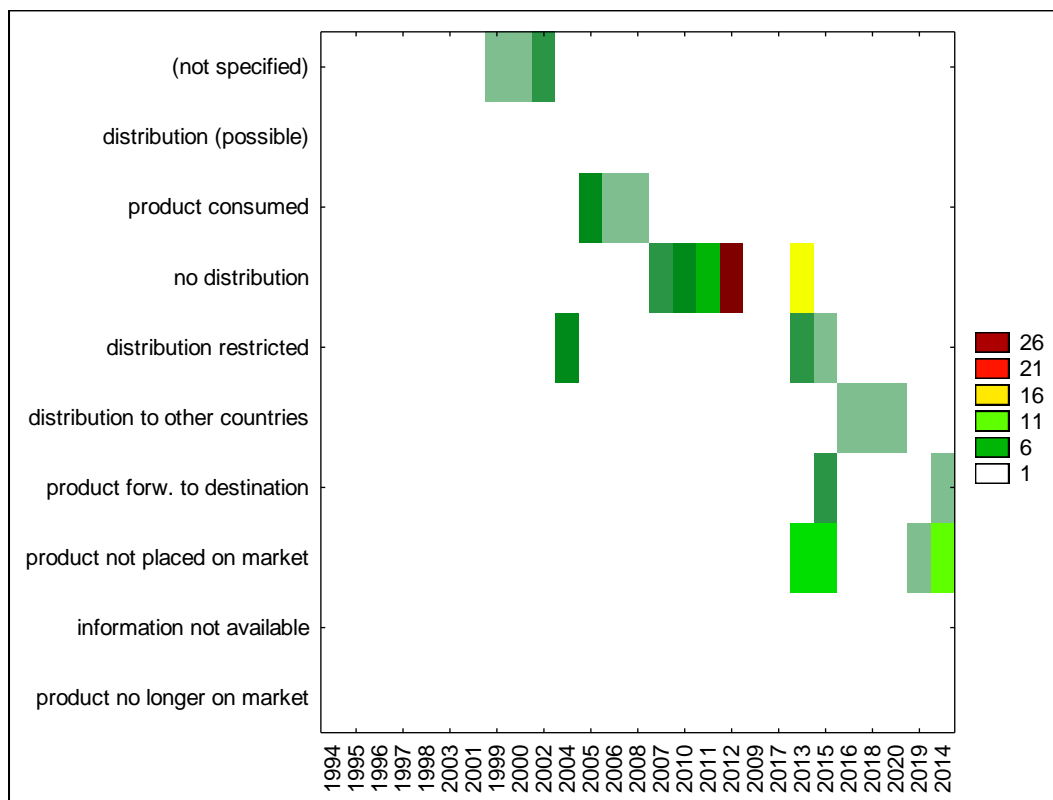

**Figure S17f.** Results of two-way joining cluster analysis for profenofos (distribution status)

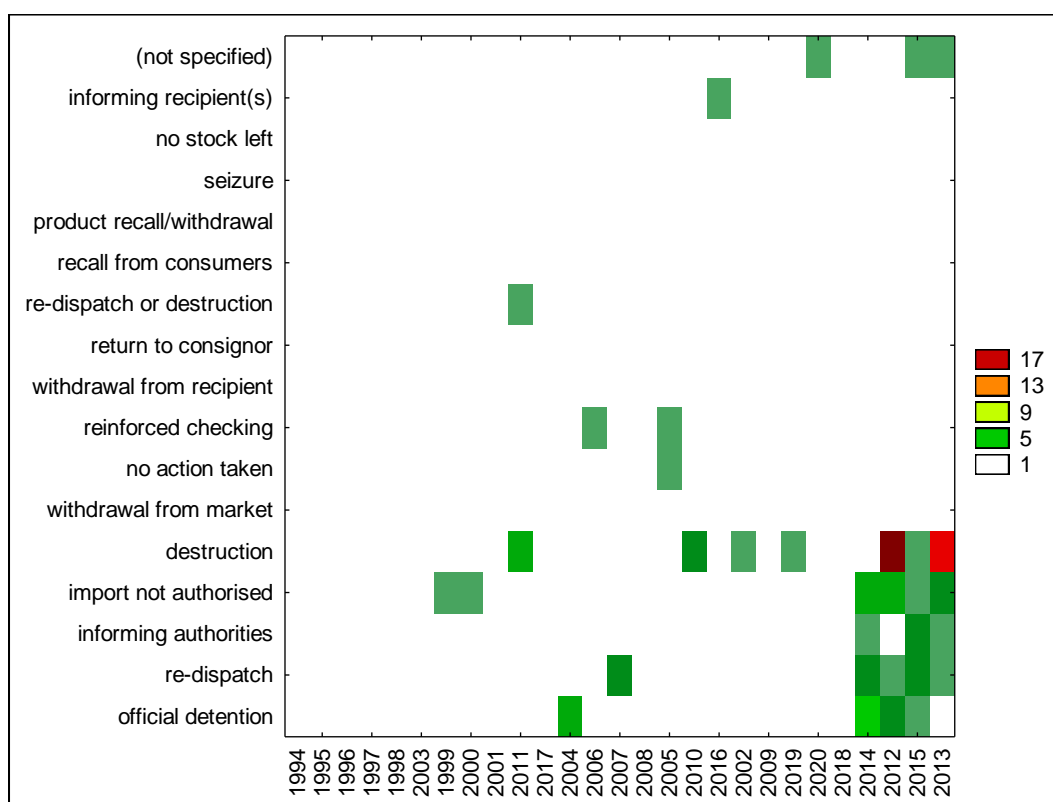

**Figure S17g.** Results of two-way joining cluster analysis for profenofos (action taken)



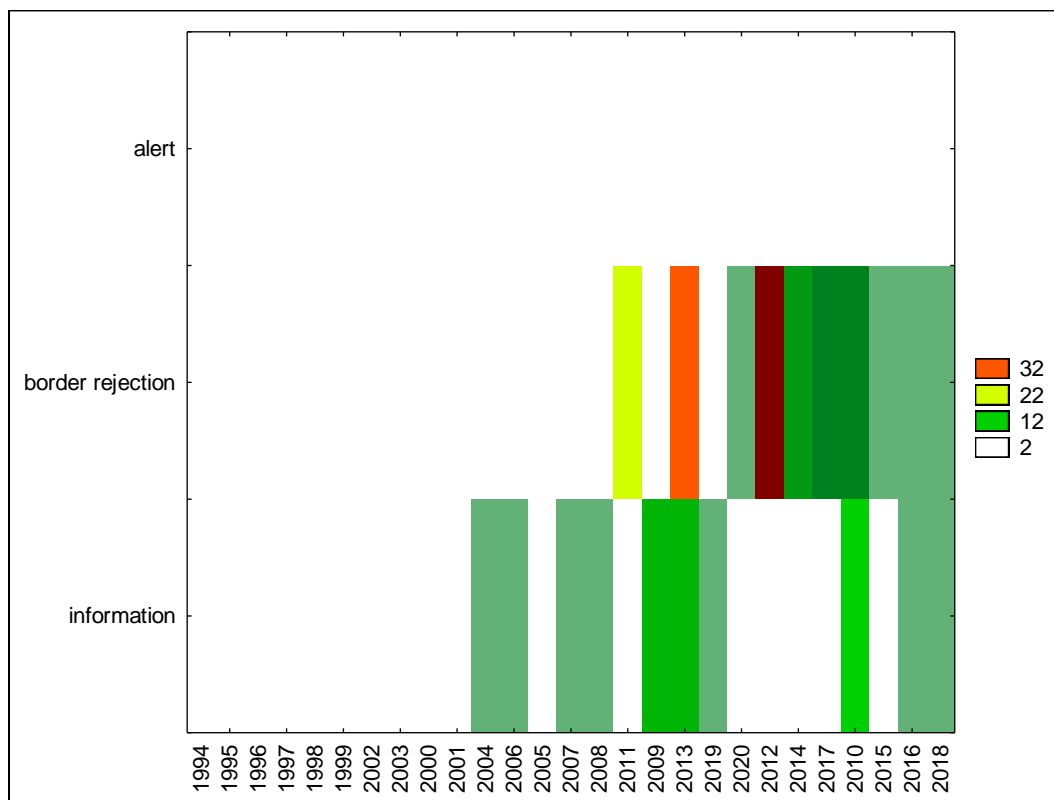

**Figure S18a.** Results of two-way joining cluster analysis for triazophos (notification type)

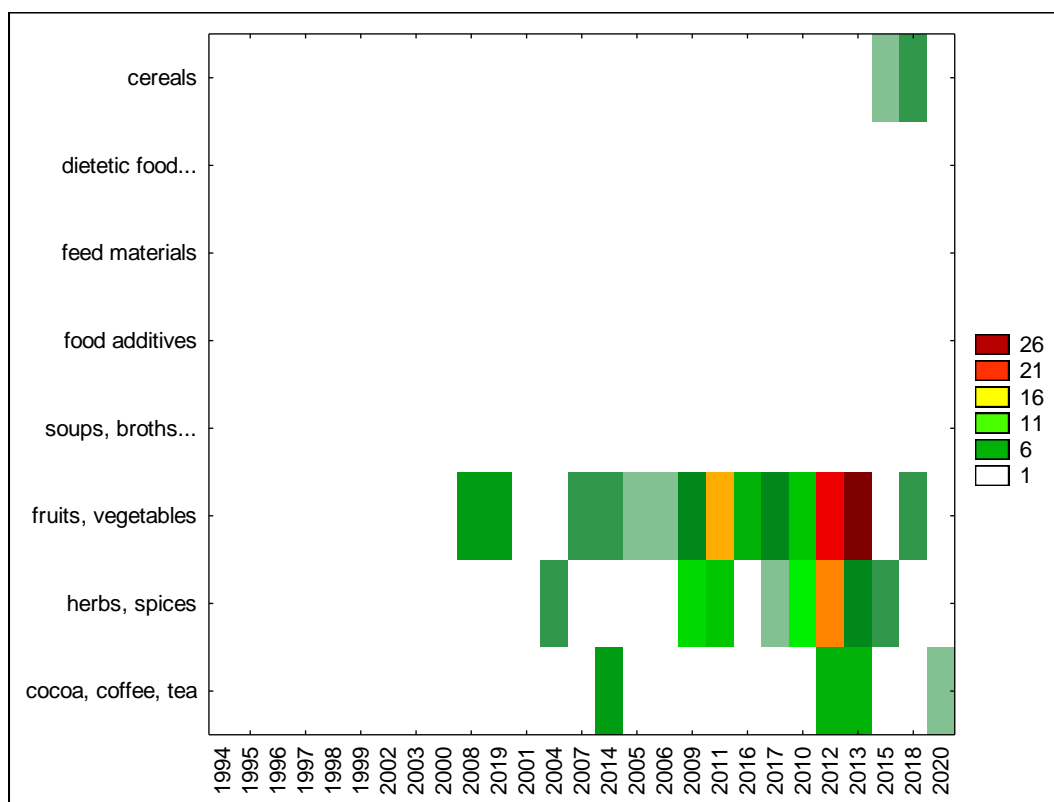

**Figure S18b.** Results of two-way joining cluster analysis for triazophos (product category)

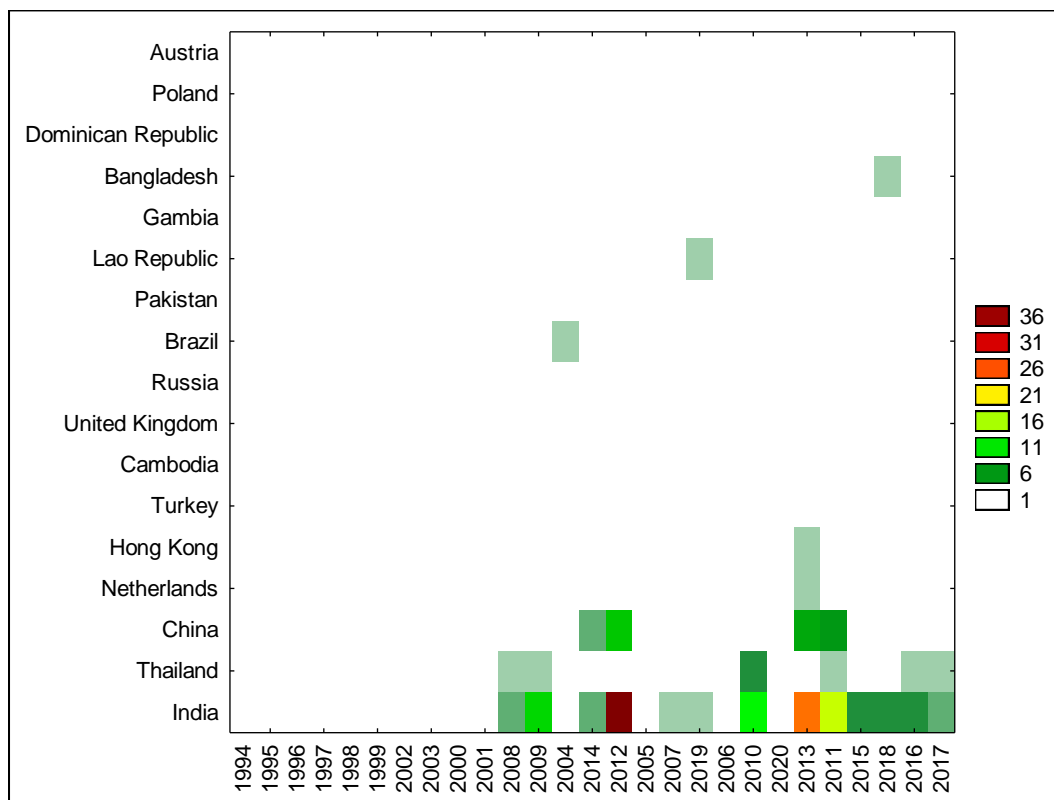

**Figure S18c.** Results of two-way joining cluster analysis for triazophos (origin country)

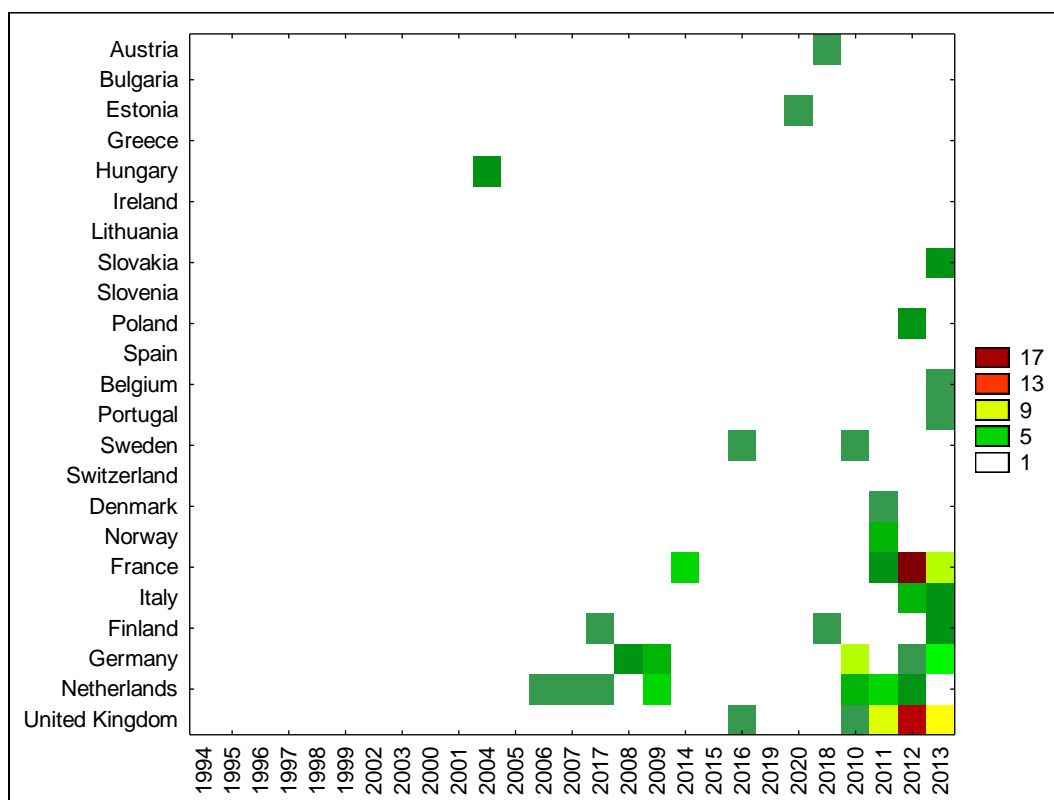

**Figure S18d.** Results of two-way joining cluster analysis for triazophos (notifying country)

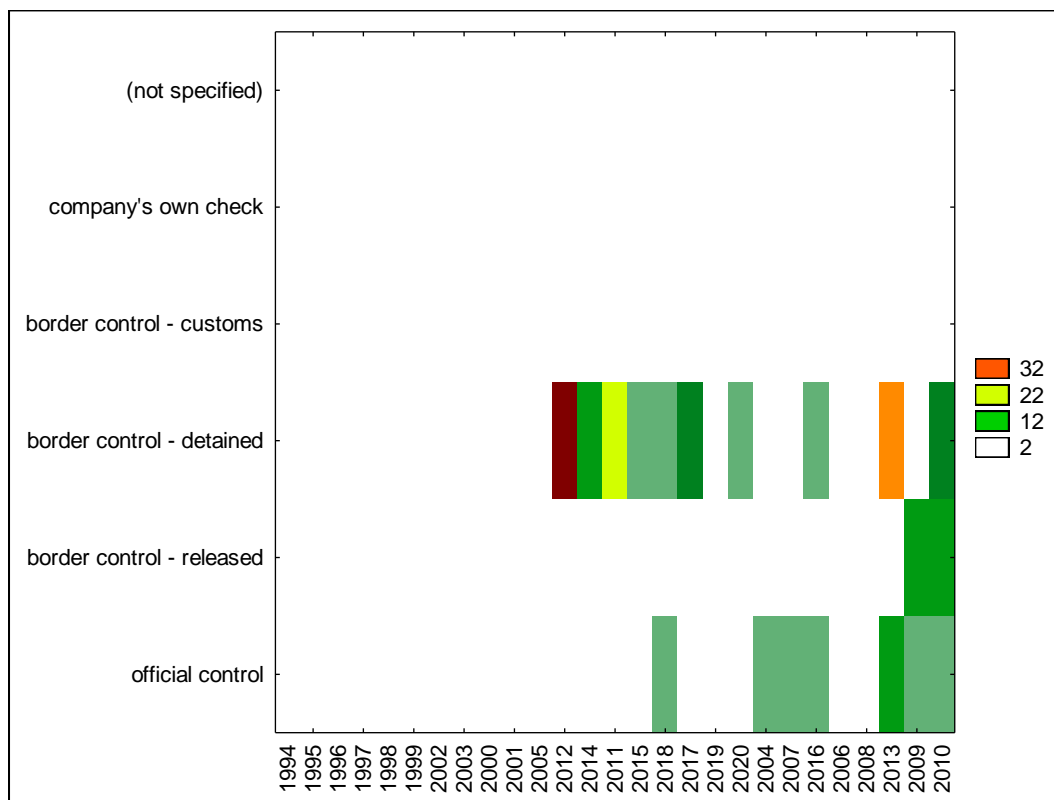

**Figure S18e.** Results of two-way joining cluster analysis for triazophos (notification basis)

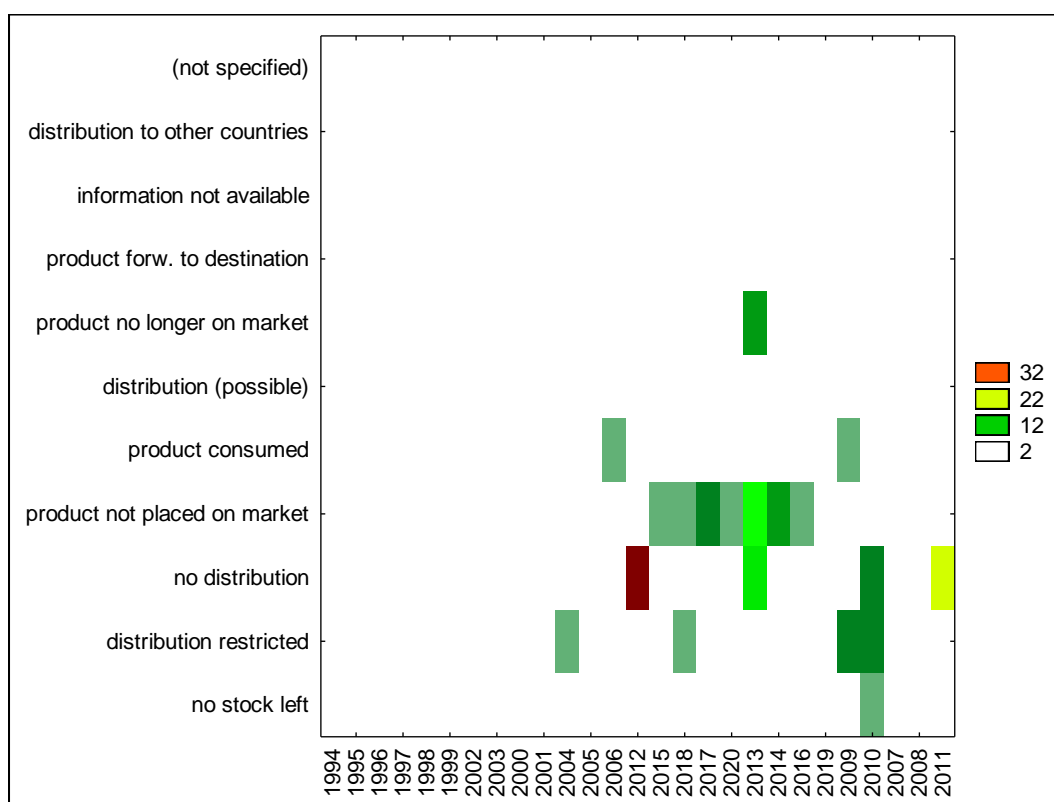

**Figure S18f.** Results of two-way joining cluster analysis for triazophos (distribution status)

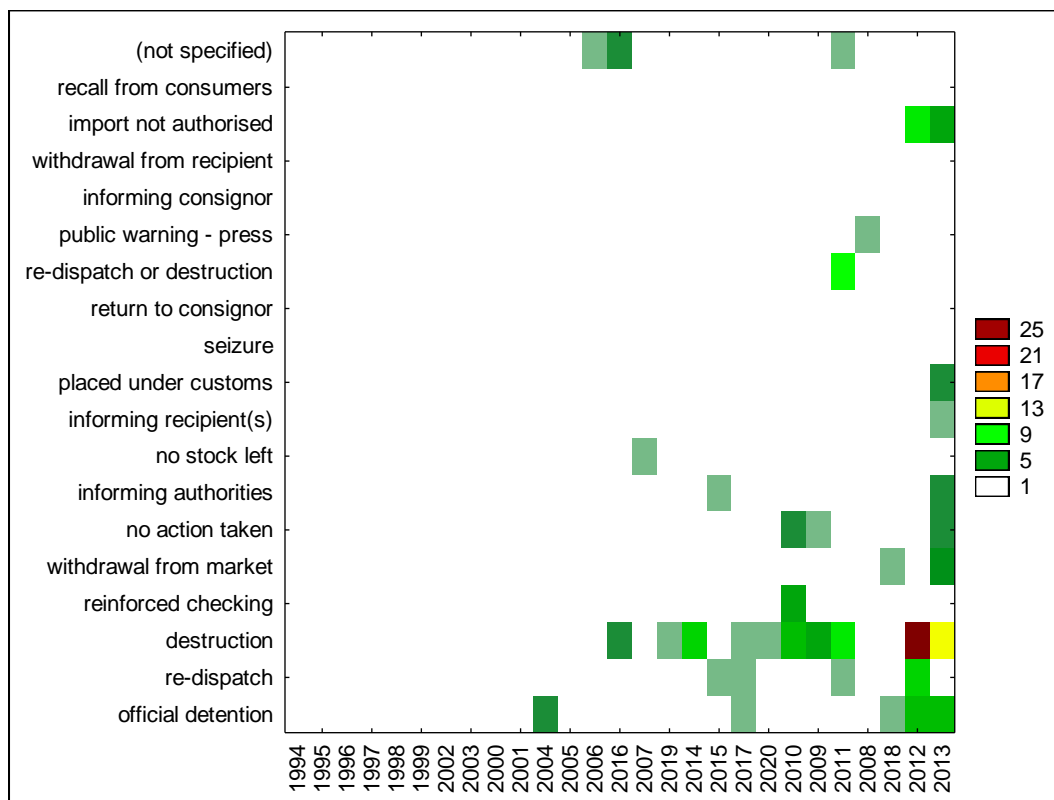

**Figure S18g.** Results of two-way joining cluster analysis for triazophos (action taken)
